# Supplementary material
Source: PubMed Central journal article supplement (PMC6088357)
Supplement: ml8b00289_si_001.pdf [file ml8b00289_si_001.pdf]

# Supporting Information

## Tariquidar-related chalcones and ketones as ABCG2 modulators

Diana Peña-Solórzano<sup>1,2</sup> Matthias Scholler,<sup>3</sup> Günther Bernhardt,<sup>3\*</sup> Armin Buschauer,<sup>3†</sup> Burkhard König,<sup>2\*</sup> Cristian Ochoa-Puentes<sup>1\*</sup>

<sup>1</sup>Laboratorio de Síntesis Orgánica Sostenible, Departamento de Química, Universidad Nacional de Colombia–Sede Bogotá, 5997 Bogotá, Colombia

<sup>2</sup>Institute of Organic Chemistry, University of Regensburg, D-93040 Regensburg, Germany

<sup>3</sup>Institute of Pharmacy, University of Regensburg, D-93040 Regensburg,

### Contents

|                                                                                   |    |
|-----------------------------------------------------------------------------------|----|
| 1. Experimental section .....                                                     | 2  |
| 1.1 Synthetic pathways.....                                                       | 2  |
| 1.2 Reagents and devices.....                                                     | 14 |
| 1.3 Synthesis and characterization.....                                           | 15 |
| 1.4 NMR spectra.....                                                              | 33 |
| 1.5 Purity (determined by HPLC) .....                                             | 52 |
| 2. Pharmacological evaluation .....                                               | 59 |
| 2.1 Chemicals and test compounds .....                                            | 59 |
| 2.2 Cells and culture conditions .....                                            | 59 |
| 2.3 Calcein-AM microplate assay for the determination of ABCB1 modulation.....    | 60 |
| 2.4 Calcein-AM microplate assay for the determination of ABCC1 modulation .....   | 60 |
| 2.5 Hoechst 33342 microplate assay for the determination of ABCG2 modulation..... | 61 |
| 2.6 Stability of test compounds Dulbecco's Modified Eagle Medium (DMEM) .....     | 62 |
| References.....                                                                   | 64 |

# 1. Experimental section

## 1.1 Synthetic pathways

(E)-N-(3-(3-(4-(2-(6,7-dimethoxy-3,4-dihydroisoquinolin-2(1H)-yl)ethoxy)phenyl)acryloyl)phenyl)quinoline-2-carboxamide

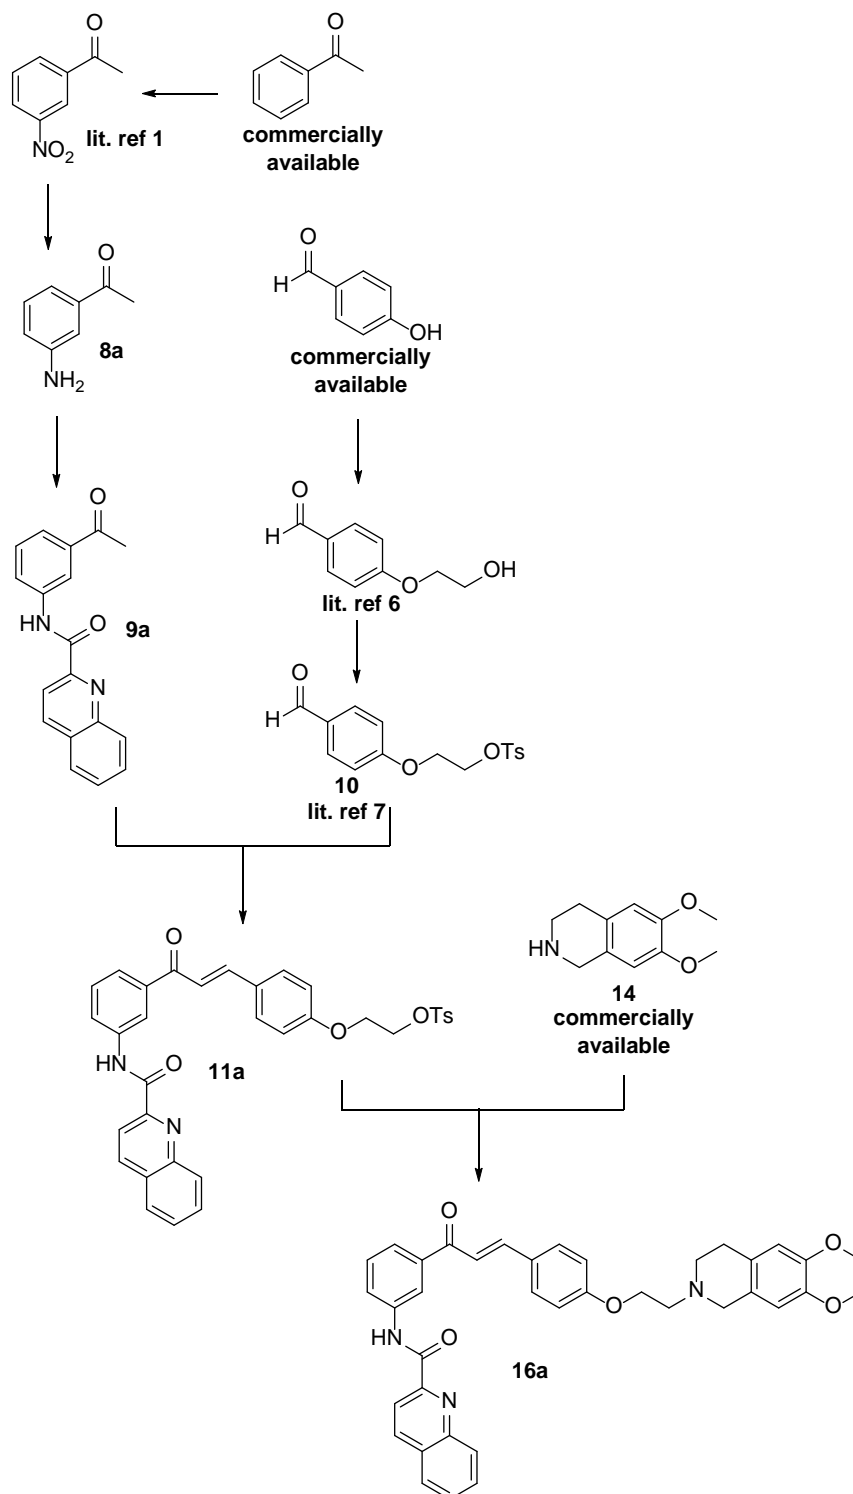

**(E)-N-(3-(3-(4-(2-(6-methoxy-7-(2-methoxyethoxy)-3,4-dihydroisoquinolin-2(1H)-yl)ethoxy)phenyl)acryloyl)phenyl)quinoline-2-carboxamide**

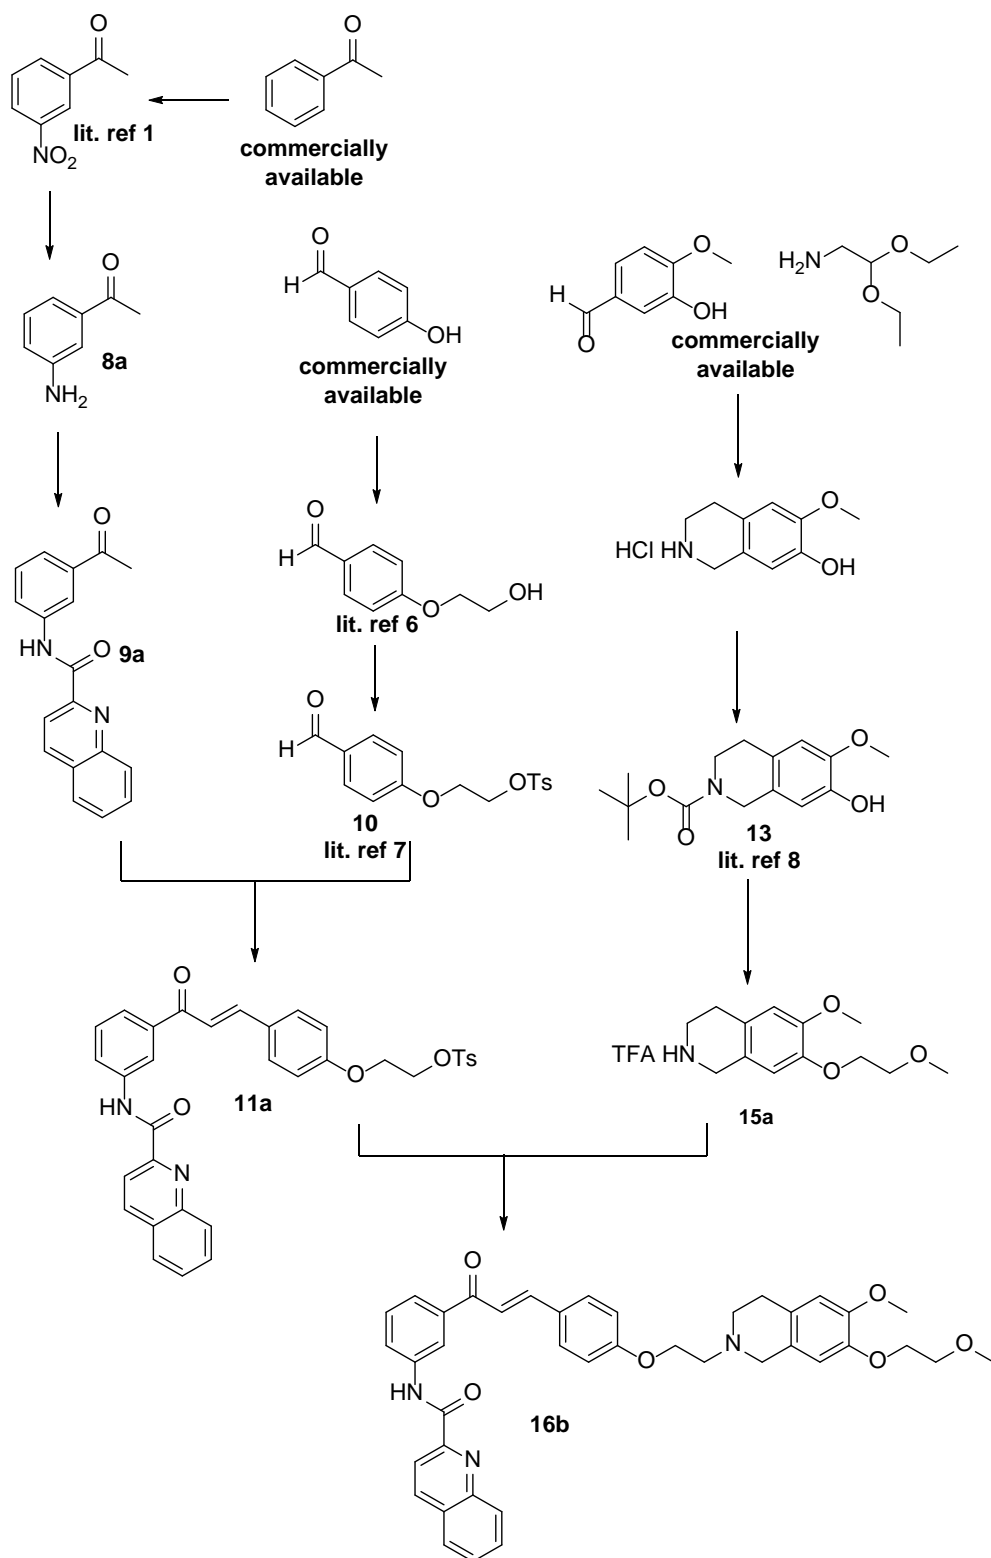

**(E)-N-(3-(3-(4-(2-(6,7-bis(2-(2-(2-methoxyethoxy)ethoxy)ethoxy)ethoxy)-3,4-dihydroisoquinolin-2(1H)-yl)ethoxy)phenyl)acryloyl)phenyl)quinoline-2-carboxamide**

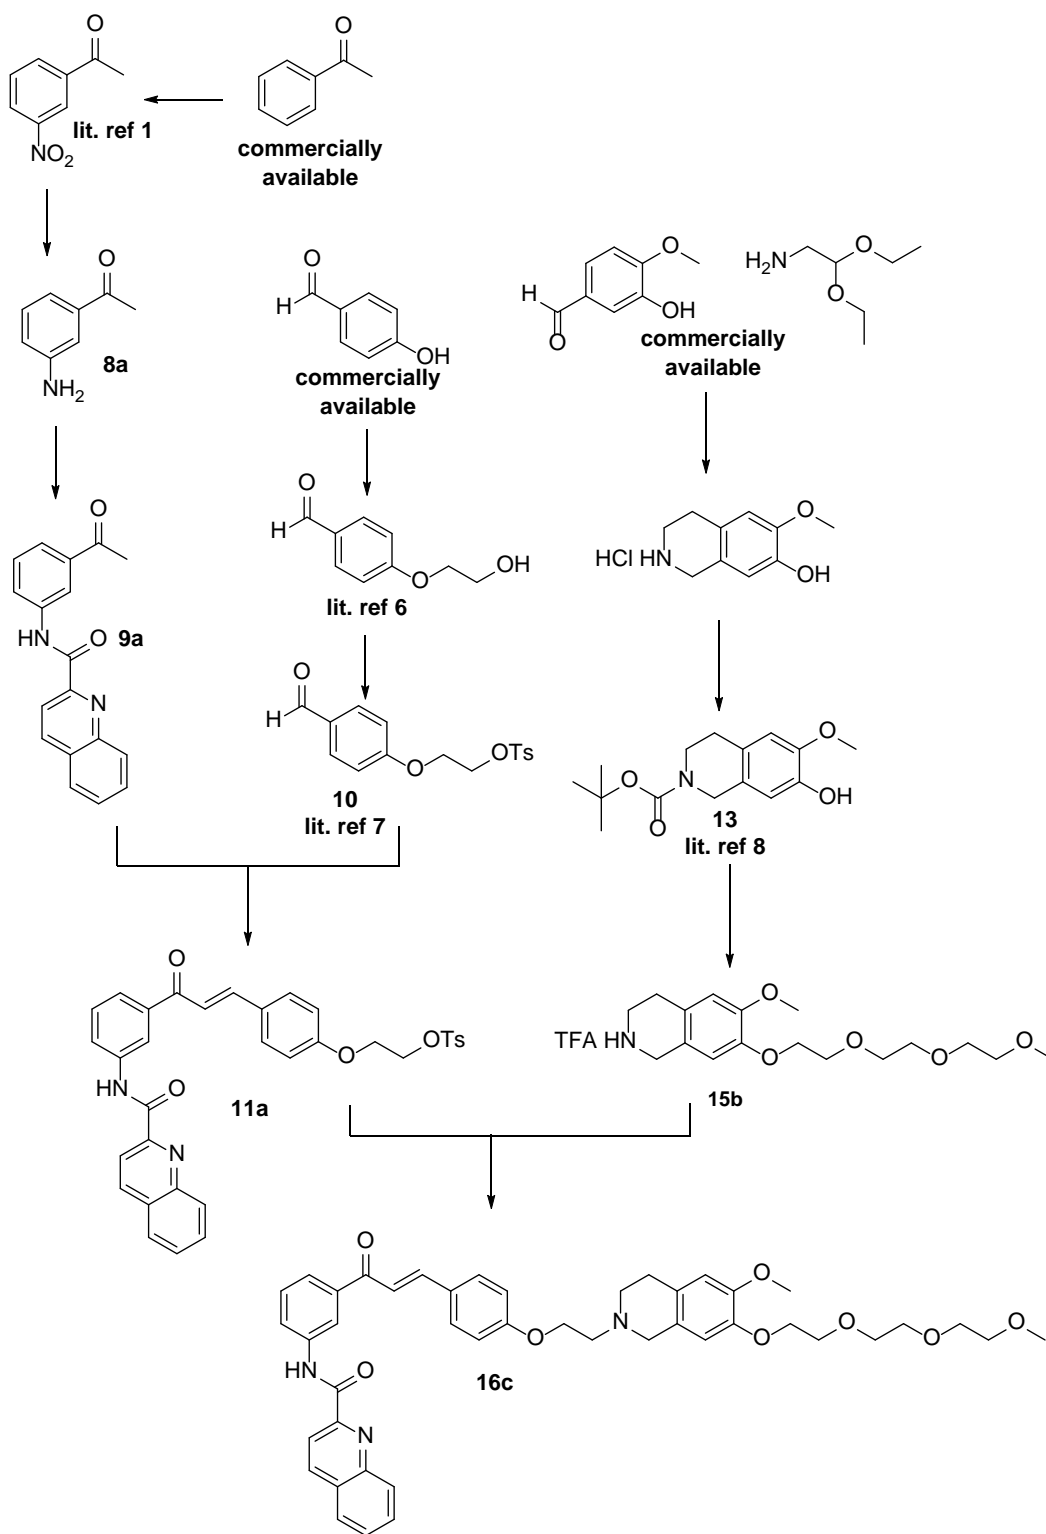

**(E)-N-(5-(3-(4-(2-(6,7-dimethoxy-3,4-dihydroisoquinolin-2(1H)-yl)ethoxy)phenyl)acryloyl)-2-methylphenyl)quinoline-2-carboxamide**

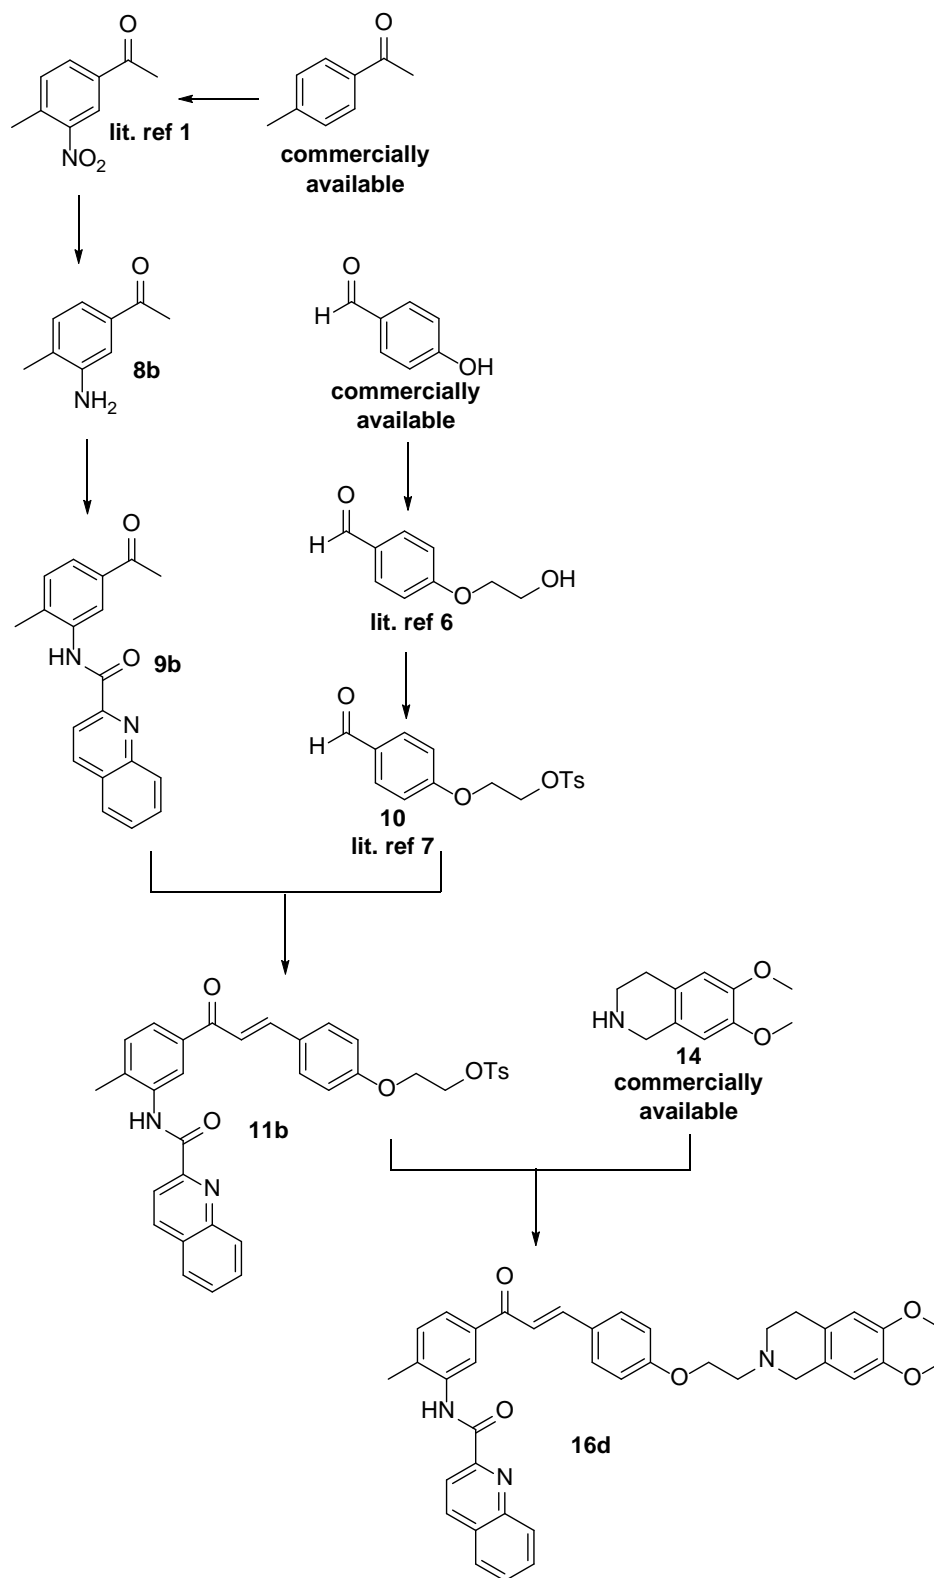



**(E)-N-(5-(3-(4-(2-(6,7-bis(2-(2-(2-methoxyethoxy)ethoxy)ethoxy)ethoxy)-3,4-dihydroisoquinolin-2(1H)-yl)ethoxy)phenyl)acryloyl)-2-methylphenyl)quinoline-2-carboxamide**

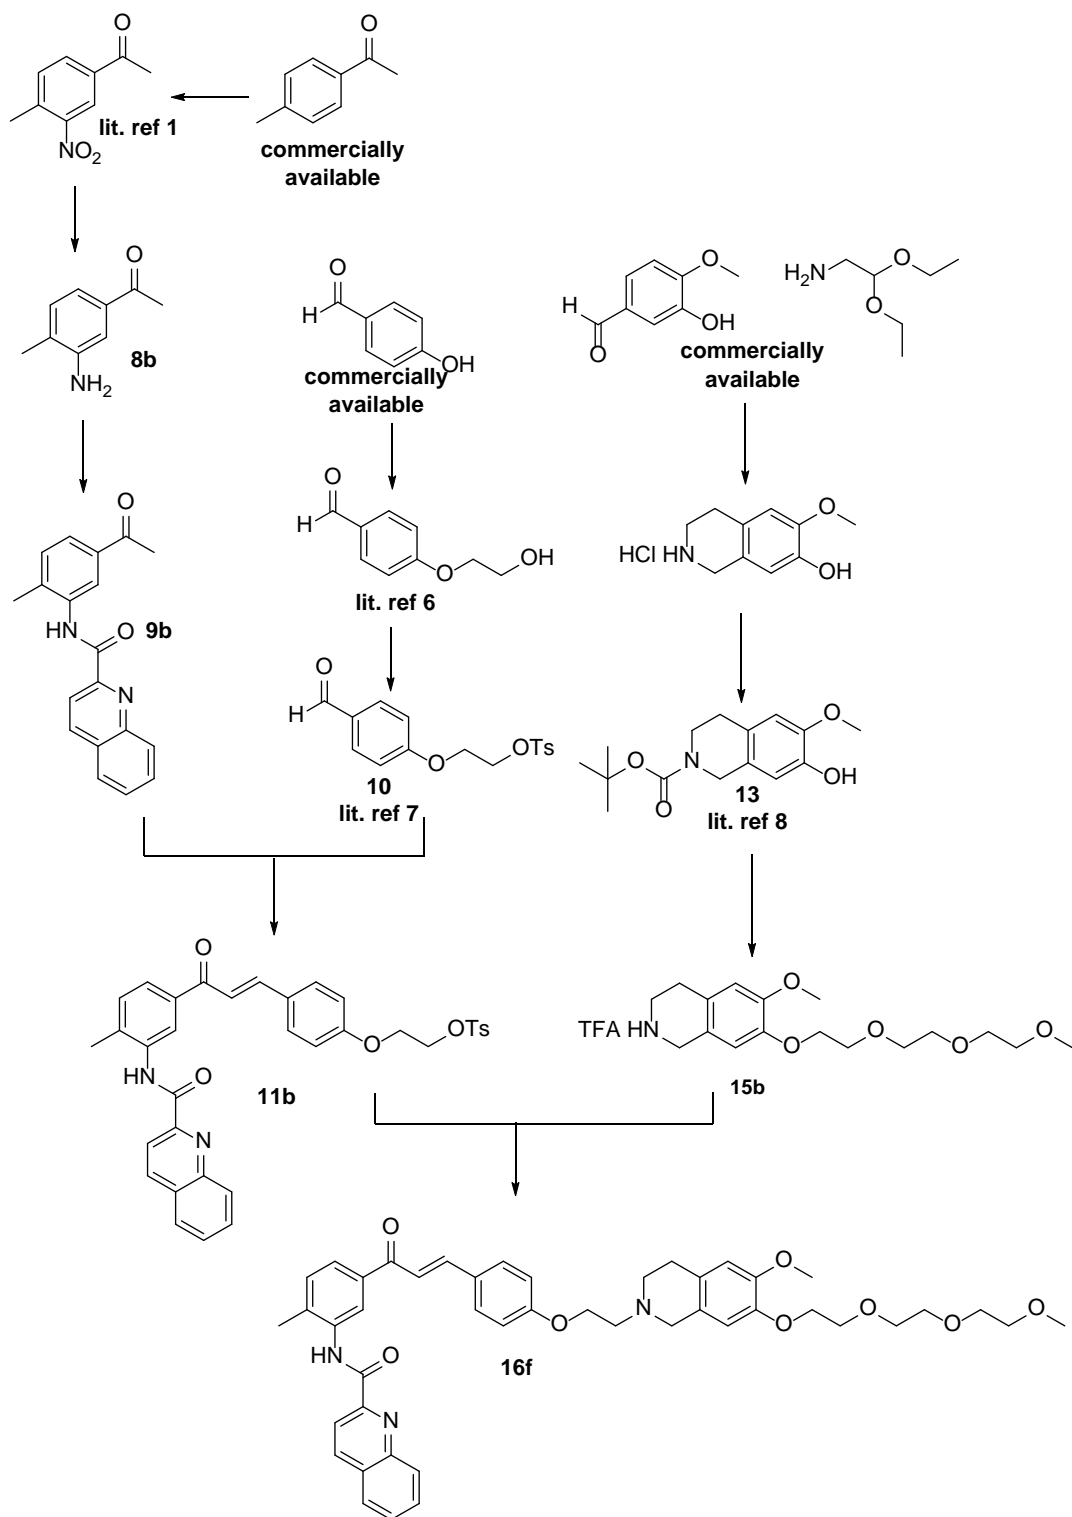

**N-(3-(2-(6,7-dimethoxy-3,4-dihydroisoquinolin-2(1H)-yl)acetyl)phenyl)quinoline-2-carboxamide**

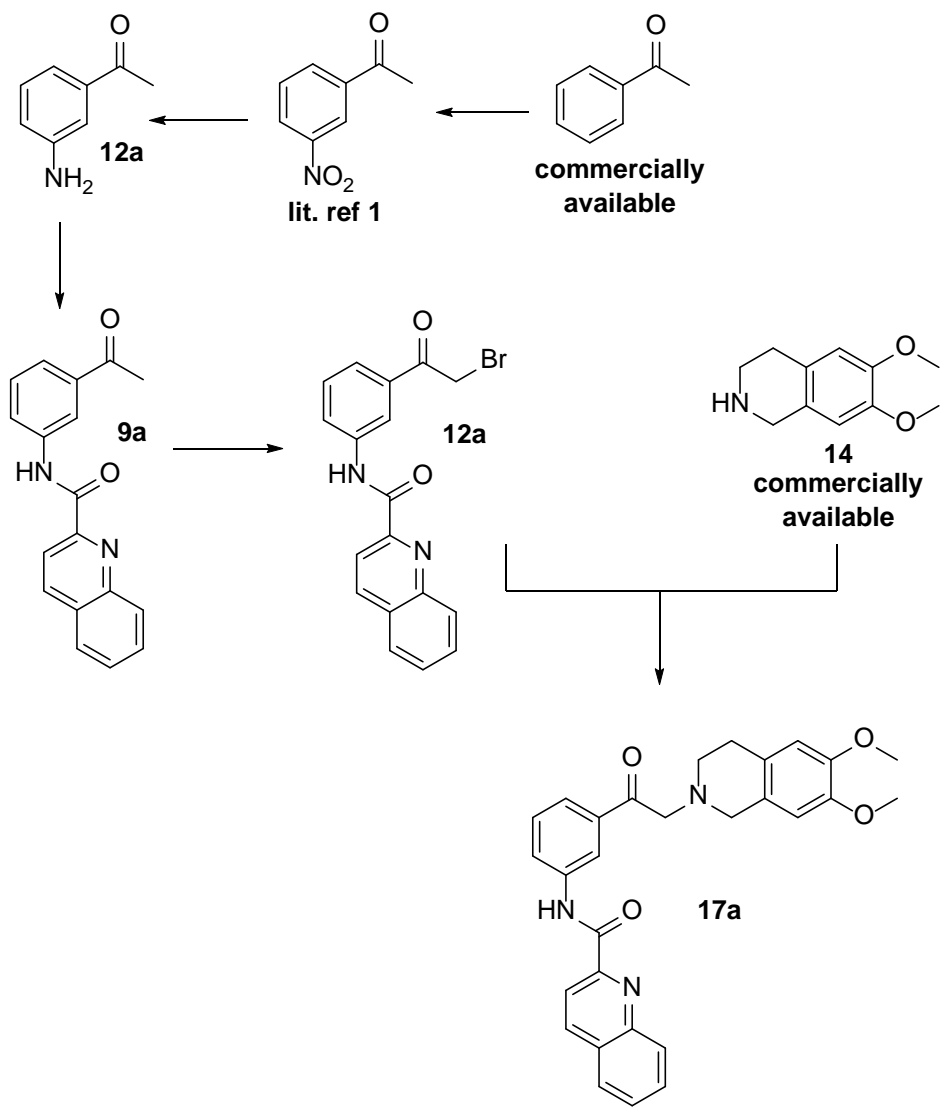



**N-(3-(2-(6-methoxy-7-(2-methoxyethoxy)-3,4-dihydroisoquinolin-2(1H)-yl)acetyl)phenyl)quinoline-2-carboxamide**

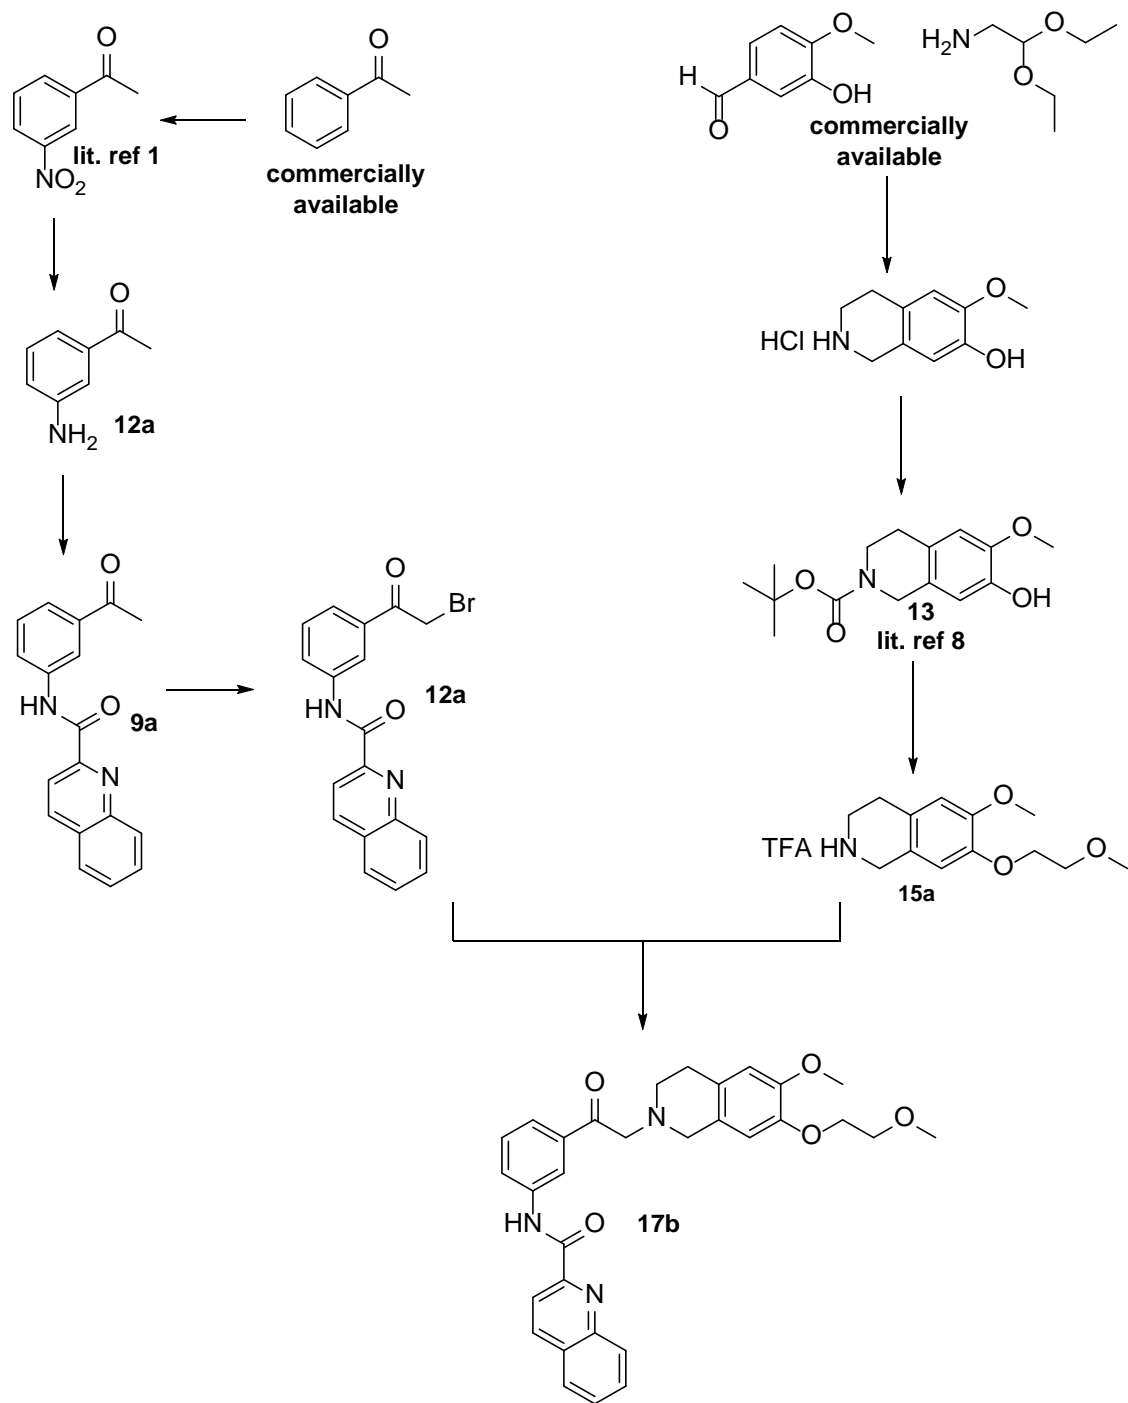

**N-(3-(2-(6,7-bis(2-(2-(2-methoxyethoxy)ethoxy)ethoxy)ethoxy)ethoxy)-3,4-dihydroisoquinolin-2(1H)-yl)acetyl)phenyl)quinoline-2-carboxamide**

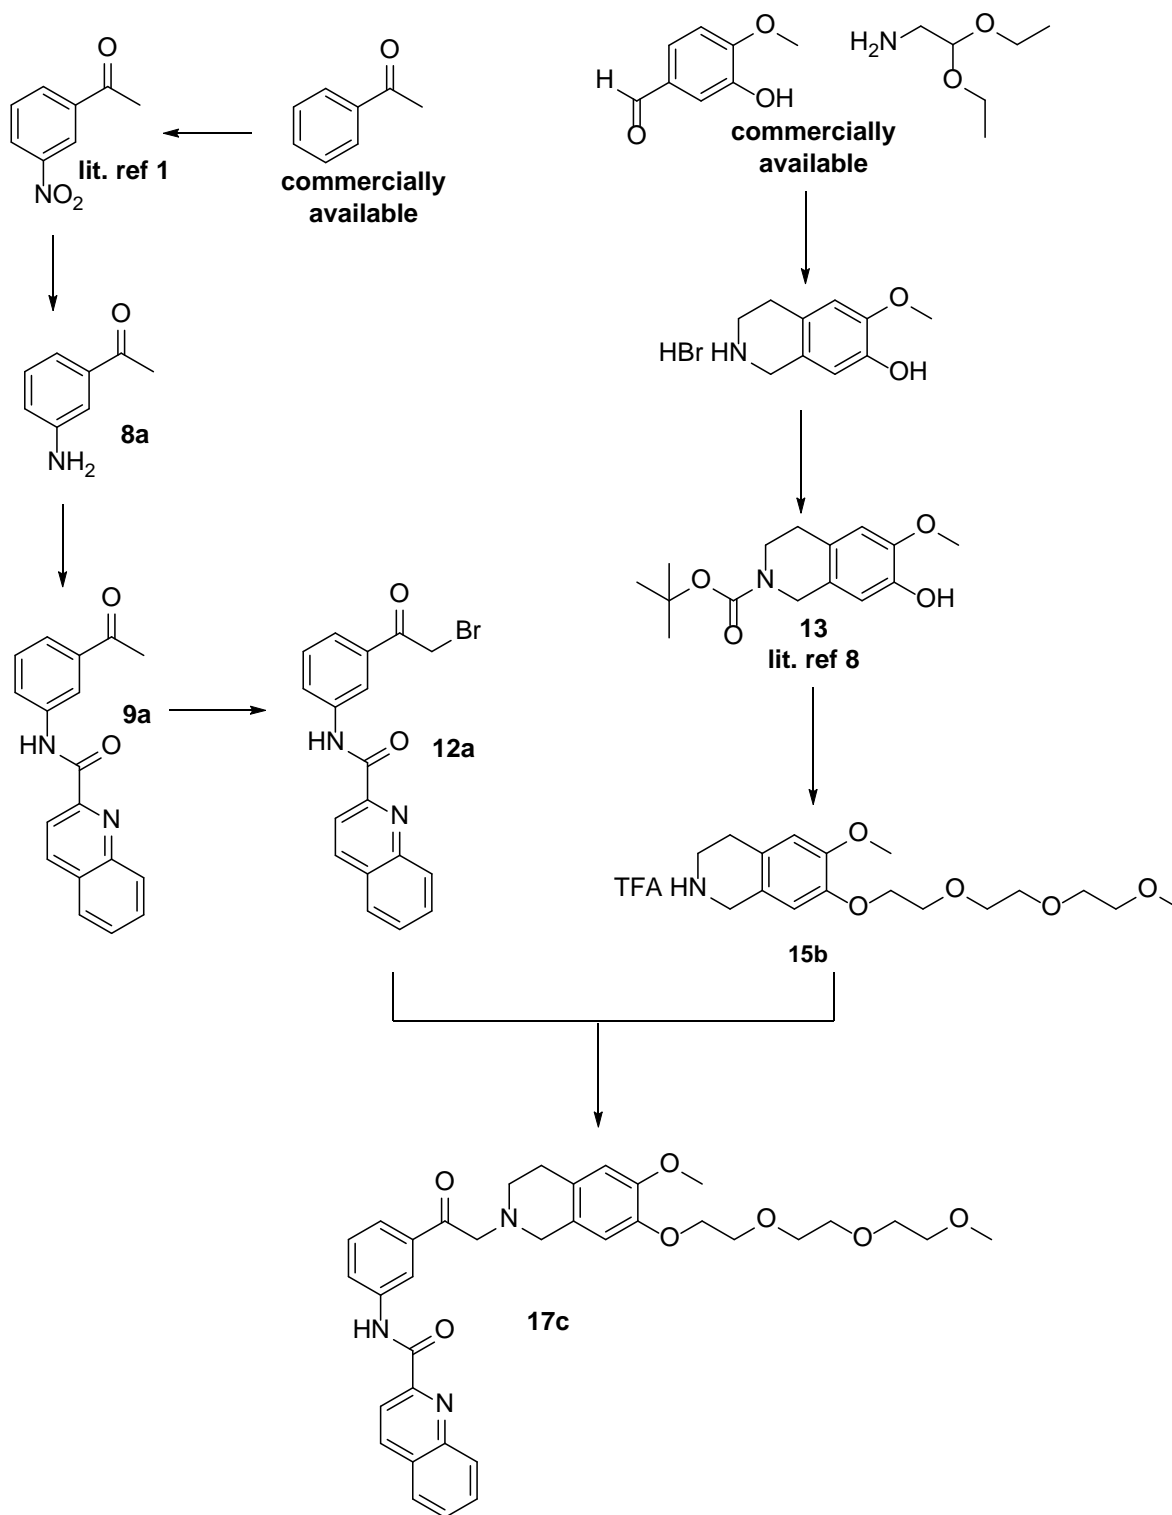

**N-(5-(2-(6,7-dimethoxy-3,4-dihydroisoquinolin-2(1H)-yl)acetyl)-2-methylphenyl)quinoline-2-carboxamide**

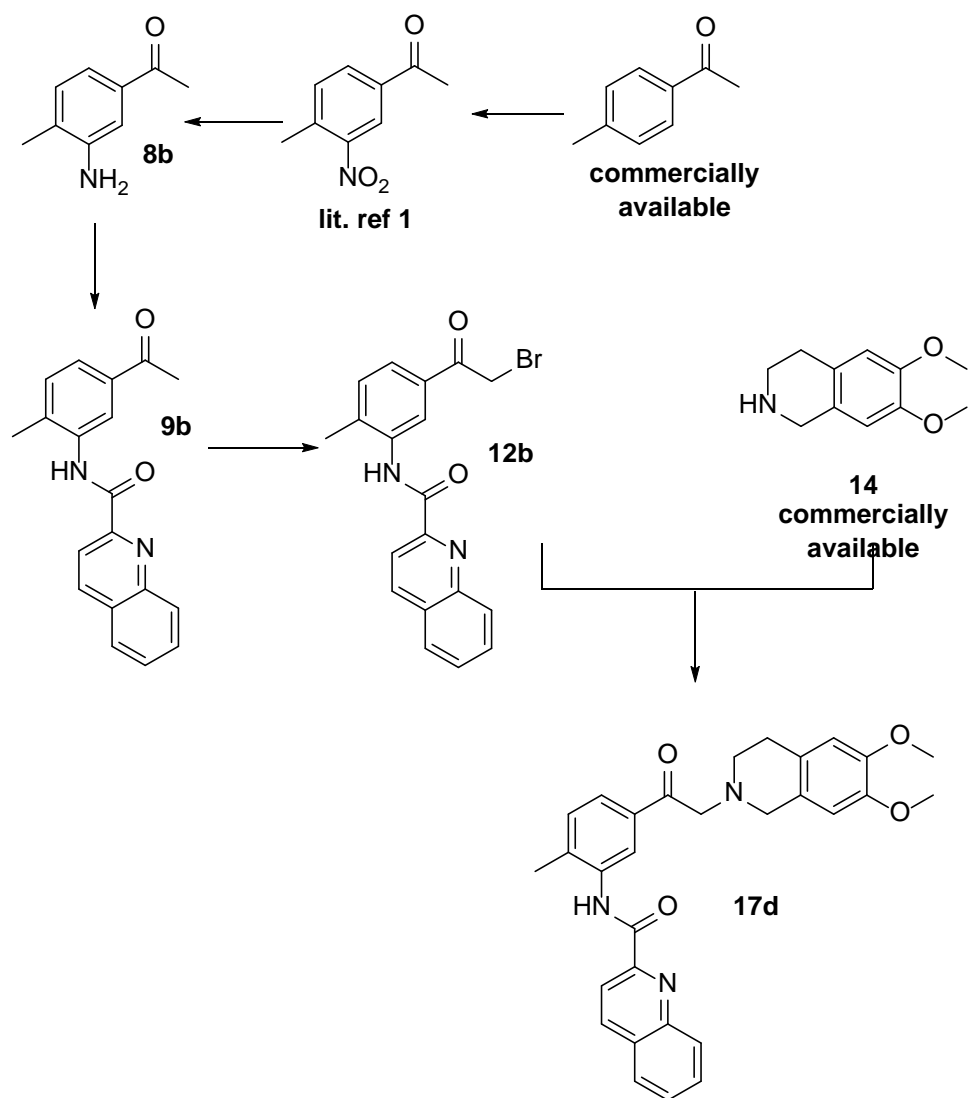

**N-(3-(2-(6-methoxy-7-(2-methoxyethoxy)-3,4-dihydroisoquinolin-2(1H)-yl)acetyl)phenyl)quinoline-2-carboxamide**

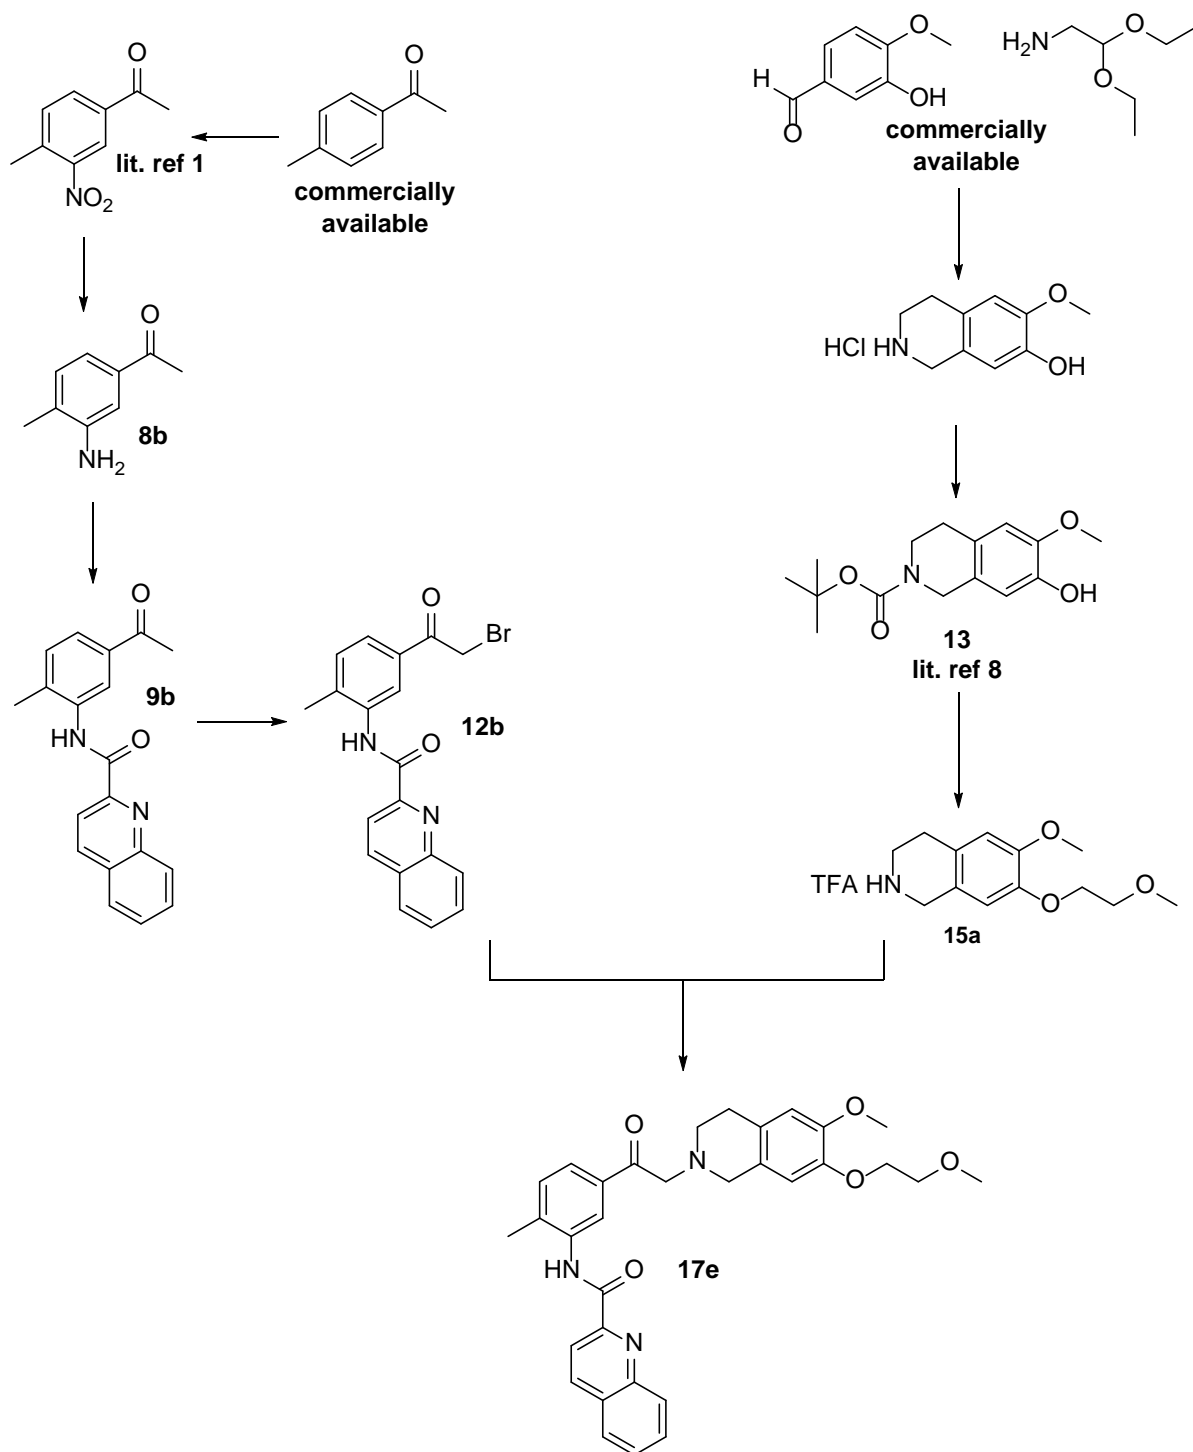

**N-(5-(2-(6,7-bis(2-(2-(2-methoxyethoxy)ethoxy)ethoxy)ethoxy)-3,4-dihydroisoquinolin-2(1H)-yl)acetyl)-2-methylphenyl)quinoline-2-carboxamide**

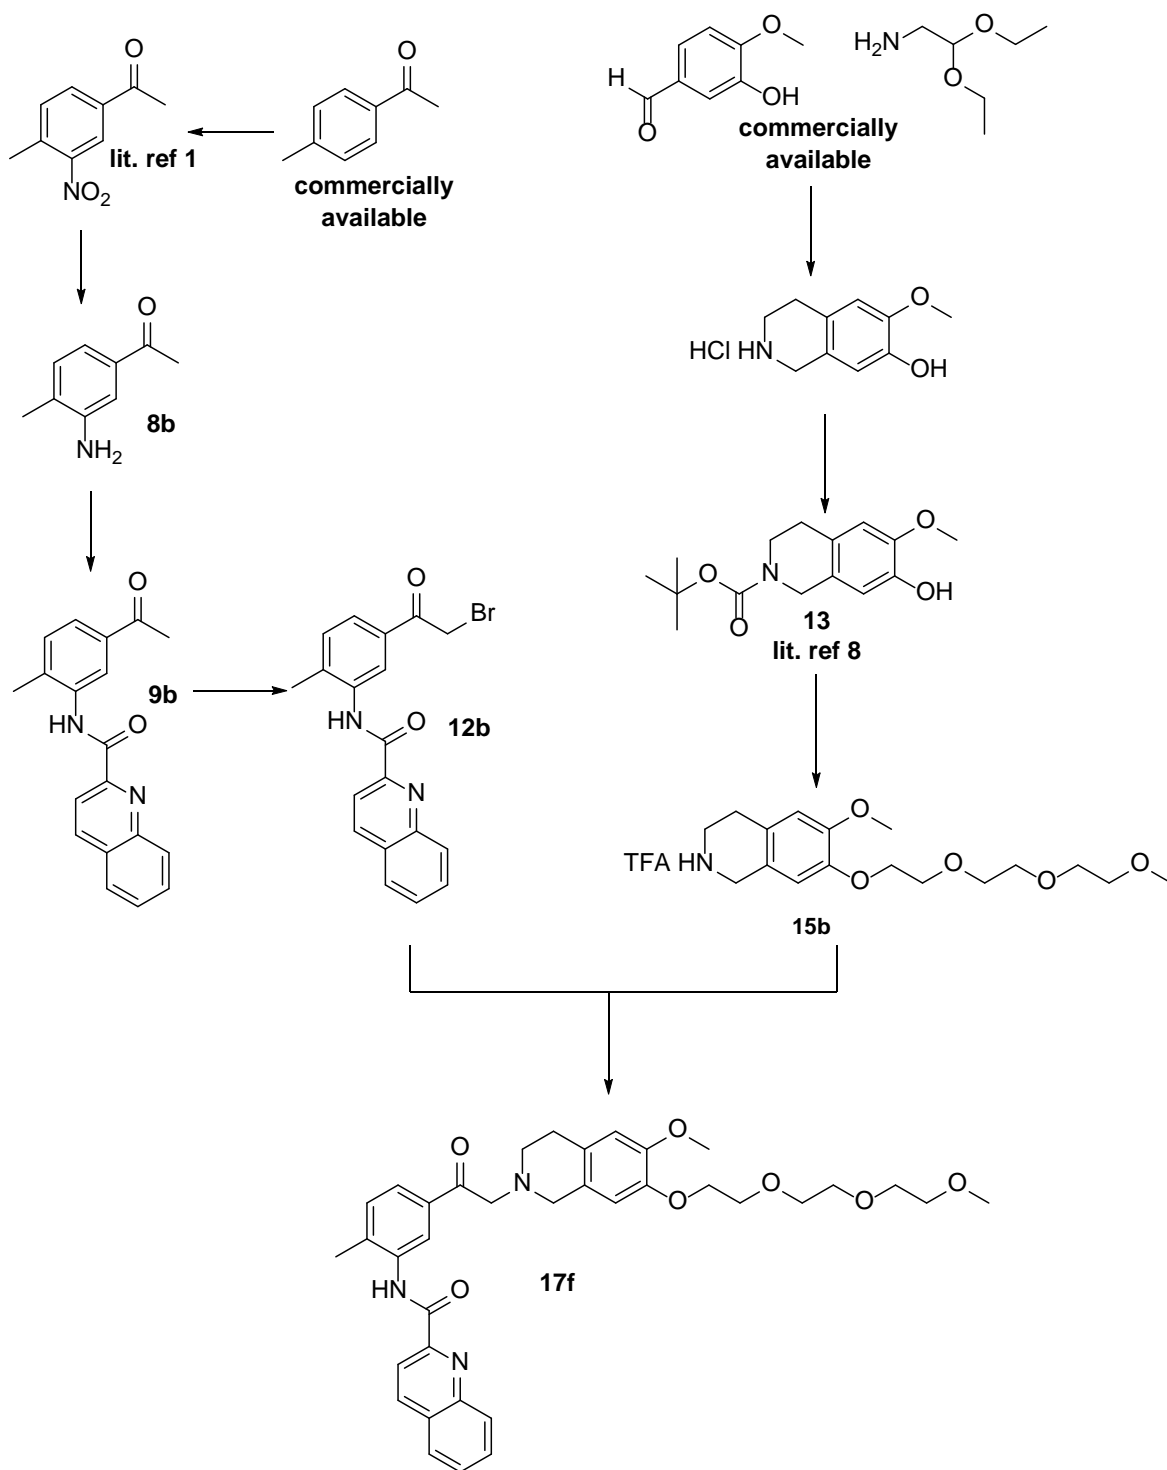

## 1.2 Reagents and devices

### Reagents and solvents

Reagents Commercial reagents were used as provided. Solvents were used in per analysis grade for reaction mixtures and industrial grade for chromatography.

#### 1.2.1 Devices

##### Automated Flash chromatography

Purification by column chromatography was performed with a Biotage® Isolera™ Spektra One device. Silica gel 60 M (40-63  $\mu$ M, Merck) for flash column chromatography was used.

##### Thin layer chromatography

Analytical TLC on silica gel coated alumina plates (MN TLC sheets ALUGRAM® Xtra SIL G/UV254) was used for monitoring reaction progress and product visualization was conducted with UV-light (254 and 366 nm), and staining with potassium permanganate or Ehrlich's reagent.<sup>3</sup>

##### Nuclear magnetic resonance spectroscopy

NMR spectra were recorded at room temperature on a Bruker Avance 9.4 Tesla ( $^1\text{H}$ : 400 MHz,  $^{13}\text{C}$ : 101 MHz) spectrometer with a Nanobay console and a BBFOPlus broadband ATMA probe or a Bruker Avance 600 ( $^1\text{H}$ : 600.1 MHz,  $^{13}\text{C}$ : 150 MHz) instrument. The chemical shifts were reported in  $\delta$  [ppm] relative to tetramethylsilane as external standard according to IUPAC recommendations. The relative number of protons was determined by integration. Coupling constants J were reported in Hertz [Hz]. Abbreviations for the characterization of the signals: s=singlet, d=doublet, t=triplet, m=multiplet, dd=doublet of doublets, q=quartet.

##### Mass spectrometry

High resolution mass spectra were recorded with an Agilent Tech 6540 UHD Accurate Mass Q-TOF LC/MS spectrometer.

##### Infrared spectroscopy

IR-spectra were recorded with a spectrometer FTIR Nicolete iS 10 (Thermo Fisher Scientific). Scans of 50 readings were performed by spectrum; the data were recorded in units of transmittance. The accessory ATR (PIKE) was used with a diamond crystal and an incidence angle of 45 °; samples were analyzed with the software IRsolution.

## Reversed phase high-performance liquid chromatography

Purification with preparative HPLC was performed on a system from Knauer (Berlin, Germany; two K-1800 pumps, a K-2001 detector set to 280 nm). Column: Nucleodur 100-5 C18 ec (250 × 21 mm, 5 μm, Macherey-Nagel, Düren, Germany). Solvents: Millipore water (with 0.1 % (v/v) TFA) / acetonitrile (gradient grade). Flow rate: 15 mL/min at 26 °C. The products were collected manually, acetonitrile was removed from the eluate under reduced pressure, and lyophilization furnished the corresponding TFA salts.

## Analytical high-performance liquid chromatography

The purity of all final compounds (dissolved in DMSO) was determined by analytical HPLC (integration of the UV signal at 220 nm wavelength) using of a 1220 Infinity LC System from Agilent equipped with a reverse phase Phenomenex Luna® 3μ C18(2) column (150 × 2.0 mm, 100 Å) thermostatted at 40 °C. HPLC conditions were the following: solvent A = water (Millipore)/TFA (0.05% v/v), solvent B = MeCN (Merck, gradient grade); flow rate = 0.3 mL/min; injection volume 1 μL, elution with a gradient of 10% to 95% B in 30 min.

## 1.3 Synthesis and characterization

**General procedure for the preparation of nitro compounds:** compounds were prepared according to known procedures [1].

### 1-(3-nitrophenyl)ethan-1-one

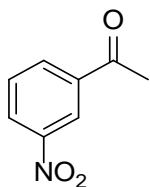

Light yellow solid (1.8 g, yield 50%, R<sub>f</sub> PE/EA 1:1 0.67). mp 75-78°C (76-78°C lit) [1]. **<sup>1</sup>H NMR (CDCl<sub>3</sub>, 400 MHz):** δ= 8.81 (d, <sup>4</sup>J=1.9 Hz, 1H, ArH), 8.46 (ddd, <sup>3</sup>J=8.2, <sup>4</sup>J=2.2, <sup>4</sup>J=1.1 Hz, 1H, ArH), 8.32 (d, <sup>3</sup>J=7.8 Hz, 1H, ArH), 7.72 (s, 1H, ArH), 2.72 (s, 3H, CH<sub>3</sub>CO). **<sup>13</sup>C NMR (CDCl<sub>3</sub>, 100 MHz):** δ= 195.8 (C<sub>quat</sub>), 147.0 (C<sub>quat</sub>), 138.4 (C<sub>quat</sub>), 133.7 (+), 129.9 (+), 127.4 (+), 123.2 (+), 26.7 (+). **IR (KBr) [cm<sup>-1</sup>]:** ν = 3237, 3090, 1691, 1520, 1428, 1348, 1250, 970, 821, 587.

### 1-(4-methyl-3-nitrophenyl)ethan-1-one

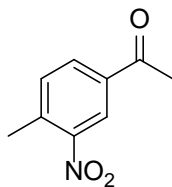

Yellow solid (1.5 g, yield 65%,  $R_f$  PE/EA 7:3 0.43). mp 60-62°C (60-61 lit) [2].  **$^1\text{H NMR}$  (400 MHz,  $\text{CDCl}_3$ ):**  $\delta$  8.52 (d,  $^3J=1.5$  Hz, 1H, ArH), 8.08 (dd,  $^3J=8.0$ ,  $^4J=1.5$  Hz, 1H, ArH), 7.47 (s, 1H, ArH), 2.67 (s, 3H,  $\text{CH}_3\text{CO}$ ), 2.65 (s, 3H,  $\text{CH}_3$ ).  **$^{13}\text{C NMR}$  (100 MHz,  $\text{CDCl}_3$ ):**  $\delta$  195.5 ( $\text{C}_{\text{quat}}$ ), 149.2 ( $\text{C}_{\text{quat}}$ ), 138.6 ( $\text{C}_{\text{quat}}$ ), 136.1 ( $\text{C}_{\text{quat}}$ ), 133.3 (+), 131.9 (+), 124.6 (+), 26.5 (+), 20.6 (+). **IR [ $\text{cm}^{-1}$ ]:**  $\nu$  = 1692, 1617, 1531, 1348, 1282, 1251, 833, 803.

**General procedure for the preparation of amino compounds (8a-b):** The respective nitro derivative (1 equiv) was dissolved in a mixture of ethanol and water (2:1), iron powder (10 equiv) and conc. HCl (0.05 mL) were added and the mixture was refluxed for 90 min. Ethyl acetate was added and the mixture was filtered over celite, dried over sodium sulfate, filtered again and the solvent evaporated, resulted the corresponding amino compound.

### 1-(3-aminophenyl)ethan-1-one (8a)

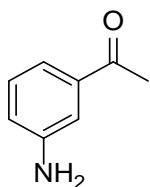

Light brown solid (1.2 g, yield 85%,  $R_f$  Pentane:EA 1:1 0.55). mp 93-95°C (94-98°C) [3].  **$^1\text{H NMR}$  ( $\text{CDCl}_3$ , 400 MHz):**  $\delta$  = 6.97 (t,  $^3J=7.7$  Hz, 1H, ArH), 6.90 (m, 1H, ArH), 6.85 (m, 1H, ArH) 6.50 (dd,  $^3J=7.8$ ,  $^4J=1.7$  Hz, 1H, ArH), 2.19 (s, 3H,  $\text{CH}_3\text{CO}$ ).  **$^{13}\text{C NMR}$  ( $\text{CDCl}_3$ , 100 MHz):**  $\delta$  = 198.6 ( $\text{C}_{\text{quat}}$ ), 146.7 ( $\text{C}_{\text{quat}}$ ), 138.1 ( $\text{C}_{\text{quat}}$ ), 129.4 (+), 119.7 (+), 118.9 (+), 114.0 (+), 26.7 (+). **IR (KBr) [ $\text{cm}^{-1}$ ]:**  $\nu$  = 3550, 3473, 3415, 3236, 2925, 2810, 1639, 1618, 1458, 1384, 1358, 1323, 1238, 870, 621.

### 1-(3-amino-4-methylphenyl)ethan-1-one (8b)

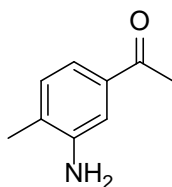



Brown solid (1.4 g, yield 93%,  $R_f$  Hex/EA 4:1 0.24). mp 78-80°C (80-81°C lit) [2].  $^1\text{H NMR}$  (400 MHz,  $\text{CDCl}_3$ ):  $\delta$  7.28 (dd,  $^3J=7.5$ ,  $^4J=2.0$  Hz, 1H, ArH), 7.27 (d,  $^3J=7.3$ , 1H, ArH), 7.12 (d,  $^3J=7.5$ , 1H, ArH), 2.54 (s, 3H,  $\text{COCH}_3$ ), 2.21 (s, 3H,  $\text{CH}_3$ ).  $^{13}\text{C NMR}$  (100 MHz,  $\text{CDCl}_3$ ):  $\delta$  198.3 ( $\text{C}_{\text{quat}}$ ), 144.8 ( $\text{C}_{\text{quat}}$ ), 136.2 ( $\text{C}_{\text{quat}}$ ), 130.4 ( $\text{C}_{\text{quat}}$ ), 128.0 (+), 119.1 (+), 113.8 (+), 26.5 (+), 17.5 (+). IR [ $\text{cm}^{-1}$ ]:  $\nu$  = 3367, 1672, 1573, 1422, 1356, 1291, 1237, 1199.

**General procedure for the amide formation (9a-b)[4]:** TsCl (1.2 equiv) and amine (8a-b) were added, in that order, at 0 °C under  $\text{N}_2$  to a flask containing quinaldic acid (1.2 equiv), triethylamine (2 equiv), and  $\text{CH}_2\text{Cl}_2$ , and the mixture was stirred at 40-50°C overnight. AcOH (5% aq.) was added to quench the reaction, the organic phase was separated and washed three times with water, dried over sodium sulfate, filtered again and the solvent evaporated. The obtained solid was washed with ether furnishing the desired product.

#### **N-(3-acetylphenyl)quinoline-2-carboxamide (9a)**

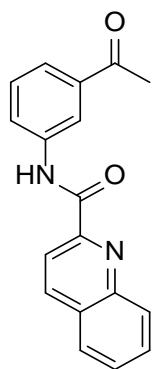

White solid (0.500 g, yield quant,  $R_f$  PE:EA 2:1 0.40).  $^1\text{H NMR}$  ( $\text{CDCl}_3$ , 400 MHz):  $\delta$  = 8.43 (s, 2H, quinol), 8.39 (t,  $^3J=1.9$  Hz, 1H, quinol), 8.25 (m, 2H, ArH), 7.96 (d,  $^3J=8.2$  Hz, 1H, quinol), 7.87 (t,  $^3J=8.3$  Hz, 1H, ArH), 7.79 (d,  $^3J=7.9$  Hz, 1H, ArH), 7.71 (t,  $^3J=7.5$  Hz, 1H, quinol), 7.56 (t,  $^3J=7.9$  Hz, 1H, quinol), 2.70 (s, 3H,  $\text{CH}_3$ ).  $^{13}\text{C NMR}$  ( $\text{CDCl}_3$ , 100 MHz):  $\delta$  = 197.8 ( $\text{C}_{\text{quat}}$ ), 162.3 ( $\text{C}_{\text{quat}}$ ), 149.1 ( $\text{C}_{\text{quat}}$ ), 146.1 ( $\text{C}_{\text{quat}}$ ), 138.3 ( $\text{C}_{\text{quat}}$ ), 138.1 ( $\text{C}_{\text{quat}}$ ), 137.9 ( $\text{C}_{\text{quat}}$ ), 130.5 (+), 129.5 (+), 129.5 (+), 129.4 (+), 128.4 (+), 127.8 (+), 124.2 (+), 124.1 (+), 119.3 (+), 118.7 (+), 26.7 (+). IR (KBr) [ $\text{cm}^{-1}$ ]:  $\nu$  = 3483, 3416, 3341, 3082, 2923, 1687, 1591, 1530, 1504, 1442, 1365, 1295, 1126, 955, 846, 774, 686, 584. HRMS (EI-MS) calcd. For  $\text{C}_{18}\text{H}_{15}\text{N}_2\text{O}_2$  [ $\text{M}+\text{H}$ ] $^+$ : 291.1133; found [ $\text{M}+\text{H}$ ] $^+$ : 291.1128.

## N-(5-acetyl-2-methylphenyl)quinoline-2-carboxamide (9b)

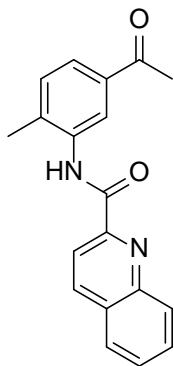

Light yellow solid (0.700 g, yield quant,  $R_f$  PE/EA 2:1 0.52).  **$^1\text{H NMR}$  (400 MHz,  $\text{CDCl}_3$ ):**  $\delta$  8.95 (d,  $^3J=7.7$  Hz, 1H, quinol), 8.40 (s, 2H, ArH quinol), 8.17 (d,  $^3J=8.5$  Hz, 1H, ArH), 7.93 (d,  $^3J=9.0$  Hz, 1H, quinol), 7.82 (ddd,  $^3J=8.4$ ,  $^3J=6.9$  Hz, 1H, quinol), 7.73 (dd,  $^3J=7.9$ , 1H, ArH), 7.67 (ddd,  $^3J=8.1$ ,  $^3J=6.9$  Hz, 1H, quinol), 7.35 (d,  $^3J=7.9$  Hz, 1H, quinol), 2.65 (s, 3H,  $\text{CH}_3$ ), 2.55 (s, 3H,  $\text{COCH}_3$ ).  **$^{13}\text{C NMR}$  (100 MHz,  $\text{CDCl}_3$ ):**  $\delta$  = 197.8 ( $\text{C}_{\text{quat}}$ ), 162.2 ( $\text{C}_{\text{quat}}$ ), 149.5 ( $\text{C}_{\text{quat}}$ ), 146.2 ( $\text{C}_{\text{quat}}$ ), 138.0 ( $\text{C}_{\text{quat}}$ ), 136.2 ( $\text{C}_{\text{quat}}$ ), 133.5 ( $\text{C}_{\text{quat}}$ ), 130.7 ( $\text{C}_{\text{quat}}$ ), 130.4 (+), 129.8 (+), 129.5 (+), 128.3 (+), 127.8 (+), 124.1 (+), 121.5 (+), 118.6 (+), 26.7 (+), 18.0 (+). **IR [ $\text{cm}^{-1}$ ]:**  $\nu$  = 3420, 3050, 2910, 1670, 1580, 1410, 1350, 1220, 1080, 760. **HRMS (EI-MS)** calcd. For  $\text{C}_{19}\text{H}_{17}\text{N}_2\text{O}_2$   $[\text{M}+\text{H}]^+$ : 305.1290; found  $[\text{M}+\text{H}]^+$ : 305.1285.

**General procedure for the bromination of ketones 12a-b [5]:** To a solution of acetophenone (10 mmol) in methanol at reflux conditions were added 10% (w/w) silica gel and slowly N-bromosuccinimide (12 mmol), the progress of the reaction was monitored by TLC until the disappearance of the substrate. The reaction was filtered after the completion of the reaction. The filtrate was concentrated under vacuum and the solid was washed twice with distilled water, then aqueous sodium thiosulfate was added to quench the reaction and the product was extracted with dichloromethane, organic layers were collected and washed thrice with water, dried over anhydrous  $\text{Na}_2\text{SO}_4$ , filtered and concentrated to give the desired product.

### N-(3-(2-bromoacetyl)phenyl)quinoline-2-carboxamide (12a)

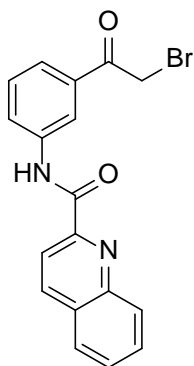

White solid (0.500 g, yield 84%,  $R_f$  PE:EA 2:1 0.67).  $^1\text{H NMR}$  ( $\text{CDCl}_3$ , 400 MHz):  $\delta$  8.46 (t,  $^3J=7.9$  Hz, 1H, quinol), 8.42 (s, 1H, quinol), 8.27 (d,  $^3J=8.5$  Hz, 1H, ArH), 8.22 (d,  $^3J=7.7$  Hz, 1H, quinol), 7.95 (d,  $^3J=8.2$  Hz, 1H, quinol), 7.86 (ddd,  $^3J=8.4$ ,  $^3J=6.9$  Hz, 1H, ArH), 7.81 (m, 1H, quinol), 7.72 (m, 2H, ArH), 7.56 (t,  $^3J=7.9$  Hz, 1H, quinol), 4.54 (s, 2H,  $\text{CH}_2\text{Br}$ ).  $^{13}\text{C NMR}$  ( $\text{CDCl}_3$ , 100 MHz):  $\delta$  191.0 ( $\text{C}_{\text{quat}}$ ), 162.2 ( $\text{C}_{\text{quat}}$ ), 148.9 ( $\text{C}_{\text{quat}}$ ), 145.9 ( $\text{C}_{\text{quat}}$ ), 138.5 ( $\text{C}_{\text{quat}}$ ), 138.4 ( $\text{C}_{\text{quat}}$ ), 134.8 (+), 130.8 (+), 129.7 (+), 128.6 (+), 127.9 (+), 125.0 (+), 124.7 (+), 119.8 (+), 118.8 (+), 31.1 (-). IR (KBr) [ $\text{cm}^{-1}$ ]:  $\nu$  =3483, 3416, 3341, 3082, 2923, 1687, 1591, 1530, 1504, 1442, 1365, 1295, 1126, 955, 846, 774, 686, 584. HRMS (EI-MS) calcd. For  $\text{C}_{18}\text{H}_{14}\text{BrN}_2\text{O}_2$   $[\text{M}+\text{H}]^+$ : 369.0238; found  $[\text{M}+\text{H}]^+$ : 369.0233.

### N-(5-(2-bromoacetyl)-2-methylphenyl)quinoline-2-carboxamide (12b)

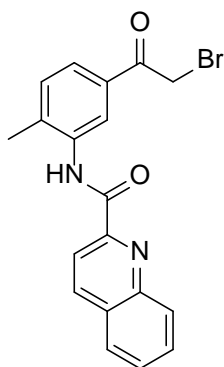

Light yellow solid (0.720 g, yield 77%,  $R_f$  PE:EA 2:1 0.59).  $^1\text{H NMR}$  ( $\text{CDCl}_3$ , 400 MHz):  $\delta$  9.02 (d,  $^3J=1.7$  Hz, 1H, quinol), 8.41 (s, 1H, quinol), 8.18 (d,  $^3J=8.5$  Hz, 1H, ArH), 7.94 (d,  $^3J=8.2$  Hz, 1H, quinol), 7.86 (m, 1H, quinol), 7.77 (d,  $^3J=7.9$  Hz, 2H, ArH), 7.68 (dd,  $^3J=8.1$ ,  $^3J=7.0$  Hz, 1H, quinol), 7.39 (d,  $^3J=7.9$  Hz, 1H, quinol), 4.54 (s, 2H,  $\text{CH}_2\text{Br}$ ), 2.57 (s, 3H,  $\text{CH}_3$ ).  $^{13}\text{C NMR}$  ( $\text{CDCl}_3$ , 100 MHz):  $\delta$  192.6 ( $\text{C}_{\text{quat}}$ ), 162.3 ( $\text{C}_{\text{quat}}$ ), 149.6 ( $\text{C}_{\text{quat}}$ ), 146.6 ( $\text{C}_{\text{quat}}$ ), 138.1 ( $\text{C}_{\text{quat}}$ ), 136.4 ( $\text{C}_{\text{quat}}$ ), 134.8 ( $\text{C}_{\text{quat}}$ ), 133.3 (+), 131.1 (+), 130.5 (+), 129.8 (+), 129.6 (+), 128.4 (+), 127.9 (+), 124.8 (+), 121.9 (+), 118.7 (+), 31.4 (-), 20.6 (+). IR

(KBr) [cm<sup>-1</sup>]:  $\nu$  3483, 3416, 3341, 3082, 2923, 1687, 1591, 1530, 1504, 1442, 1365, 1295, 1126, 955, 846, 774, 686, 584. HRMS (EI-MS) calcd. For C<sub>19</sub>H<sub>16</sub>BrN<sub>2</sub>O<sub>2</sub> [M+H]<sup>+</sup>: 383.0395; found [M+H]<sup>+</sup>: 383.0396.

#### 4-(2-hydroxyethoxy)benzaldehyde

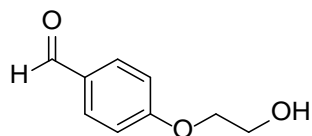

4-(2-hydroxyethoxy)benzaldehyde has already been described [6]. Colorless oil (1.2 g, yield 85%, R<sub>f</sub> Hex:EA 1:1 0.20), <sup>1</sup>H NMR (CDCl<sub>3</sub>, 400 MHz):  $\delta$ = 7.45 (d, <sup>3</sup>J=8.9 Hz, 2H, OCH<sub>2</sub>CH<sub>2</sub>), 6.64 (d, <sup>3</sup>J=8.7 Hz, 2H, OCH<sub>2</sub>CH<sub>2</sub>), 3.79 (t, <sup>3</sup>J=9.0 Hz, 2H, OCH<sub>2</sub>), 3.73 (t, <sup>3</sup>J=9.3 Hz, 2H, CH<sub>2</sub>OH). <sup>13</sup>C NMR (CDCl<sub>3</sub>, 100 MHz):  $\delta$ = 190.99 (C<sub>quat</sub>), 163.72 (C<sub>quat</sub>), 131.80 (C<sub>quat</sub>), 130.10 (+), 114.82 (+), 69.55 (-), 61.21 (-). IR [cm<sup>-1</sup>]:  $\nu$  = 3443, 3274, 2873, 2842, 2747, 1690, 1580, 1427, 1044, 916, 653.

#### 2-(4-formylphenoxy)ethyl 4-methylbenzenesulfonate (10)

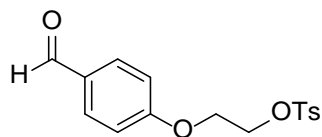

Compound **3** has already been described [7] Light pink solid (0.700 g, yield 84%, R<sub>f</sub> Pen: EA 1:1 0.62). mp: 102-104°C (103-105°C lit).[7] <sup>1</sup>H NMR (CDCl<sub>3</sub>, 400 MHz):  $\delta$ = 7.83 (d, <sup>3</sup>J=2.5 Hz, 2H, ArH), 7.81 (d, <sup>3</sup>J=7.0 Hz, 2H, ArH), 7.36 (d, <sup>3</sup>J=8.1 Hz, 2H, ArH), 6.91 (d, <sup>3</sup>J=8.7 Hz, 2H, ArH), 4.42 (m, 2H, OCH<sub>2</sub>), 4.25 (m, 2H, CH<sub>2</sub>OSO<sub>2</sub>), 2.46 (s, 3H, CH<sub>3</sub>). <sup>13</sup>C NMR (CDCl<sub>3</sub>, 100 MHz):  $\delta$ = 190.6 (C<sub>quat</sub>), 162.8 (C<sub>quat</sub>), 145.1 (C<sub>quat</sub>), 127.9 (C<sub>quat</sub>), 128.0 (C<sub>quat</sub>), 129.9 (+), 129.9 (+), 130.4 (+), 131.8 (+), 131.9 (+), 132.8 (+), 114.7 (+), 114.7 (+), 67.6 (-), 65.6 (-), 21.6 (+). IR (KBr) [cm<sup>-1</sup>]:  $\nu$  =3254, 2830, 2750, 1698, 1603, 1508, 1271, 1015, 915, 665.

#### tert-butyl 7-hydroxy-6-methoxy-3,4-dihydroisoquinoline-2(1H)-carboxylate (13)

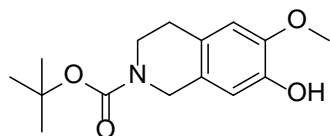

1,2,3,4-Tetrahydroisoquinoline-6,7-diol hydrochloride (1 mmol) and triethylamine (2.5 equiv) were dissolved in 10 mL of dry DCM, the mixture was cooled in an ice bath and di-tert-butyl dicarbonate (1 equiv) was added slowly. The mixture was stirred at room temperature overnight, and then washed with water and brine, dried over magnesium sulphate, filtered and the solvent evaporated. The compound

was purified by column chromatography (PE:EA 2:1), white solid (3.0 g, yield 89%,  $R_f$  PE:EA 1:1 0.55). mp 124-126 °C (123.6-124.2°C lit).[8]  **$^1\text{H NMR}$  ( $\text{CDCl}_3$ , 400 MHz):**  $\delta$ = 6.85 (s, 1H, ArH), 6.70 (s, 1H, ArH), 4.47 (s, 2H,  $\text{NCH}_2$ ), 3.81 (s, 3H,  $\text{OCH}_3$ ), 3.60 (m, 2H,  $\text{NCH}_2\text{CH}_2$ ), 2.75 (t,  $^3J=5.6$  Hz, 2H,  $\text{NCH}_2\text{CH}_2$ ), 1.48 (s, 9H,  $\text{C}(\text{CH}_3)_3$ )  **$^{13}\text{C NMR}$  ( $\text{CDCl}_3$ , 100 MHz):**  $\delta$ = 154.8 ( $\text{C}_{\text{quat}}$ ), 151.7 ( $\text{C}_{\text{quat}}$ ), 149.5 ( $\text{C}_{\text{quat}}$ ), 138.5 ( $\text{C}_{\text{quat}}$ ), 133.1 ( $\text{C}_{\text{quat}}$ ), 120.1 (+), 112.5 (+), 83.4 ( $\text{C}_{\text{quat}}$ ), 56.0 (+), 45.1 (-), 40.4 (-), 28.9 (-), 28.4 (+). **IR (KBr) [ $\text{cm}^{-1}$ ]:**  $\nu$  = 3024, 2976, 1685.

### 2-methoxyethyl 4-methylbenzenesulfonate[9]

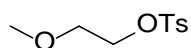

A solution of 4-toluenesulfonyl chloride (0.06 mol) in dichloromethane was added drop-wise to a solution of (2-methoxyethoxy)ethanol (0.057 mol) and triethylamine (0.114 mol) in dichloromethane at 0°C under a nitrogen atmosphere. The formation of a white precipitate was observed. The reaction mixture was stirred at room temperature for 18h and then poured into water (50 mL). The aqueous layer was extracted with dichloromethane. The organic layers were combined and washed with 3M HCl (50 mL), saturated solution of sodium bicarbonate (50 mL), and water (50 mL). The organic phase was dried over magnesium sulfate, filtered and the solvent was removed in vacuo. Pale yellow oil (1.45 g, yield 100%).  **$^1\text{H NMR}$  ( $\text{CD}_3\text{OD}$ , 400 MHz):**  $\delta$ = 7.82 (d,  $^3J=8.3$  Hz, 2H, ArH), 7.36 (d,  $^3J=8.0$  Hz, 2H, ArH), 4.17 (d,  $^3J=1.2$  Hz, 2H,  $\text{OCH}_2\text{CH}_2$ ), 3.60 (s, 2H,  $\text{CH}_2\text{OCH}_3$ ), 3.32 (s, 3H,  $\text{CH}_3$ ), 2.46 (s, 3H,  $\text{OCH}_3$ ).  **$^{13}\text{C NMR}$  ( $\text{CD}_3\text{OD}$ , 100 MHz):**  $\delta$ = 140.87 ( $\text{C}_{\text{quat}}$ ), 129.12 ( $\text{C}_{\text{quat}}$ ), 125.87 (+), 124.03 (+), 65.99 (-), 65.11 (-), 55.06 (+), 17.68 (+). **IR (KBr) [ $\text{cm}^{-1}$ ]:**  $\nu$  = 3070, 2928, 2822, 1598, 1495, 1356, 1311, 1018, 817, 689.

### 2-(2-(2-methoxyethoxy)ethoxy)ethyl 4-methylbenzenesulfonate

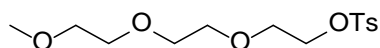

2-(2-(2-methoxyethoxy)ethoxy)ethyl 4-methylbenzenesulfonate was prepared according to known procedures [9]. Pale yellow oil (2.0 g, yield 100%).  **$^1\text{H NMR}$  ( $\text{CD}_3\text{OD}$ , 400 MHz):**  $\delta$ = 7.77 (d,  $^3J=8.3$ , 2H, tosyl), 7.32 (d,  $^3J=8.2$ , 2H, tosyl), 4.13 (t,  $^3J=4.8$ , 2H,  $\text{CH}_2$  PEG), 3.66 (t,  $^4J=4.8$ , 2H,  $\text{CH}_2$  PEG), 3.55 (m, 6H, 3 $\text{CH}_2$  PEG), 3.48 (m, 2H,  $\text{CH}_2$  PEG), 3.36 (s, 3H,  $\text{OCH}_3$ ), 2.43 (s, 3H,  $\text{CH}_3$  tosyl).

### 6-methoxy-7-(2-methoxyethoxy)-1,2,3,4-tetrahydroisoquinoline-2,2,2-trifluoroacetate (15a)

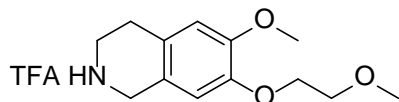

Compound **7a** was prepared according to known procedures with slight modifications [8]. (quantitative yield,  $R_f$  DCM:MeOH 19:1 0.50).  **$^1\text{H NMR}$  ( $\text{CD}_3\text{OD}$ , 400 MHz):**  $\delta$ = 6.81 (s, 1H, ArH), 6.79 (s, 1H, ArH), 4.25 (s, 2H,  $\text{CH}_2$ ), 4.12 (m, 2H,  $\text{CH}_2$ ), 3.82 (s, 3H,  $\text{CH}_3$ ), 3.76 (m, 2H,  $\text{CH}_2$ ), 3.46 (t,  $^3J=6.4$  Hz, 2H,  $\text{CH}_2$ ), 3.41 (s, 3H,  $\text{CH}_3$ ), 3.04 (t,  $^3J=6.3$  Hz, 2H,  $\text{CH}_2$ ).  **$^{13}\text{C NMR}$  ( $\text{CD}_3\text{OD}$ , 100 MHz):**  $\delta$ = 149.6 ( $\text{C}_{\text{quat}}$ ), 147.6 ( $\text{C}_{\text{quat}}$ ), 124.0 ( $\text{C}_{\text{quat}}$ ), 119.6 ( $\text{C}_{\text{quat}}$ ), 111.6 (+), 70.7 (-), 68.4 (-), 57.8 (+), 55.0 (+), 44.0 (-), 41.5 (-), 24.2 (-). **HRMS (EI-MS)** calcd. For  $\text{C}_{15}\text{H}_{21}\text{F}_3\text{NO}_5$   $[\text{M}+\text{H}]^+$ : 352.1371; found  $[\text{M}+\text{H}]^+$ : 352.1347.

### 6-methoxy-7-(2-(2-(2-methoxyethoxy)ethoxy)ethoxy)-1,2,3,4-tetrahydroisoquinoline-2,2,2-trifluoroacetate (15b)

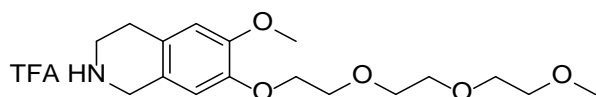

Compound **7b** was prepared according to known procedures with slight modifications [8]. Sticky brown solid (Yield 79%,  $R_f$  DCM:MeOH 19:1 0.46).  **$^1\text{H NMR}$  ( $\text{CDCl}_3$ , 400 MHz):**  $\delta$ = 6.60 (s, 1H, CH THIQ), 6.57 (s, 1H, CH THIQ), 4.39 (s, 2H,  $\text{NCH}_2$  THIQ), 4.06 (t,  $^3J=5.04$  Hz, 4H,  $\text{CH}_2$  PEG), 3.77 (t,  $^3J=5.1$  Hz, 4H, 2 $\text{CH}_2$  PEG), 3.65 (m, 4H, 2 $\text{CH}_2$  PEG), 3.56 (m, 8H, 4 $\text{CH}_2$  PEG), 3.51 (m, 2H,  $\text{CH}_2$  THIQ), 3.46 (m, 4H,  $\text{CH}_2$  PEG), 3.30 (s, 6H, 2 $\text{OCH}_3$ ), 2.65 (t,  $^3J=5.3$  Hz, 2H,  $\text{CH}_2$  THIQ).  **$^{13}\text{C NMR}$  ( $\text{CDCl}_3$ , 100 MHz):**  $\delta$ = 154.8 (+), 147.5 ( $\text{C}_{\text{quat}}$ ), 147.4 ( $\text{C}_{\text{quat}}$ ), 127.5 ( $\text{C}_{\text{quat}}$ ), 126.2 ( $\text{C}_{\text{quat}}$ ), 115.0 (+), 112.7 (+), 79.7 ( $\text{C}_{\text{quat}}$ ), 71.9 (-), 70.78 (-), 70.6 (-), 70.5 (-), 69.6 (-), 69.0 (-), 69.0 (-), 59.0 (+), 45.5 (-), 44.8 (+), 41.9 (-), 40.6 (-), 28.4 (+), 28.4 (-). **IR (KBr)  $[\text{cm}^{-1}]$ :**  $\nu$  = 2920, 2875, 1670.

**General procedure for the chalcone formation (11a-b):** Chalcones were obtained by a Claisen-Schmidt condensation. The ketone **9a-b** (1equiv) and aldehyde **10** (1.3 equiv) were mixed and heated for 2 hours at 80 °C, then the mixture was allowed to reach room temperature and at 0 °C and 1 mL of NaOH 30% was added slowly. After 24 h at room temperature, ice was added to the mixture; the product was filtered and dried.

**(E)-2-(4-(3-oxo-3-(3-(quinoline-2-carboxamido)phenyl)prop-1-en-1-yl)phenoxy)ethyl 4-methylbenzenesulfonate (11a)** **4-**

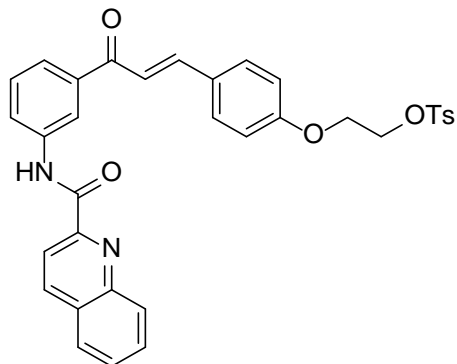

Pale yellow solid (0.400 g, yield 72%,  $R_f$  Hex:EA 2:1 0.47).  **$^1\text{H NMR}$  (400 MHz,  $\text{CDCl}_3$ ):**  $\delta$  8.40 (d,  $^3J=8.3$  Hz, 2H, ArH), 8.23 (t,  $^3J=9.0$  Hz, 2H, ArH), 7.93 (d,  $^3J=8.2$  Hz, 1H, ArH), 7.84 (m, 5H, ArH), 7.67 (t,  $^3J=7.5$  Hz, 1H, quinol), 7.60 (m, 2H, ArH), 7.55 (s, 1H, ArH), 7.47 (d,  $^3J=15.6$  Hz, 1H, COCH), 7.35 (d,  $^3J=8.0$  Hz, 2H, tosyl), 6.83 (d,  $^3J=7.7$  Hz, 2H, ArH), 4.44 (t,  $^3J=4.0$  Hz, 2H,  $\text{ArOCH}_2$ ), 4.37 (t,  $^3J=4.1$  Hz, 2H,  $\text{CH}_2\text{OSO}_2$ ), 2.45 (s, 3H,  $\text{CH}_3$  Tosyl).  **$^{13}\text{C NMR}$  (100 MHz,  $\text{CDCl}_3$ ):**  $\delta$  190.0 ( $\text{C}_{\text{quat}}$ ), 162.4 ( $\text{C}_{\text{quat}}$ ), 160.0 (+), 158.3 ( $\text{C}_{\text{quat}}$ ), 154.7 ( $\text{C}_{\text{quat}}$ ), 147.6 ( $\text{C}_{\text{quat}}$ ), 145.0 (+), 143.8 ( $\text{C}_{\text{quat}}$ ), 142.1 ( $\text{C}_{\text{quat}}$ ), 141.6 ( $\text{C}_{\text{quat}}$ ), 139.3 ( $\text{C}_{\text{quat}}$ ), 138.9 ( $\text{C}_{\text{quat}}$ ), 137.8 (+), 132.9 (+), 131.5 ( $\text{C}_{\text{quat}}$ ), 130.5 (+), 130.3 (+), 129.9 (+), 129.7 (+), 129.5 (+), 128.3 (+), 127.9 (+), 124.4 (+), 114.9 (+), 67.8 (-), 65.5 (-), 21.6 (+). **IR (KBr) [ $\text{cm}^{-1}$ ]:**  $\nu$  = 1640, 1710, 730. **HRMS (EI-MS)** calcd. For  $\text{C}_{34}\text{H}_{29}\text{N}_2\text{O}_6\text{S}$   $[\text{M}+\text{H}]^+$ : 593.1746; found  $[\text{M}+\text{H}]^+$ : 593.1729.

**(E)-2-(4-(3-(4-methyl-3-(quinoline-2-carboxamido)phenyl)-3-oxoprop-1-en-1-yl)phenoxy)ethyl 4-methylbenzenesulfonate (11b)**

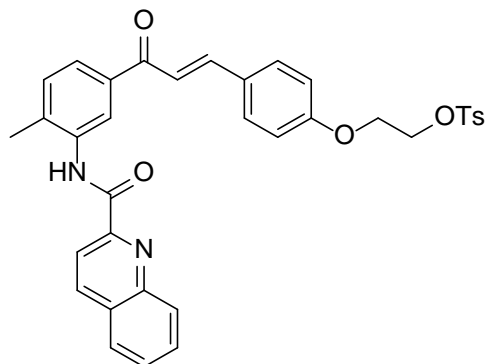

Yellow solid. (0.600 g, yield 80%,  $R_f$  Hex:EA 2:1 0.50).  **$^1\text{H-NMR}$  (400 MHz,  $\text{CDCl}_3$ ):**  $\delta$  9.00 (s, 1H, quinol), 8.42 (m, 2H, quinol), 8.18 (d,  $^3J=8.4$  Hz, 1H, ArH), 7.94 (d,  $^3J=8.2$  Hz, 1H, quinol), 7.89 (m, 2H, ArH), 7.68 (t,  $^3J=7.6$  Hz, 2H, quinol), 7.60 (d,  $^3J=8.7$  Hz, 2H, ArH), 7.50 (d,  $^3J=15.6$  Hz, 1H, COCH), 7.35 (d,  $^3J=8.1$  Hz, 2H, tosyl), 6.81 (d,  $^3J=8.7$  Hz, 2H, ArH), 4.39 (t,  $^3J=5.5$  Hz, 2H,  $\text{OCH}_2\text{CH}_2$ ), 4.20 (t,  $^3J=5.6$  Hz, 2H,  $\text{CH}_2\text{OSO}_2$ ), 2.58 (s, 3H,  $\text{CH}_3$  tosyl), 2.45 (s, 3H,  $\text{CH}_3$ ).  **$^{13}\text{C-NMR}$  (101 MHz,  $\text{CDCl}_3$ ):**  $\delta$  190.6 ( $\text{C}_{\text{quat}}$ ), 162.3 ( $\text{C}_{\text{quat}}$ ), 146.3 ( $\text{C}_{\text{quat}}$ ), 138.0 ( $\text{C}_{\text{quat}}$ ), 136.2 ( $\text{C}_{\text{quat}}$ ), 133.6 ( $\text{C}_{\text{quat}}$ ), 131.9 ( $\text{C}_{\text{quat}}$ ), 130.7 ( $\text{C}_{\text{quat}}$ ), 130.4 ( $\text{C}_{\text{quat}}$ ), 129.9 (+), 129.8 ( $\text{C}_{\text{quat}}$ ), 129.6 ( $\text{C}_{\text{quat}}$ ), 129.4 (+), 128.3 (+), 128.0 (+), 127.8 (+), 127.9 (+), 124.1 (+), 121.6 (+), 118.7 (+), 114.7 (+), 67.6 (-), 65.6 (-), 26.7 (+), 21.6 (+). **IR (KBr) [ $\text{cm}^{-1}$ ]:**  $\nu$  = 1635, 1693, 735. **HRMS (EI-MS)** calcd. For  $\text{C}_{34}\text{H}_{29}\text{N}_2\text{O}_6\text{S}$   $[\text{M}+\text{H}]^+$ : 607.1902; found  $[\text{M}+\text{H}]^+$ : 607.1906.

**General procedure for the preparation of compounds 16a-f:** A mixture of **11a-b** (1 mol), 1,2,3,4-tetrahydroisoquinoline **14**, **15a-b** (1.3 equiv) and  $\text{K}_2\text{CO}_3$  (3 equiv) was refluxed in  $\text{CH}_3\text{CN}$  overnight. The solvent was evaporated, water was added and the compound was extracted with DCM, organic layer was separated, dried with  $\text{Na}_2\text{SO}_4$ , filtered and the solvent evaporated to give the crude product. Compounds were purified, first, with a flash column chromatography (DCM:MeOH) and second, reverse column chromatography and in some cases a preparative HPLC.

**(E)-N-(3-(3-(4-(2-(6,7-dimethoxy-3,4-dihydroisoquinolin-2(1H)-yl)ethoxy)phenyl)acryloyl)phenyl)quinoline-2-carboxamide (16a)**

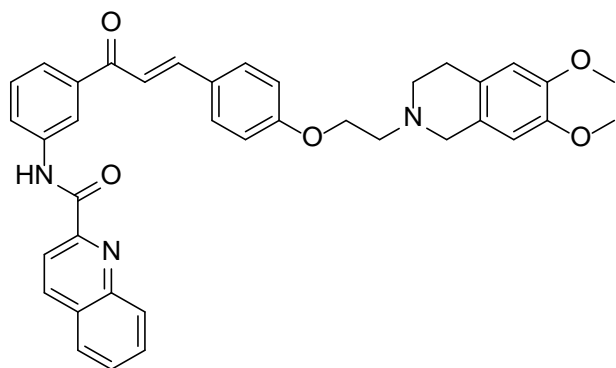

Yellow solid (0.030 g, yield 54%,  $R_f$  DCM:MeOH 20:1 0.42).  **$^1\text{H-NMR}$  (400 MHz,  $\text{CDCl}_3$ ):**  $\delta$  8.38 (m, 3H, quinol), 8.24 (m, 2H, ArH), 7.93 (m, 2H, quinol), 7.80 (m, 2H, ArH), 7.69 (m, 1H, quinol), 7.52 (d,  $^3J=15.5$  Hz, 1H,  $\text{C}_\alpha\text{COCH}$ ), 6.96 (d,  $^3J=8.5$  Hz, 2H, ArH), 6.65 (s, 1H, CH THIQ), 6.54 (s, 1H, CH THIQ), 4.53 (s, 2H,  $\text{CH}_2$  THIQ), 3.87 (s, 3H,  $\text{OCH}_3$ ), 3.85 (s, 3H,  $\text{OCH}_3$ ), 3.81 (s, 2H,  $\text{CH}_2$  THIQ), 3.65 (m, 2H,  $\text{CH}_2$  THIQ), 3.42 (m, 2H,  $\text{OCH}_2\text{CH}_2$ ), 2.65 (m, 2H,  $\text{CH}_2$  THIQ).  **$^{13}\text{C-NMR}$  (100 MHz,  $\text{CDCl}_3$ ):**  $\delta$  190.0 ( $\text{C}_{\text{quat}}$ ), 162.5 ( $\text{C}_{\text{quat}}$ ), 159.1 ( $\text{C}_{\text{quat}}$ ), 149.2 ( $\text{C}_{\text{quat}}$ ), 148.6 ( $\text{C}_{\text{quat}}$ ), 146.3 ( $\text{C}_{\text{quat}}$ ), 144.4 (+), 139.1 ( $\text{C}_{\text{quat}}$ ), 138.3 ( $\text{C}_{\text{quat}}$ ), 138.0 ( $\text{C}_{\text{quat}}$ ), 130.5 (+), 129.6 (+), 129.0 (+), 128.3 ( $\text{C}_{\text{quat}}$ ), 127.8 (+), 124.3 (+), 123.9 ( $\text{C}_{\text{quat}}$ ), 122.2 (+), 120.5 (+), 119.5 (+), 118.4 (+), 118.2 (+), 115.0 (+), 109.2 (+), 63.2 (-), 56.0 (+), 53.0 (-), 49.6 (-), 23.8



(-). IR (KBr) [cm-1]:  $\nu$  = 3137, 2810, 1642, 1689, 1660, 1140, 693. HRMS (EI-MS) calcd. For  $C_{38}H_{36}N_3O_5$  [M+H]<sup>+</sup>: 614.2655; found [M+H]<sup>+</sup>: 614.2657.

**(E)-N-(3-(3-(4-(2-(6-methoxy-7-(2-methoxyethoxy)-3,4-dihydroisoquinolin-2(1H)-yl)ethoxy)phenyl)acryloyl)phenyl)quinoline-2-carboxamide (16b)**

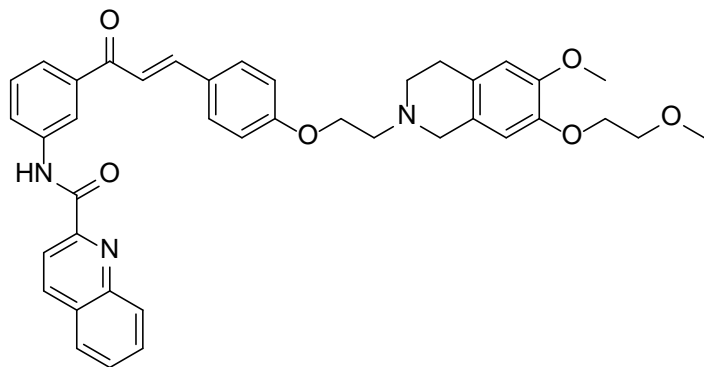

Pale yellow solid. (0.032 g, yield 63%,  $R_f$  DCM:MeOH 20:1 0.39). <sup>1</sup>H NMR (400 MHz, CDCl<sub>3</sub>):  $\delta$  8.43 (m, 2H, quinol), 8.22 (d, <sup>3</sup>J=8.4 Hz, 2H, ArH), 7.92 (d, <sup>3</sup>J=8.5 Hz, 1H, quinol), 7.87 (m, 2H, ArH), 7.63 (s, 2H, quinol), 7.55 (d, <sup>3</sup>J=15.7 Hz, 1H, COCH), 7.46 (t, <sup>3</sup>J=7.5 Hz, 1H, ArH), 6.96 (s, 1H, CH THIQ), 6.58 (s, 1H, CH THIQ), 4.28 (m, 2H, CH<sub>2</sub> PEG), 4.17 (m, 2H, CH<sub>2</sub> THIQ), 4.02 (m, 2H, OCH<sub>2</sub>CH<sub>2</sub>), 3.80 (s, 3H, OCH<sub>3</sub>), 3.73 (m, 2H, CH<sub>2</sub>CH<sub>2</sub>O), 3.60 (m, 2H, CH<sub>2</sub> THIQ), 3.44 (s, 3H, CH<sub>2</sub>OCH<sub>3</sub>), 2.86 (m, 2H, CH<sub>2</sub> PEG), 2.44 (d, <sup>3</sup>J=3.8 Hz, 2H, CH<sub>2</sub> THIQ). <sup>13</sup>C NMR (100 MHz, CDCl<sub>3</sub>):  $\delta$  190.1 (C<sub>quat</sub>), 162.5 (C<sub>quat</sub>), 159.3 (C<sub>quat</sub>), 154.5 (C<sub>quat</sub>), 149.3 (C<sub>quat</sub>), 146.3 (C<sub>quat</sub>), 144.9 (+), 140.0 (C<sub>quat</sub>), 139.3 (C<sub>quat</sub>), 138.3 (C<sub>quat</sub>), 138.0 (+), 132.0 (+), 130.4 (+), 130.2 (C<sub>quat</sub>), 128.3 (+), 128.0 (+), 124.2 (C<sub>quat</sub>), 119.8 (+), 119.4 (+), 118.7 (+), 115.0 (+), 71.0 (-), 68.6 (-), 65.7 (-), 59.1 (+), 58.9 (+), 55.9 (-), 51.3 (-), 29.7 (+). IR (KBr) [cm-1]:  $\nu$  = 3185, 2836, 1617, 1676, 1660, 1260, 710. HRMS (EI-MS) calcd. For  $C_{40}H_{40}N_3O_6$  [M+H]<sup>+</sup>: 658.2917; found [M+H]<sup>+</sup>: 658.2920.

**(E)-N-(3-(3-(4-(2-(6,7-bis(2-(2-(2-methoxyethoxy)ethoxy)ethoxy)ethoxy)-3,4-dihydroisoquinolin-2(1H)-yl)ethoxy)phenyl)acryloyl)phenyl)quinoline-2-carboxamide (16c)**

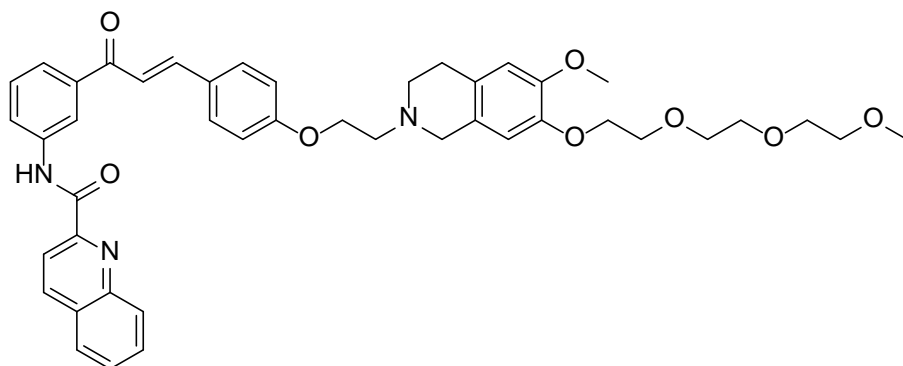

Pale yellow solid. (0.025 g, yield 58%,  $R_f$  DCM:MeOH 20:1 0.35).  $^1\text{H NMR}$  (400 MHz,  $\text{CDCl}_3$ ):  $\delta$  8.43 (m, 3H, quinol), 8.27 (m, 1H, ArH), 7.94 (d,  $^3J=8.2$  Hz, 1H, quinol), 7.84 (dd,  $^3J=8.2$ ,  $^3J=6.9$ , 3H, ArH), 7.68 (t,  $^3J=7.2$  Hz, 2H, quinol), 7.50 (d,  $^3J=15.6$  Hz, 1H, COCH), 6.98 (s, 1H, CH THIQ), 6.66 (s, 1H, CH THIQ), 4.52 (s, 2H,  $\text{CH}_2$  THIQ), 4.17 (m, 2H,  $\text{CH}_2$  THIQ), 3.94 (m, 2H,  $\text{CH}_2$  THIQ), 3.87 (s, 3H,  $\text{OCH}_3$ ), 3.73 (dd,  $^3J=5.8$ ,  $^3J=3.1$  Hz, 4H,  $2\text{CH}_2$  PEG), 3.70 (m, 4H,  $2\text{CH}_2$  PEG), 3.55 (dd,  $^3J=5.7$ ,  $^3J=3.5$  Hz, 4H,  $2\text{CH}_2$  PEG), 3.36 (m, 2H,  $\text{CH}_2\text{OCH}_3$ ), 3.14 (m, 2H,  $\text{CH}_2\text{CH}_2\text{N}$ ).  $^{13}\text{C NMR}$  (100 MHz,  $\text{CDCl}_3$ ):  $\delta$  190.1 ( $\text{C}_{\text{quat}}$ ), 162.4 ( $\text{C}_{\text{quat}}$ ), 161.0 ( $\text{C}_{\text{quat}}$ ), 149.3 ( $\text{C}_{\text{quat}}$ ), 148.3 ( $\text{C}_{\text{quat}}$ ), 146.8 ( $\text{C}_{\text{quat}}$ ), 145.0 (+), 139.3 ( $\text{C}_{\text{quat}}$ ), 138.3 ( $\text{C}_{\text{quat}}$ ), 138.0 ( $\text{C}_{\text{quat}}$ ), 132.0 (+), 130.4 (+), 129.6 (+), 128.3 ( $\text{C}_{\text{quat}}$ ), 127.8 (+), 126.8 (+), 124.2 ( $\text{C}_{\text{quat}}$ ), 119.4 (+), 118.7 (+), 115.0 (+), 112.5 (+), 111.9 (+), 71.9 (-), 70.9 (-), 70.3 (-), 69.6 (+), 68.7 (-), 59.0 (+), 56.6 (-), 56.0 (-), 28.5 (-). IR (KBr) [ $\text{cm}^{-1}$ ]:  $\nu$  = 3156, 2891, 1672, 1661, 1646, 1040, 682. HRMS (EI-MS) calcd. For  $\text{C}_{44}\text{H}_{48}\text{N}_3\text{O}_8$   $[\text{M}+\text{H}]^+$ : 746.3441; found  $[\text{M}+\text{H}]^+$ : 746.3444.

**(E)-N-(5-(3-(4-(2-(6,7-dimethoxy-3,4-dihydroisoquinolin-2(1H)-yl)ethoxy)phenyl)acryloyl)-2-methylphenyl)quinoline-2-carboxamide (16d)**

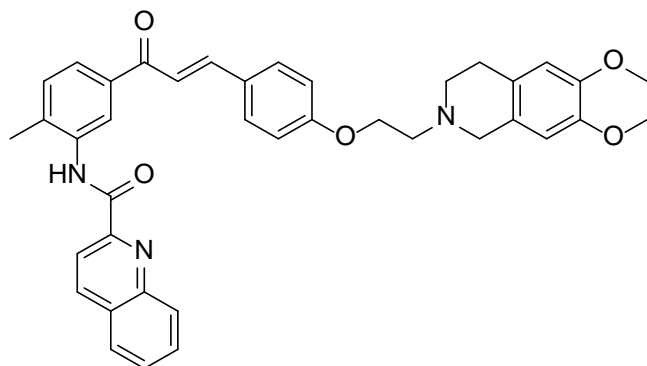

Brown yellow solid. (0.042 g, yield 68%,  $R_f$  DCM:MeOH 20:1 0.47).  $^1\text{H NMR}$  (400 MHz,  $\text{CDCl}_3$ ):  $\delta$  8.99 (s, 2H, quinol), 8.41 (s, 2H, ArH), 8.18 (d,  $^3J=8.4$  Hz, 1H, ArH), 7.93 (d,  $^3J=13.6$  Hz, 1H, quinol), 7.83 (m, 1H, ArH), 7.65 (d,  $^3J=8.7$  Hz, 3H, quinol), 7.50 (d,  $^3J=15.6$  Hz, 1H, COCH), 7.38 (d,  $^3J=8.0$  Hz, 1H, ArH), 6.96 (d,  $^3J=8.7$  Hz, 2H, ArH), 6.61 (s, 1H, CH THIQ), 6.53 (s, 1H, CH THIQ), 4.31 (s, 2H,  $\text{CH}_2$  THIQ), 3.85 (s, 3H,  $\text{OCH}_3$ ), 3.84 (s, 3H,  $\text{OCH}_3$ ), 3.66 (m, 2H,  $\text{CH}_2$  THIQ), 3.16 (m, 2H,  $\text{CH}_2$  THIQ), 2.58 (s, 3H,  $\text{CH}_3$ ).  $^{13}\text{C NMR}$  (100 MHz,  $\text{CDCl}_3$ ):  $\delta$  189.9 ( $\text{C}_{\text{quat}}$ ), 162.3 ( $\text{C}_{\text{quat}}$ ), 159.8 ( $\text{C}_{\text{quat}}$ ), 154.6 ( $\text{C}_{\text{quat}}$ ), 149.6 ( $\text{C}_{\text{quat}}$ ), 146.3 ( $\text{C}_{\text{quat}}$ ), 144.4 ( $\text{C}_{\text{quat}}$ ), 142.4 ( $\text{C}_{\text{quat}}$ ), 138.0 ( $\text{C}_{\text{quat}}$ ), 137.4 ( $\text{C}_{\text{quat}}$ ), 136.1 (+), 133.3 (+), 130.9 (+), 130.4 (+), 129.8 (+), 129.5 (+), 128.3 ( $\text{C}_{\text{quat}}$ ), 127.8 ( $\text{C}_{\text{quat}}$ ), 126.4 ( $\text{C}_{\text{quat}}$ ), 124.7 (+), 121.4 (+), 118.7 (+), 115.0 (+), 111.3 (+), 109.4 (+), 68.0 (-), 58.1 (+), 55.9 (-), 51.0 (-), 27.2 (-), 18.0 (+). IR (KBr) [ $\text{cm}^{-1}$ ]:  $\nu$  = 3185, 2824, 1583, 1653, 1660, 1047, 698. HRMS (EI-MS) calcd. For  $\text{C}_{39}\text{H}_{38}\text{N}_3\text{O}_5$   $[\text{M}+\text{H}]^+$ : 628.2811; found  $[\text{M}+\text{H}]^+$ : 628.2814.

**(E)-N-(5-(3-(4-(2-(6,7-bis(2-methoxyethoxy)-3,4-dihydroisoquinolin-2(1H)-yl)ethoxy)phenyl)acryloyl)-2-methylphenyl)quinoline-2-carboxamide (16e)**

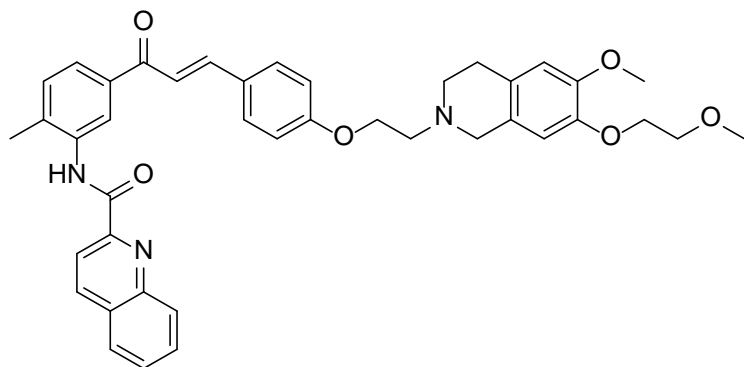

Yellow solid. (0.036 g, yield 57%,  $R_f$  DCM:MeOH 20:1 0.45).  $^1\text{H NMR}$  (400 MHz,  $\text{CDCl}_3$ ):  $\delta$  8.43 (m, 2H, ArH quinol), 8.21 (m, 2H, ArH), 7.93 (d,  $^3J=8.1$  Hz, 2H, ArH quinol), 7.81 (t,  $^3J=7.2$  Hz, 4H), 7.71 (m, 2H, ArH quinol), 7.57 (m, 1H, ArH), 7.36 (d,  $^3J=8.3$  Hz, 1H, COCH), 6.57 (s, 1H, CH THIQ), 6.56 (s, 1H, CH THIQ), 4.13 (m, 4H,  $\text{OCH}_2\text{CH}_2$ ), 3.80 (s, 3H,  $\text{OCH}_3$ ), 3.76 (t,  $^3J=7.0$  Hz, 2H,  $\text{CH}_2$  PEG), 3.74 (d,  $^3J=4.9$  Hz, 2H,  $\text{CH}_2$  PEG), 3.61 (m, 2H,  $\text{CH}_2$  THIQ), 3.52 (m, 2H,  $\text{CH}_2$  THIQ), 3.41 (m, 2H,  $\text{CH}_2$  THIQ), 3.38 (s, 3H,  $\text{CH}_2\text{OCH}_3$ ), 2.57 (s, 3H,  $\text{CH}_3$ ).  $^{13}\text{C NMR}$  (101 MHz,  $\text{CDCl}_3$ ):  $\delta$  191.5 ( $\text{C}_{\text{quat}}$ ), 163.5 ( $\text{C}_{\text{quat}}$ ), 149.9 ( $\text{C}_{\text{quat}}$ ), 148.3 ( $\text{C}_{\text{quat}}$ ), 146.8 ( $\text{C}_{\text{quat}}$ ), 144.6 (+), 143.5 (+), 141.5 ( $\text{C}_{\text{quat}}$ ), 138.0 ( $\text{C}_{\text{quat}}$ ), 130.9 (+) 130.4 (+), 129.7 (+), 128.3 ( $\text{C}_{\text{quat}}$ ), 127.9 (+), 126.9 ( $\text{C}_{\text{quat}}$ ), 126.3 ( $\text{C}_{\text{quat}}$ ), 125.3 (+), 115.0 (+), 112.4 (+), 111.8 (+), 71.0 (-), 70.6 (-), 68.6 (-), 59.1 (+), 58.9 (-), 57.4 (+), 55.9 (-), 51.3 (-), 29.7 (-), 28.4 (+). IR (KBr) [ $\text{cm}^{-1}$ ]:  $\nu$  = 3158, 2823, 1631, 1596, 1632, 976, 683. HRMS (EI-MS) calcd. For  $\text{C}_{41}\text{H}_{42}\text{N}_3\text{O}_6$  [ $\text{M}+\text{H}$ ] $^+$ : 672.3073; found [ $\text{M}+\text{H}$ ] $^+$ : 672.3072.

**(E)-N-(5-(3-(4-(2-(6,7-bis(2-(2-(2-methoxyethoxy)ethoxy)ethoxy)ethoxy)phenyl)acryloyl)-2-methylphenyl)quinoline-2-carboxamide (16f)**

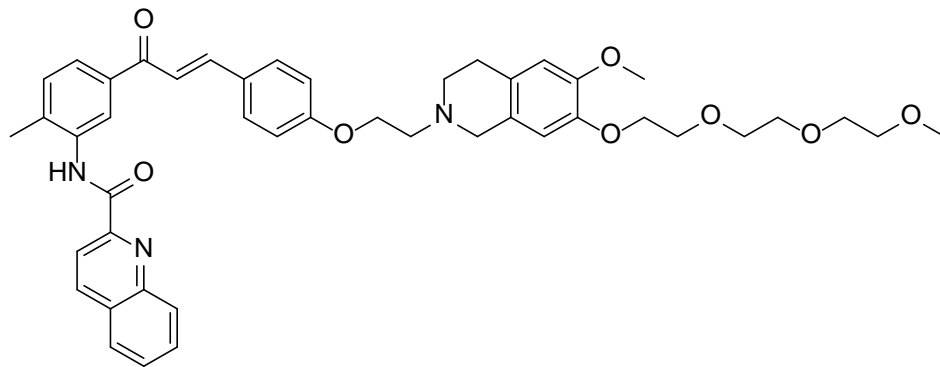

Yellow solid. (0.023 g, yield 61%,  $R_f$  DCM:MeOH 20:1 0.44).  $^1\text{H NMR}$  (400 MHz,  $\text{CDCl}_3$ ):  $\delta$  8.41 (m, 2H, ArH quinol), 8.24 (m, 1H, ArH), 8.05 (s, 1H, ArH), 7.93 (d,  $^3J=8.2$  Hz, 2H, ArH quinol), 7.82 (t,  $^3J=9.8$  Hz, 1H, ArH), 7.66 (m, 2H, ArH quinol), 7.51 (d,  $^3J=15.6$  Hz, 1H, COCH), 7.35 (d,  $^3J=8.1$  Hz, 2H, ArH), 6.92 (d,  $^3J=6.0$  Hz, 1H, ArH), 6.57 (s, 1H, CH THIQ), 6.55 (s, 1H, CH THIQ), 4.19 (m, 4H,  $2\text{CH}_2$  PEG), 3.90

(m, 2H, CH<sub>2</sub> THIQ), 3.87 (m, 2H, CH<sub>2</sub> PEG), 3.81 (s, 3H, OCH<sub>3</sub>), 3.68 (m, 2H, CH<sub>2</sub> PEG), 3.55 (d, <sup>3</sup>J=5.0 Hz, 2H, CH<sub>2</sub> PEG), 3.37 (m, 4H, 2CH<sub>2</sub> PEG), 3.09 (t, <sup>3</sup>J=5.9 Hz, 2H, CH<sub>2</sub> THIQ), 2.69 (t, <sup>3</sup>J=5.8 Hz, 2H, CH<sub>2</sub> THIQ). **<sup>13</sup>C NMR (100 MHz, CDCl<sub>3</sub>):** δ 170.7 (C<sub>quat</sub>), 162.3 (C<sub>quat</sub>), 154.6 (C<sub>quat</sub>), 153.6 (C<sub>quat</sub>), 148.0 (C<sub>quat</sub>), 146.4 (C<sub>quat</sub>), 139.0 (C<sub>quat</sub>), 138.0 (C<sub>quat</sub>), 128.2 (C<sub>quat</sub>), 127.9 (C<sub>quat</sub>), 127.3 (C<sub>quat</sub>), 118.7 (+), 115.0 (+), 112.6 (+), 111.9 (+), 71.9 (-), 70.7 (-), 70.6 (-), 70.5 (-), 69.6 (+), 68.7 (-), 59.0 (+), 56.0 (-), 43.9 (-), 28.7 (-), 18.0 (+). **IR (KBr) [cm<sup>-1</sup>]:** ν = 3217, 2913, 1702, 1692, 1589, 984, 714. **HRMS (EI-MS)** calcd. For C<sub>45</sub>H<sub>50</sub>N<sub>3</sub>O<sub>8</sub> [M+H]<sup>+</sup>: 760.3597; found [M+H]<sup>+</sup>: 760.3606.

**N-(3-(2-(6,7-dimethoxy-3,4-dihydroisoquinolin-2(1H)-yl)acetyl)phenyl)quinoline-2-carboxamide (17a)**

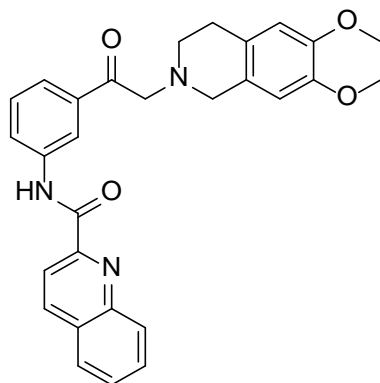

Light yellow solid. (0.025 g, yield 75%, R<sub>f</sub> PE:EA 2 : 1 0.36). **<sup>1</sup>H-NMR (400 MHz, CDCl<sub>3</sub>):** δ 8.38 (m, 1H, quinol), 8.30 (dd, <sup>3</sup>J=7.6, <sup>3</sup>J=8.4 Hz, 2H, quinol), 8.12 (dd, <sup>3</sup>J=8.3, <sup>3</sup>J=7.9 Hz, 2H, ArH), 7.87 (d, <sup>3</sup>J=8.1 Hz, 1H, quinol), 7.78 (t, <sup>3</sup>J=7.4 Hz, 1H, quinol), 7.69 (m, 2H, ArH), 7.47 (t, <sup>3</sup>J=6.2 Hz, 1H, quinol), 6.62 (s, 1H, CH THIQ), 6.52 (s, 1H, CH THIQ), 4.90 (s, 2H, COCH<sub>2</sub>), 4.56 (m, 2H, CH<sub>2</sub> THIQ), 3.83 (s, 3H, OCH<sub>3</sub>), 3.80 (s, 3H, OCH<sub>3</sub>), 3.13 (m, 4H, 2CH<sub>2</sub> THIQ). **<sup>13</sup>C-NMR (100 MHz, CDCl<sub>3</sub>):** δ 194.5 (C<sub>quat</sub>), 169.7 (C<sub>quat</sub>), 149.2 (C<sub>quat</sub>), 148.8 (C<sub>quat</sub>), 148.5 (C<sub>quat</sub>), 146.6 (C<sub>quat</sub>), 138.6 (C<sub>quat</sub>), 138.0 (C<sub>quat</sub>), 136.2 (C<sub>quat</sub>), 134.4 (C<sub>quat</sub>), 130.5 (+), 129.9 (+), 129.7 (+), 128.4 (+), 127.8 (+), 125.8 (+), 123.7 (+), 122.3 (+), 118.5 (+), 111.2 (+), 55.9 (-), 52.8 (+), 50.0 (-), 45.7 (-), 24.1 (-). **IR (KBr) [cm<sup>-1</sup>]:** ν = 2880, 1689, 1635, 1425, 1150, 753, 726. **HRMS (EI-MS)** calcd. For C<sub>29</sub>H<sub>28</sub>N<sub>3</sub>O<sub>4</sub> [M+H]<sup>+</sup>: 482.2080; found [M+H]<sup>+</sup>: 482.2048

**N-(3-(2-(6-methoxy-7-(2-methoxyethoxy)-3,4-dihydroisoquinolin-2(1H)-yl)acetyl)phenyl)quinoline-2-carboxamide (17b)**

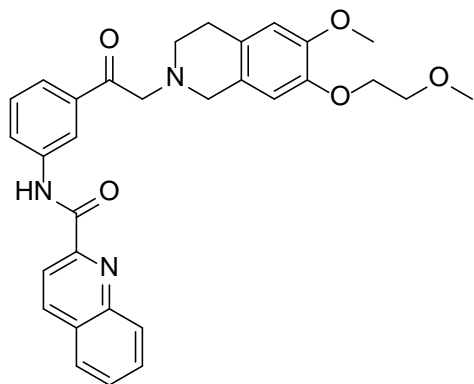

Light yellow solid. (0.030 g, yield 90%,  $R_f$  PE:EA 2:1 0.31).  **$^1\text{H-NMR}$  (400 MHz,  $\text{CDCl}_3$ ):**  $\delta$  8.38 (m, 2H, quinol), 8.33 (s, 2H, quinol), 8.21 (d,  $^3J=8.5$  Hz, 2H, ArH), 7.93 (d,  $^3J=8.3$  Hz, 2H, quinol), 7.83 (dd,  $^3J=8.4$ ,  $^3J=7.0$  Hz, 2H, ArH), 7.67 (t,  $^3J=7.9$  Hz, 2H, quinol), 6.80 (s, 1H, CH THIQ), 6.62 (s, 1H, CH THIQ), 5.28 (s, 2H,  $\text{COCH}_2$ ), 4.19 (s, 2H,  $\text{CH}_2$  THIQ), 3.87 (d,  $^3J=5.4$  Hz, 2H,  $\text{CH}_2$  PEG), 3.83 (s, 3H,  $\text{OCH}_3$ ), 3.80 (d,  $^3J=4.7$  Hz, 2H,  $\text{CH}_2$  PEG), 3.47 (s, 3H,  $\text{CH}_2\text{OCH}_3$ ), 3.14 (m, 2H,  $\text{CH}_2$  THIQ), 2.86 (t,  $^3J=5.7$  Hz, 2H,  $\text{CH}_2$  THIQ).  **$^{13}\text{C-NMR}$  (100 MHz,  $\text{CDCl}_3$ ):**  $\delta$  187.0 ( $\text{C}_{\text{quat}}$ ), 163.4 ( $\text{C}_{\text{quat}}$ ), 146.3 ( $\text{C}_{\text{quat}}$ ), 138.6 ( $\text{C}_{\text{quat}}$ ), 138.0 ( $\text{C}_{\text{quat}}$ ), 134.3 ( $\text{C}_{\text{quat}}$ ), 130.5 ( $\text{C}_{\text{quat}}$ ), 129.8 ( $\text{C}_{\text{quat}}$ ), 129.7 ( $\text{C}_{\text{quat}}$ ), 129.5 (+), 128.4 (+), 127.8 (+), 125.8 (+), 125.6 (+), 125.6 (+), 122.8 (+), 120.6 (+), 118.7 (+), 111.8 (+), 111.6 (+), 71.0 (-), 68.7 (-), 59.6 (-), 55.8 (+), 49.5 (+), 49.3 (-), 45.8 (-), 29.7 (-). **IR (KBr) [ $\text{cm}^{-1}$ ]:**  $\nu$  = 2903, 1673, 1645, 1402, 1189, 764, 731. **HRMS (EI-MS)** calcd. For  $\text{C}_{31}\text{H}_{32}\text{N}_3\text{O}_5$   $[\text{M}+\text{H}]^+$ : 526.2342; found  $[\text{M}+\text{H}]^+$ : 526.2315

**N-(3-(2-(6,7-bis(2-(2-(2-methoxyethoxy)ethoxy)ethoxy)ethoxy)-3,4-dihydroisoquinolin-2(1H)-yl)acetyl)phenyl)quinoline-2-carboxamide (17c)**

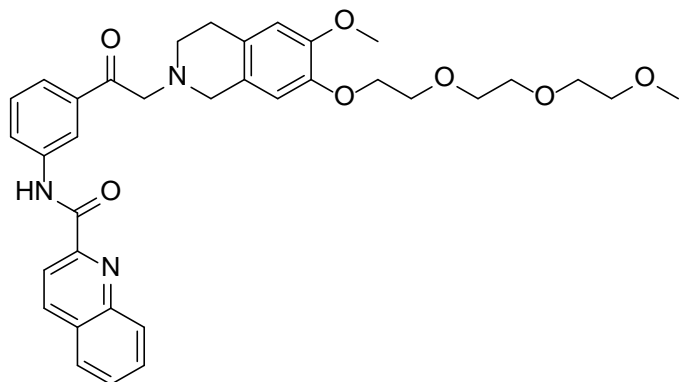

Light yellow solid. (0.026 g, yield 85%,  $R_f$  PE:EA 2:1 0.20).  **$^1\text{H-NMR}$  (400 MHz,  $\text{CDCl}_3$ ):**  $\delta$  8.38 (m, 2H, quinol), 8.33 (s, 2H, quinol), 8.20 (d,  $^3J=8.5$  Hz, 1H, ArH), 7.91 (s, 1H, ArH quinol), 7.84 (m, 1H, quinol), 7.67 (t,  $^3J=7.2$  Hz, 1H, ArH), 7.53 (m, 2H, ArH), 6.81 (s, 1H, CH THIQ), 6.62 (s, 1H, CH THIQ), 5.27 (s, 2H,  $\text{COCH}_2$ ), 4.21 (s, 2H,  $\text{CH}_2$  THIQ), 3.91 (dd,  $^3J=5.7, 4.3$  Hz, 2H,  $\text{CH}_2$  THIQ), 3.82 (s, 3H,  $\text{OCH}_3$ ), 3.81 (s, 4H,  $\text{CH}_2$  PEG), 3.78 (m, 4H,  $\text{CH}_2$  PEG), 3.59 (m, 4H,  $\text{CH}_2$  PEG), 3.39 (s, 3H,  $\text{CH}_2\text{OCH}_3$ ), 3.32 (d,  $^3J=3.6$  Hz, 2H,  $\text{CH}_2$  THIQ).  **$^{13}\text{C-NMR}$  (100 MHz,  $\text{CDCl}_3$ ):**  $\delta$  195.0 ( $\text{C}_{\text{quat}}$ ), 162.3 ( $\text{C}_{\text{quat}}$ ), 149.0 ( $\text{C}_{\text{quat}}$ ), 148.6 ( $\text{C}_{\text{quat}}$ ), 146.3 ( $\text{C}_{\text{quat}}$ ), 138.3 ( $\text{C}_{\text{quat}}$ ), 137.8 ( $\text{C}_{\text{quat}}$ ), 134.1 ( $\text{C}_{\text{quat}}$ ), 130.5 ( $\text{C}_{\text{quat}}$ ), 129.8 ( $\text{C}_{\text{quat}}$ ), 129.7 ( $\text{C}_{\text{quat}}$ ), 129.6 (+), 128.3 (+), 127.6 (+), 125.8 (+), 125.6 (+), 122.7 (+), 120.6 (+), 118.6 (+), 111.7 (+), 111.6 (+), 71.9 (-), 70.6 (-), 70.5 (-), 69.4 (-), 68.7 (-), 68.5 (-), 58.8 (+), 55.8 (+), 49.6 (-), 49.2 (-), 28.6 (-). **IR (KBr) [ $\text{cm}^{-1}$ ]:**  $\nu = 2892, 1705, 1687, 1412, 1126, 749, 731$ . **HRMS (EI-MS)** calcd. For  $\text{C}_{35}\text{H}_{40}\text{N}_3\text{O}_7$   $[\text{M}+\text{H}]^+$ : 614.2866; found  $[\text{M}+\text{H}]^+$ : 614.2851

**N-(5-(2-(6,7-dimethoxy-3,4-dihydroisoquinolin-2(1H)-yl)acetyl)-2-methylphenyl)quinoline-2-carboxamide (17d)**

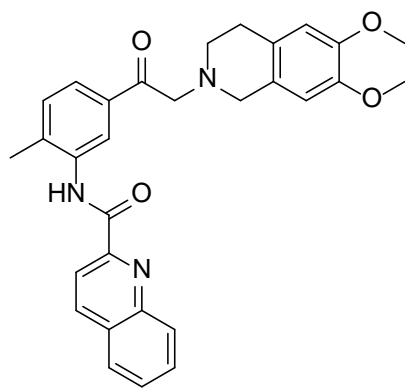

Light yellow solid. (0.024 g, yield 82%,  $R_f$  PE:EA 2:1 0.40).  **$^1\text{H-NMR}$  (400 MHz,  $\text{CDCl}_3$ ):**  $\delta$  8.61 (m, 2H, quinol), 8.32 (t,  $^3J=7.5$  Hz, 2H, quinol), 8.16 (m, 1H, ArH), 7.87 (s, 1H, ArH), 7.75 (t,  $^3J=8.4$  Hz, 1H, ArH), 7.61 (t,  $^3J=7.0$  Hz, 1H, quinol), 7.46 (d,  $^3J=8.3$  Hz, 1H, quinol), 6.51 (s, 1H, CH THIQ), 6.44 (s, 1H, CH THIQ), 5.23 (s, 2H,  $\text{COCH}_2$ ), 3.91 (s, 2H,  $\text{CH}_2$  THIQ), 3.78 (s, 3H,  $\text{OCH}_3$ ), 3.77 (s, 3H,  $\text{OCH}_3$ ), 3.09 (t,  $^3J=5.5$  Hz, 2H,  $\text{CH}_2$  THIQ), 2.68 (t,  $^3J=5.7$  Hz, 2H,  $\text{CH}_2$  THIQ).  **$^{13}\text{C-NMR}$  (100 MHz,  $\text{CDCl}_3$ ):**  $\delta$  200.2 ( $\text{C}_{\text{quat}}$ ), 162.2 ( $\text{C}_{\text{quat}}$ ), 149.2 ( $\text{C}_{\text{quat}}$ ), 146.2 ( $\text{C}_{\text{quat}}$ ), 138.9 ( $\text{C}_{\text{quat}}$ ), 138.1 ( $\text{C}_{\text{quat}}$ ), 135.6 ( $\text{C}_{\text{quat}}$ ), 132.2 ( $\text{C}_{\text{quat}}$ ), 130.5 ( $\text{C}_{\text{quat}}$ ), 129.7 ( $\text{C}_{\text{quat}}$ ), 128.4 (+), 127.8 (+), 121.4 (+), 119.6 (+), 118.6 (+), 113.6 (+), 111.9 (+), 110.4 (+), 109.1 (+), 56.0 (+), 55.2 (-), 53.4 (-), 47.2 (-), 29.7 (-), 17.3 (+). **IR (KBr) [ $\text{cm}^{-1}$ ]:**  $\nu = 2873, 1712, 1696, 1402, 1127, 762, 734$ . **HRMS (EI-MS)** calcd. For  $\text{C}_{30}\text{H}_{30}\text{N}_3\text{O}_4$   $[\text{M}+\text{H}]^+$ : 496.2236; found  $[\text{M}+\text{H}]^+$ : 496.2224

**N-(3-(2-(6-methoxy-7-(2-methoxyethoxy))-3,4-dihydroisoquinolin-2(1H)-yl)acetyl)phenyl)quinoline-2-carboxamide (17e)**

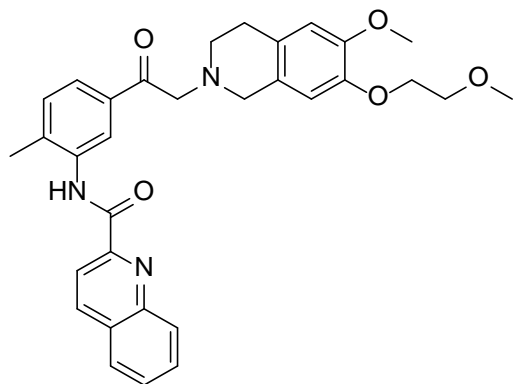

Light yellow solid. (0.032 g, yield 88%,  $R_f$  PE:EA 2:1 0.33).  **$^1\text{H-NMR}$  (400 MHz,  $\text{CDCl}_3$ ):**  $\delta$  8.95 (d,  $^3J=7.7$  Hz, 1H, quinol), 8.40 (s, 1H, quinol), 8.16 (d,  $^3J=8.4$  Hz, 1H, ArH), 7.93 (d,  $^3J=8.2$  Hz, 1H, quinol), 7.84 (m, 1H, quinol), 7.73 (d,  $^3J=9.7$  Hz, 2H, ArH), 7.67 (t,  $^3J=7.5$  Hz, 1H, quinol), 7.35 (d,  $^3J=8.0$  Hz, 1H, quinol), 6.57 (s, 1H, CH THIQ), 6.55 (s, 1H, CH THIQ), 4.94 (s, 2H,  $\text{COCH}_2$ ), 4.12 (s, 2H,  $\text{CH}_2$  THIQ), 3.88 (s, 3H,  $\text{OCH}_3$ ), 3.60 (t,  $^3J=5.6$  Hz, 2H,  $\text{CH}_2$  THIQ), 3.37 (s, 3H,  $\text{CH}_2\text{OCH}_3$ ), 2.76 (t,  $^3J=5.6$  Hz, 2H,  $\text{CH}_2$  THIQ), 2.55 (s, 3H,  $\text{CH}_3$ ).  **$^{13}\text{C-NMR}$  (100 MHz,  $\text{CDCl}_3$ ):**  $\delta$  200.2 ( $\text{C}_{\text{quat}}$ ), 162.19 ( $\text{C}_{\text{quat}}$ ), 149.2 ( $\text{C}_{\text{quat}}$ ), 146.2 ( $\text{C}_{\text{quat}}$ ), 138.9 ( $\text{C}_{\text{quat}}$ ), 138.1 ( $\text{C}_{\text{quat}}$ ), 135.6 ( $\text{C}_{\text{quat}}$ ), 135.5 ( $\text{C}_{\text{quat}}$ ), 132.2 ( $\text{C}_{\text{quat}}$ ), 130.5 ( $\text{C}_{\text{quat}}$ ), 129.8 ( $\text{C}_{\text{quat}}$ ), 129.6 ( $\text{C}_{\text{quat}}$ ), 128.4 (+), 127.8 (+), 127.6 (+), 127.0 (+), 121.4 (+), 118.5 (+), 113.6 (+), 76.7 (-), 70.9 (-), 68.6 (-), 59.1 (+), 56.0 (+), 55.6 (-), 51.2 (-), 30.9 (-), 17.3 (+). **IR (KBr) [ $\text{cm}^{-1}$ ]:**  $\nu$  = 2905, 1652, 1624, 1423, 1151, 739, 725. **HRMS (EI-MS)** calcd. For  $\text{C}_{32}\text{H}_{34}\text{N}_3\text{O}_5$   $[\text{M}+\text{H}]^+$ : 540.2498; found  $[\text{M}+\text{H}]^+$ : 540.2487

**N-(5-(2-(6,7-bis(2-(2-(2-methoxyethoxy)ethoxy)ethoxy)ethoxy)-3,4-dihydroisoquinolin-2(1H)-yl)acetyl)-2-methylphenyl)quinoline-2-carboxamide (17f)**

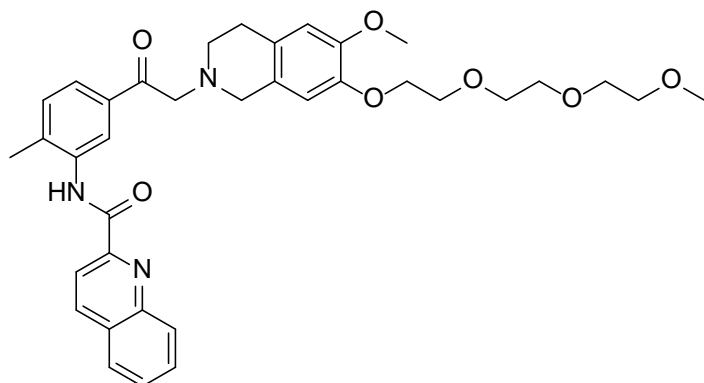

Light yellow solid. (0.031 g, yield 82%,  $R_f$  PE:EA 2:1 0.28).  **$^1\text{H-NMR}$  (400 MHz,  $\text{CDCl}_3$ ):**  $\delta$  8.67 (m, 1H, quinol), 8.38 (d,  $^3J=3.9$  Hz, 1H, quinol), 8.15 (d,  $^3J=8.5$  Hz, 2H, ArH), 7.93 (d,  $^3J=8.1$  Hz, 1H, quinol), 7.74 (m, 1H, ArH), 7.84 (m, 1H, quinol), 7.69 (m, 1H, quinol), 7.52 (s, 1H, quinol), 6.87 (s, 1H, CH THIQ), 6.65 (s, 1H, CH THIQ), 5.29 (s, 2H,  $\text{COCH}_2$ ), 4.20 (s, 2H,  $\text{CH}_2$  THIQ), 4.14 (m, 16H,  $4\text{CH}_2$  PEG), 3.87 (s, 3H,  $\text{OCH}_3$ ), 3.72 (t,  $^3J=5.2$  Hz, 4H,  $2\text{CH}_2$  PEG), 3.65 (d,  $^3J=4.8$  Hz, 4H,  $2\text{CH}_2$  PEG), 3.55 (s, 3H,  $\text{CH}_2\text{OCH}_3$ ), 2.50 (s, 3H,  $\text{CH}_3$ ).  **$^{13}\text{C-NMR}$  (100 MHz,  $\text{CDCl}_3$ ):**  $\delta$  199.7 ( $\text{C}_{\text{quat}}$ ), 161.6 ( $\text{C}_{\text{quat}}$ ), 148.7 ( $\text{C}_{\text{quat}}$ ), 147.6 ( $\text{C}_{\text{quat}}$ ), 146.1 ( $\text{C}_{\text{quat}}$ ), 145.7 ( $\text{C}_{\text{quat}}$ ), 138.4 ( $\text{C}_{\text{quat}}$ ), 137.6 ( $\text{C}_{\text{quat}}$ ), 136.4 ( $\text{C}_{\text{quat}}$ ), 135.1 ( $\text{C}_{\text{quat}}$ ), 131.7 ( $\text{C}_{\text{quat}}$ ), 130.0 ( $\text{C}_{\text{quat}}$ ), 129.2 (+), 127.9 (+), 127.3 (+), 120.9 (+), 118.1 (+), 113.1 (+), 112.8 (+), 112.0 (+), 111.4 (+), 110.2 (+), 71.4 (-), 70.3 (-), 70.1 (-), 70.0 (-), 69.1 (-), 68.4 (-), 68.2 (-), 58.5 (+), 55.5 (+), 46.7 (-), 29.2 (-), 16.8 (+). **IR (KBr) [ $\text{cm}^{-1}$ ]:**  $\nu = 2873, 1675, 1649, 1392, 1129, 741, 716$ . **HRMS (EI-MS)** calcd. For  $\text{C}_{36}\text{H}_{42}\text{N}_3\text{O}_7$   $[\text{M}+\text{H}]^+$ : 628.3022; found  $[\text{M}+\text{H}]^+$ : 628.2994.



## 1.4 NMR spectra

### N-(3-acetylphenyl)quinoline-2-carboxamide (9a)

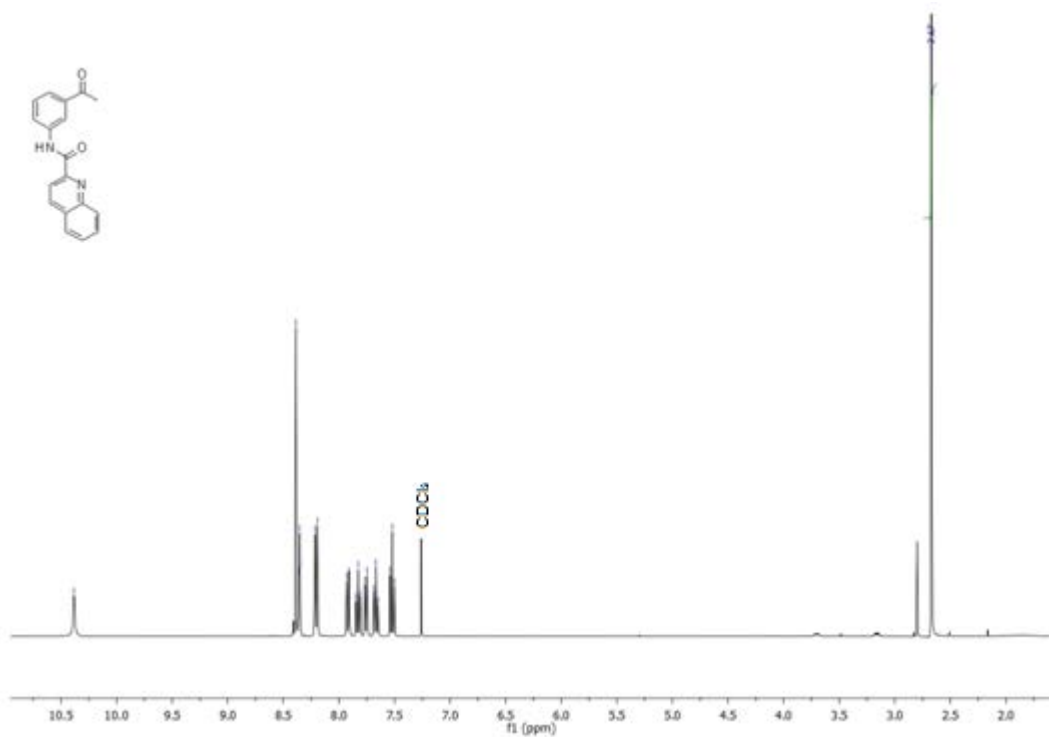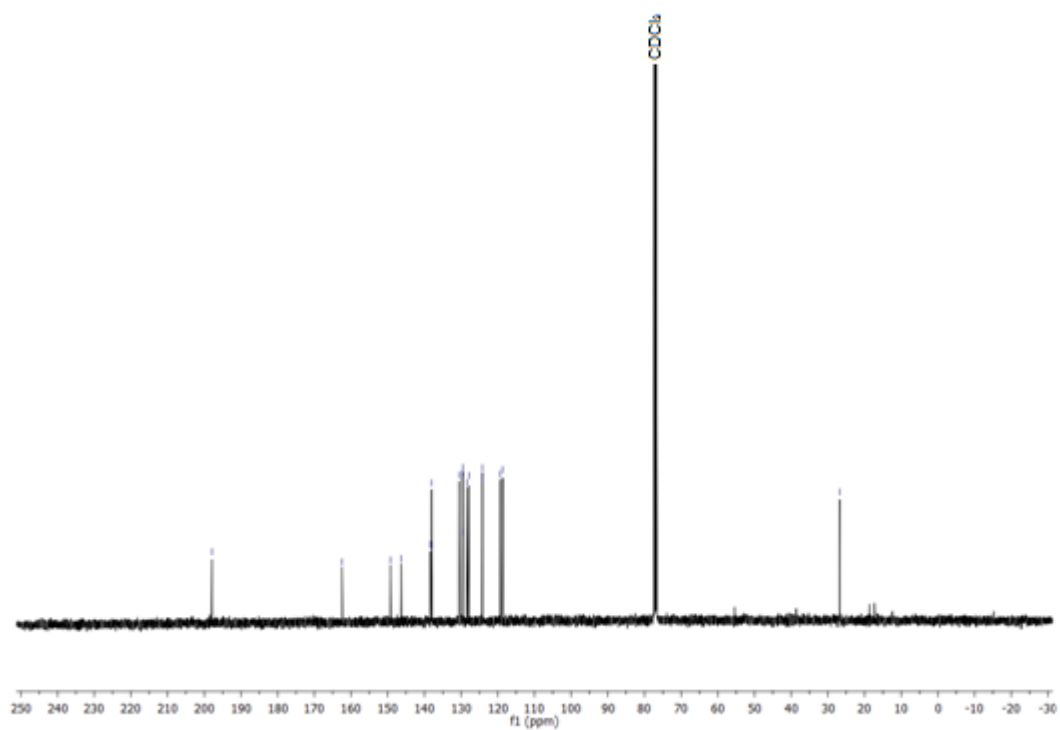



N-(3-(2-bromoacetyl)phenyl)quinoline-2-carboxamide (12a)

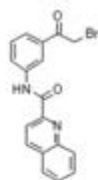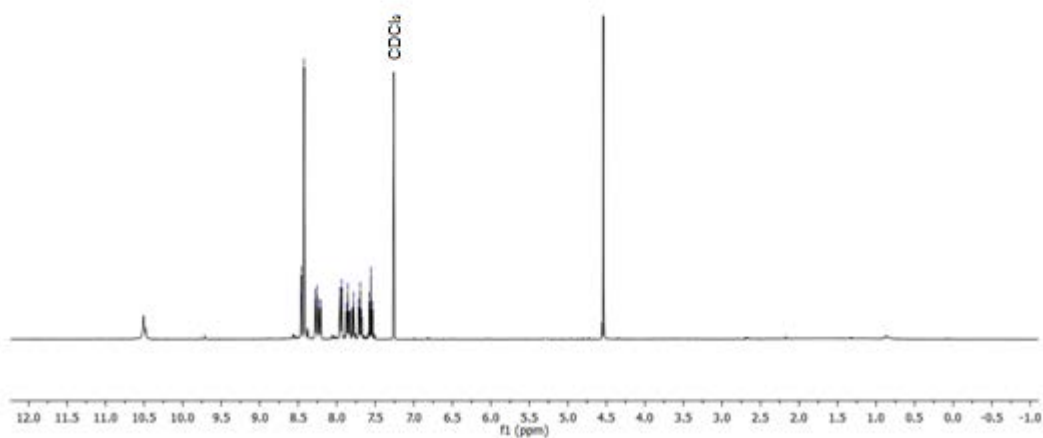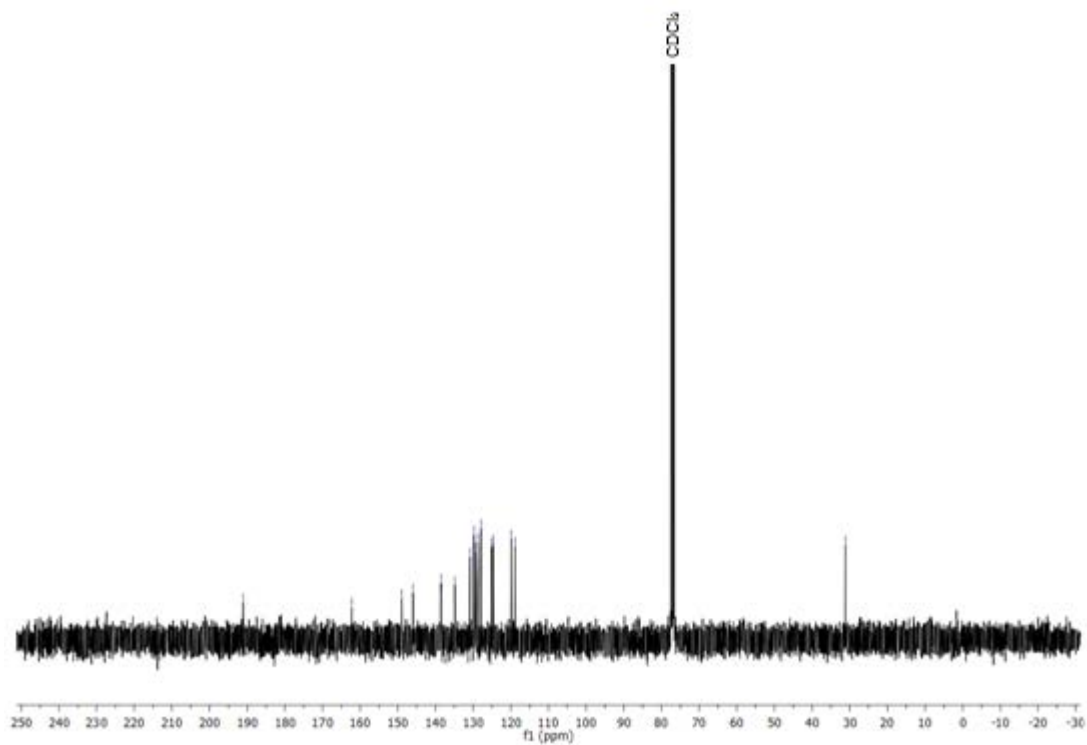

**N-(5-(2-bromoacetyl)-2-methylphenyl)quinoline-2-carboxamide (12b)**

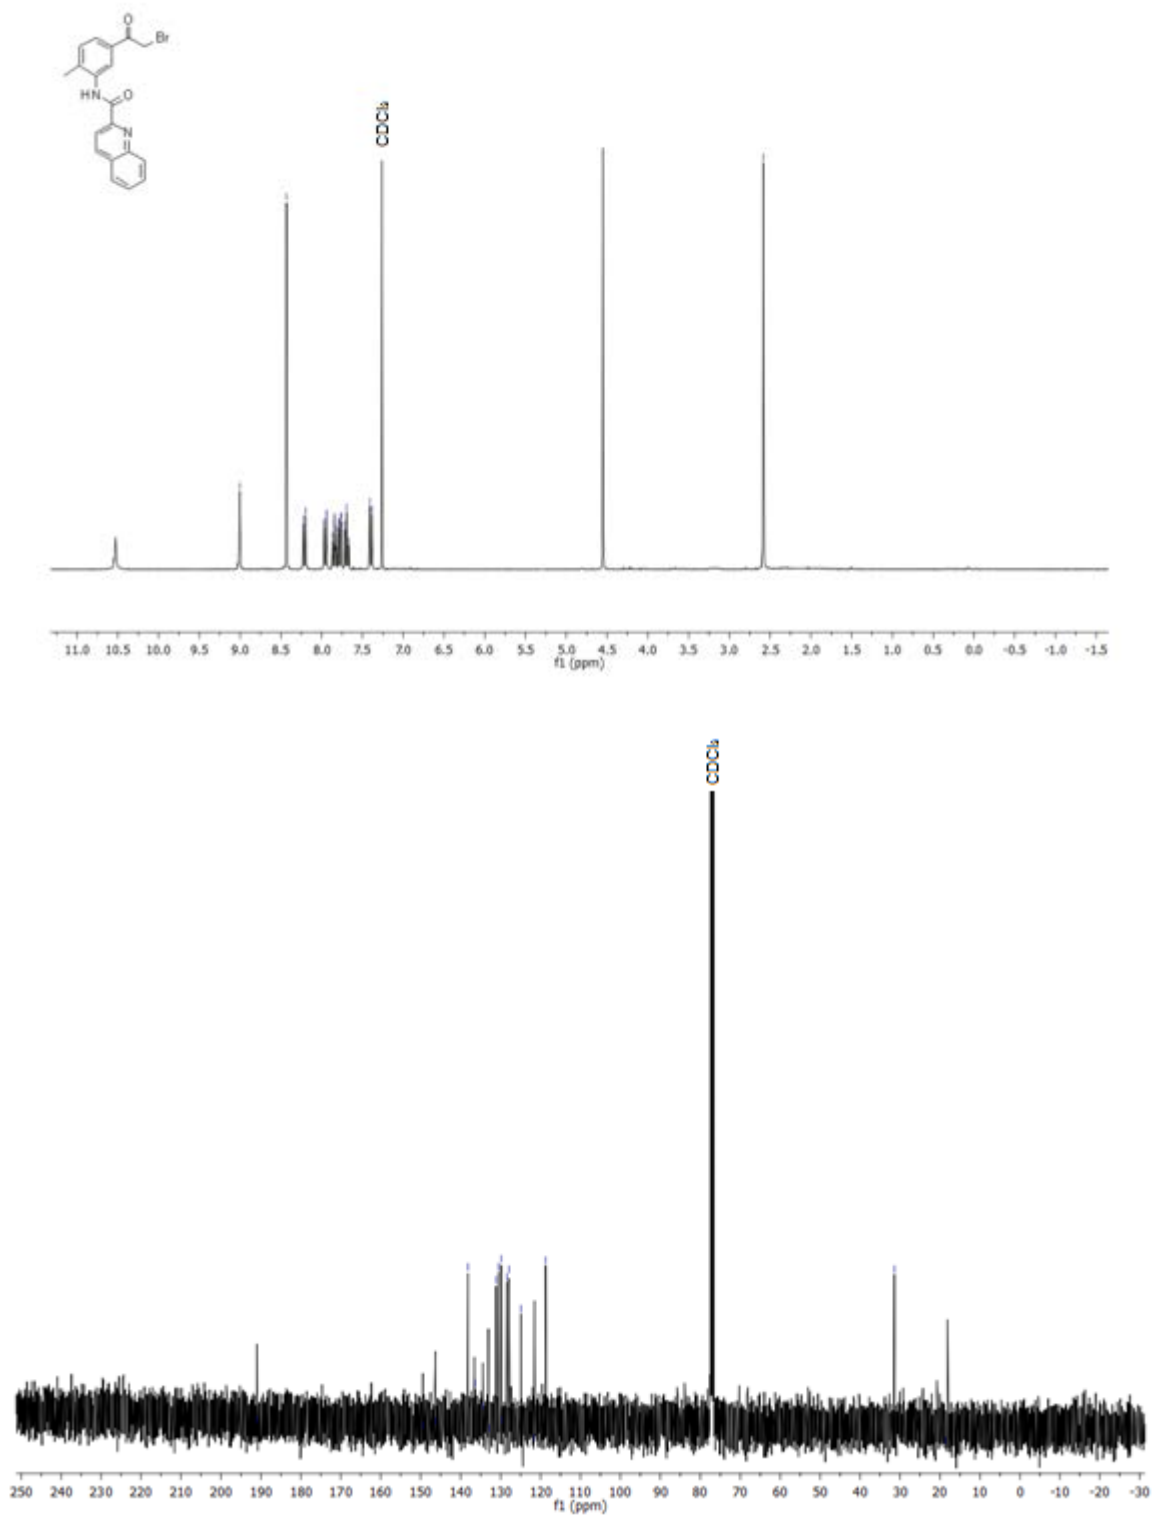

6-methoxy-7-(2-methoxyethoxy)-1,2,3,4-tetrahydroisoquinoline 2,2,2- Trifluoroacetate (15a)

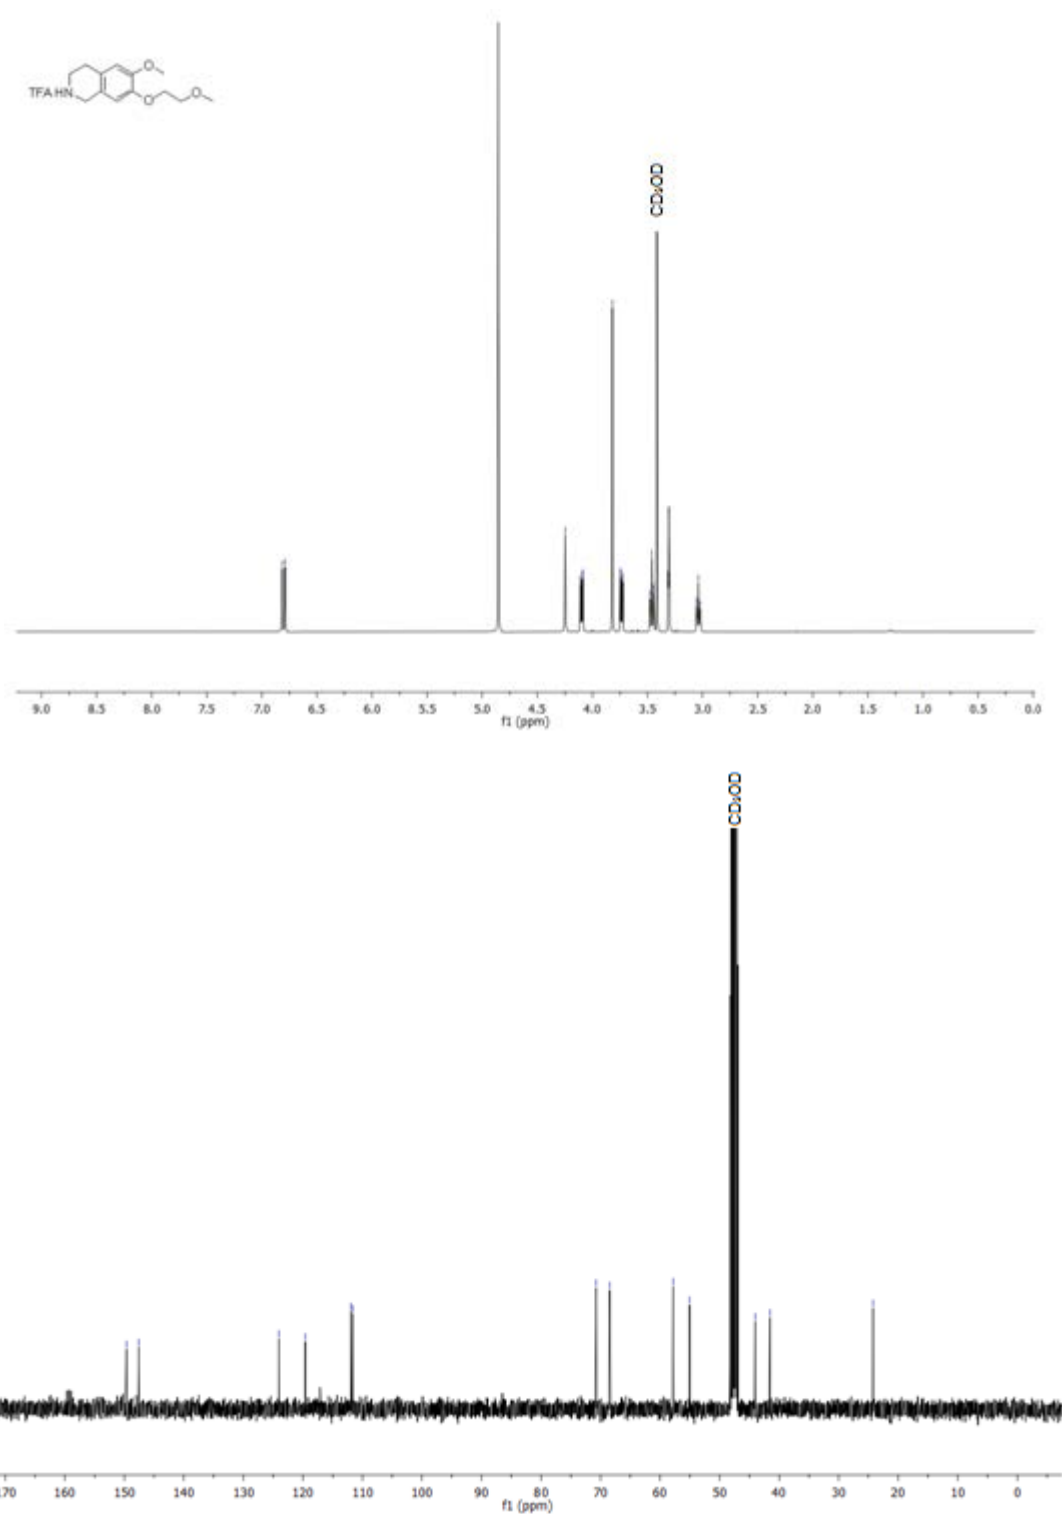

**(E)-2-(4-(3-oxo-3-(3-(quinoline-2-carboxamido)phenyl)prop-1-en-1-yl)phenoxy)ethyl 4-methylbenzenesulfonate (16a)**

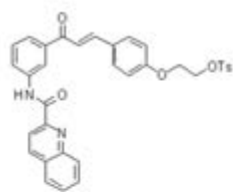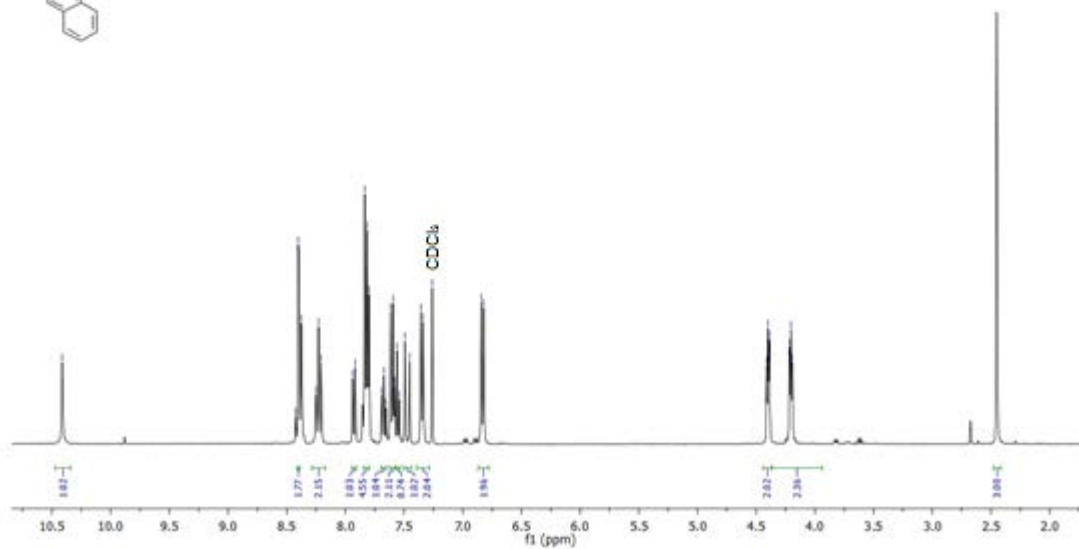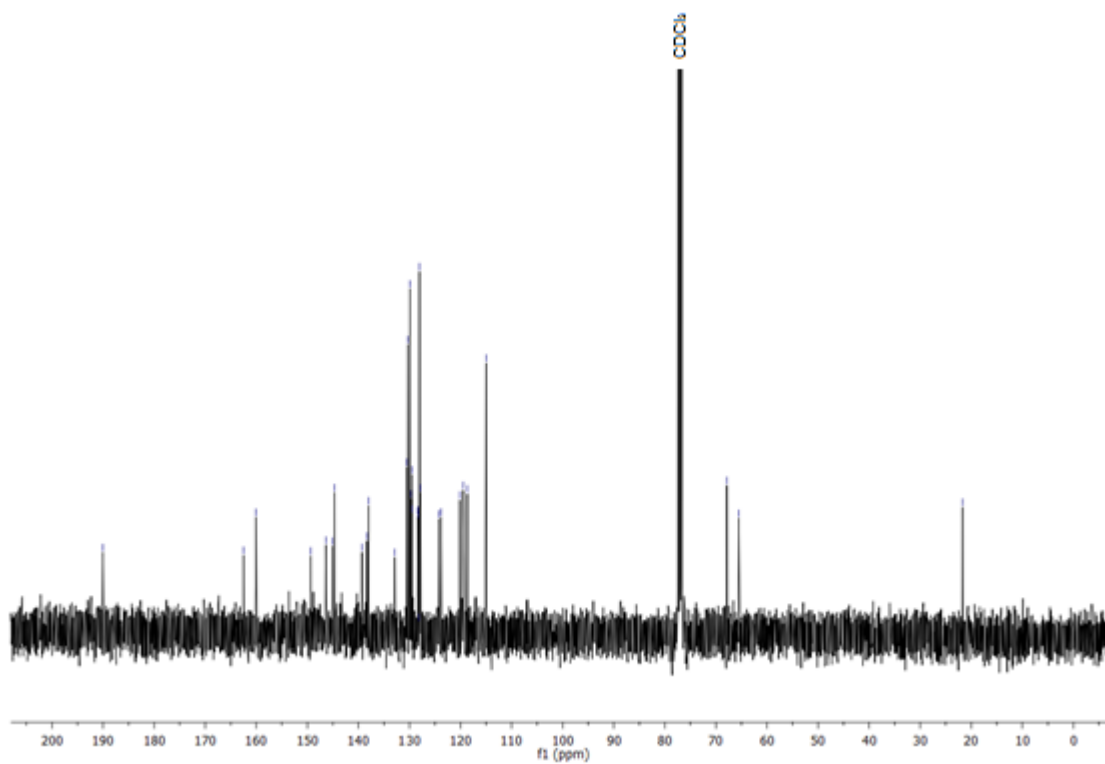

**(E)-2-(4-(3-(4-methyl-3-(quinoline-2-carboxamido)phenyl)-3-oxoprop-1-en-1-yl)phenoxy)ethyl 4-methylbenzenesulfonate (16b)**

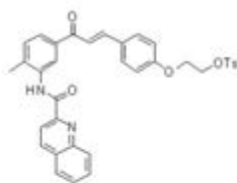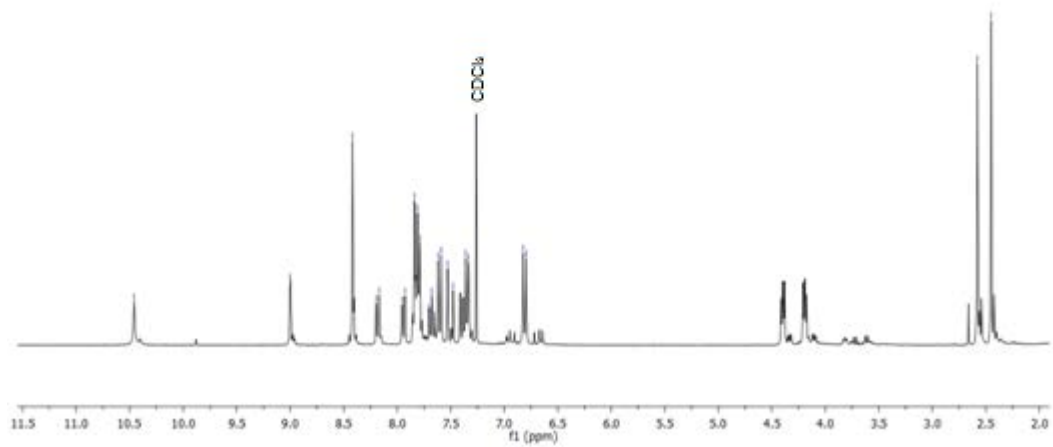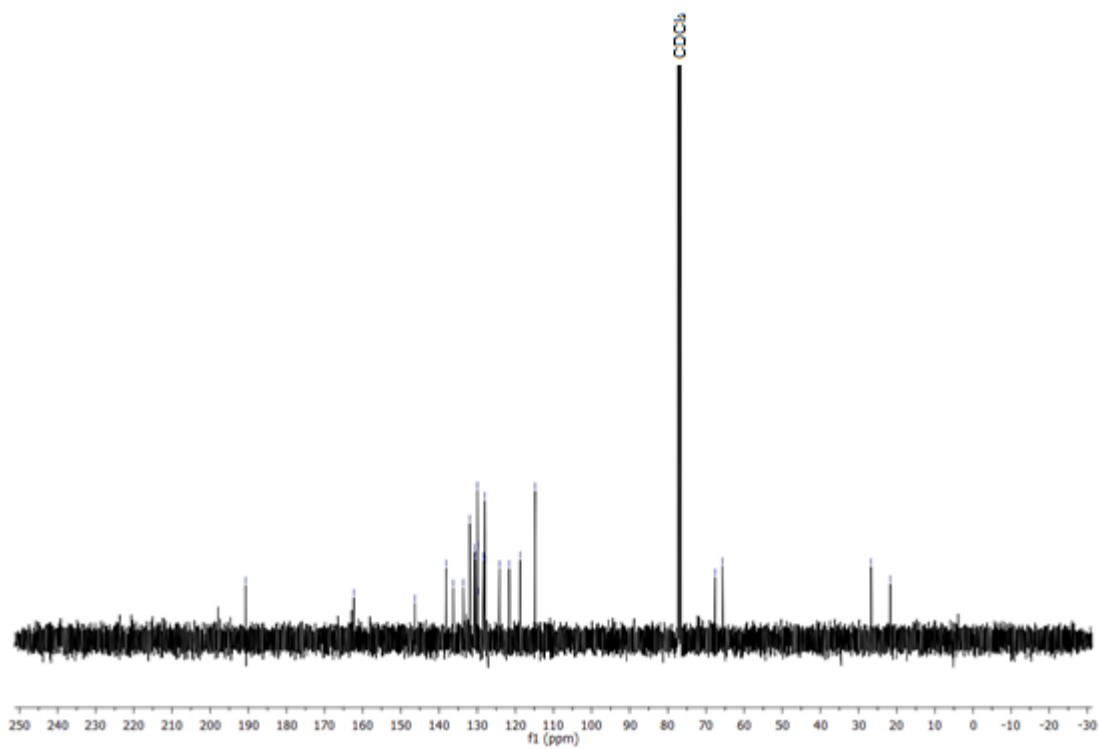

**(E)-N-(3-(3-(4-(2-(6,7-dimethoxy-3,4-dihydroisoquinolin-2(1H)-yl)ethoxy)phenyl)acryloyl)phenyl)quinoline-2-carboxamide (16a)**

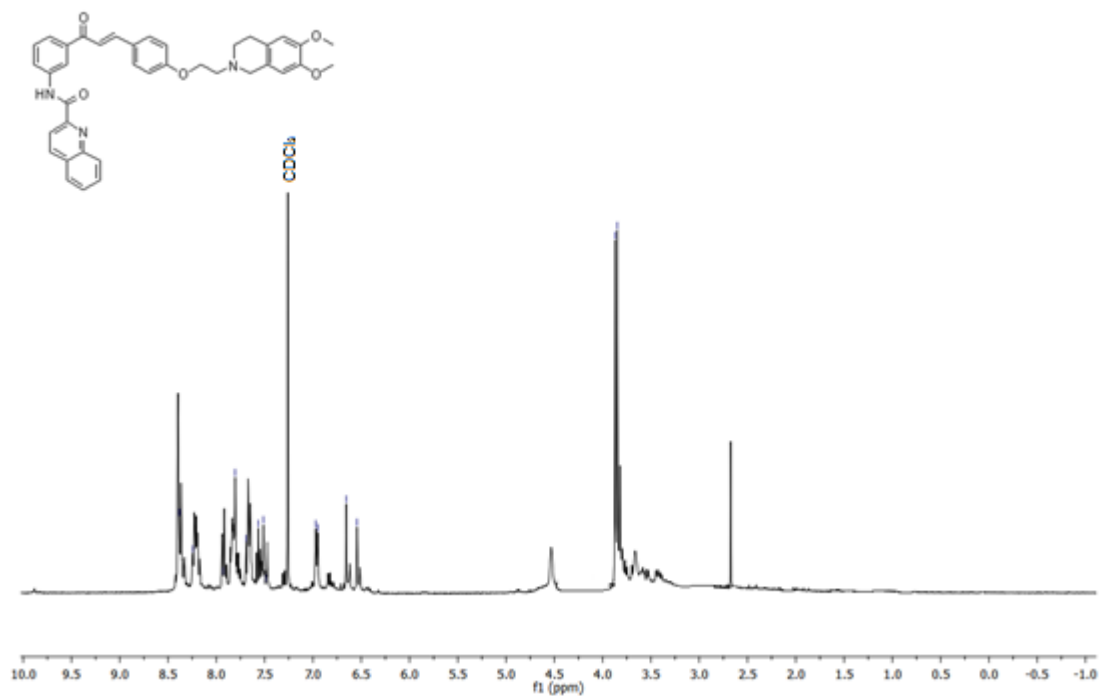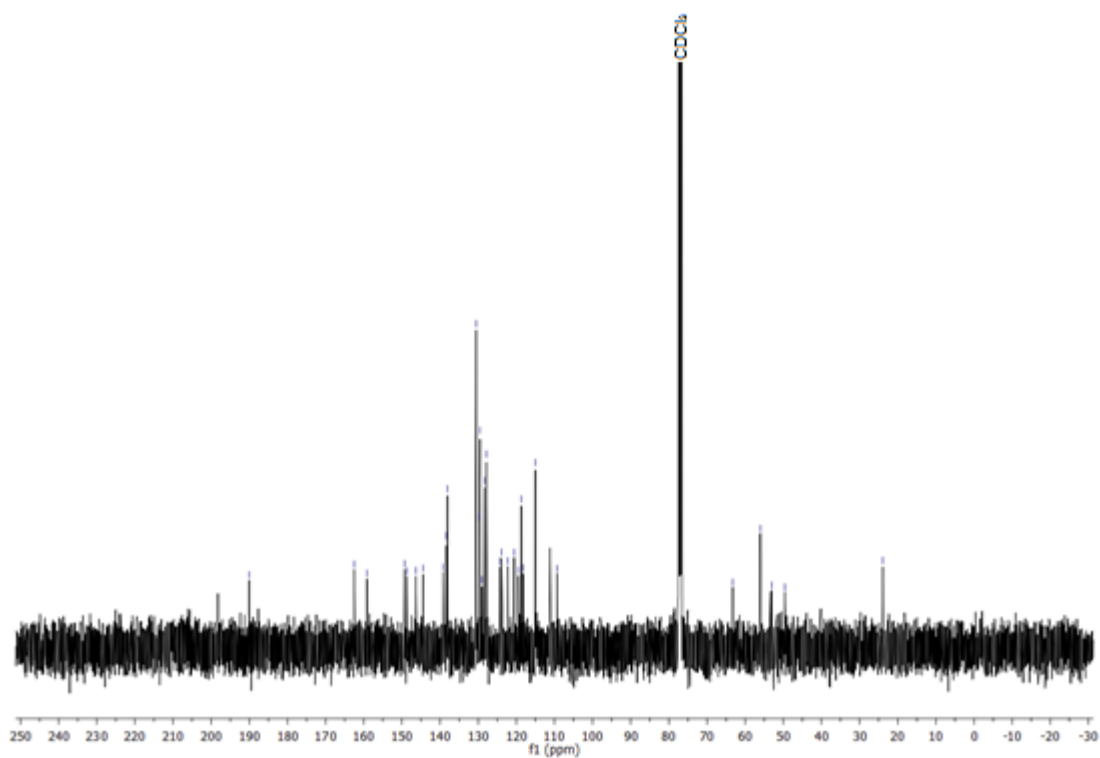



**(E)-N-(3-(3-(4-(2-(6-methoxy-7-(2-methoxyethoxy)-3,4-dihydroisoquinolin-2(1H)-yl)ethoxy)phenyl)acryloyl)phenyl)quinoline-2-carboxamide (16b)**

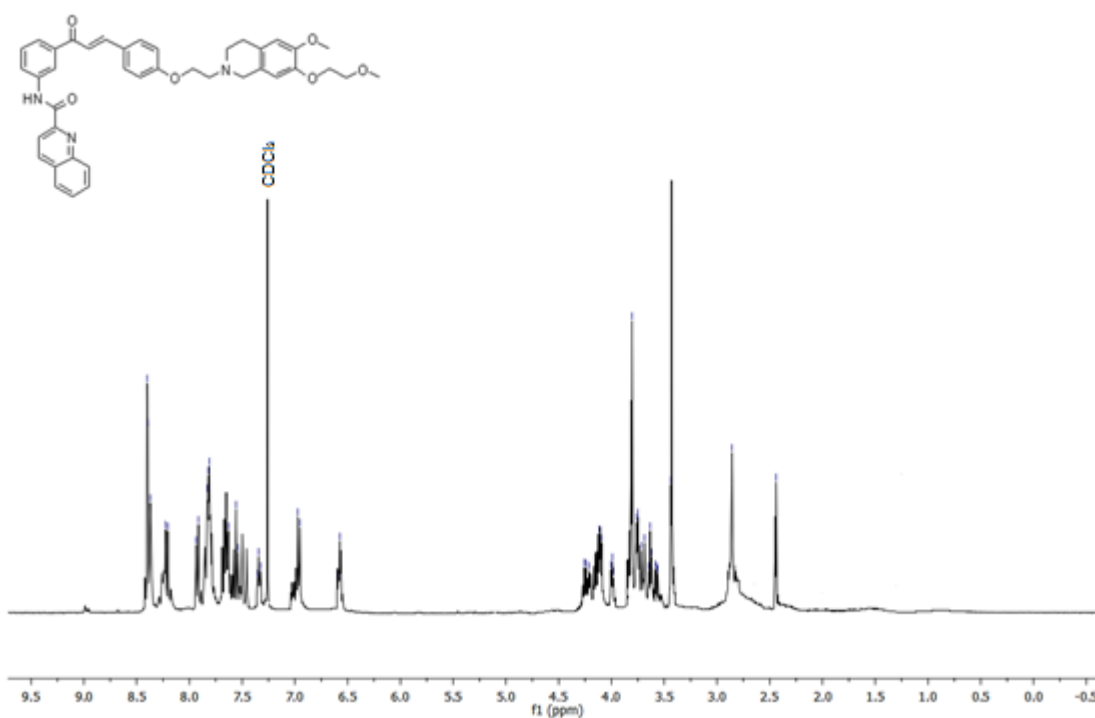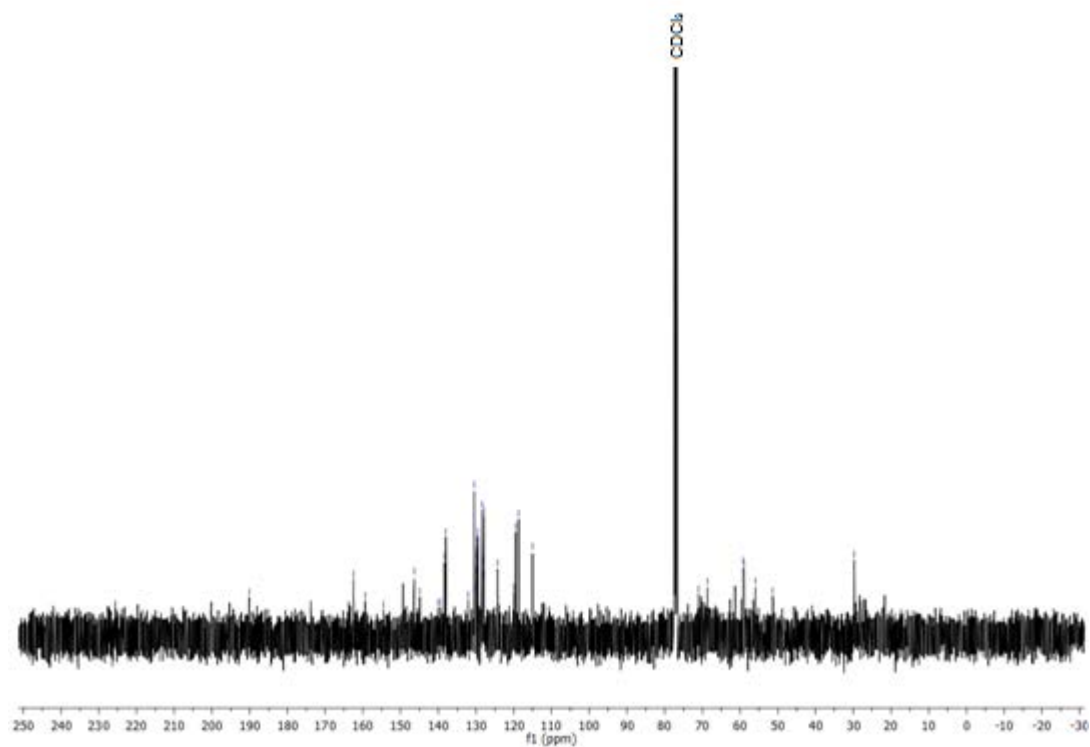

**(E)-N-(3-(3-(4-(2-(6,7-bis(2-(2-(2-methoxyethoxy)ethoxy)ethoxy)ethoxy)-3,4-dihydroisoquinolin-2(1H)-yl)ethoxy)phenyl)acryloyl)phenyl)quinoline-2-carboxamide (16c)**

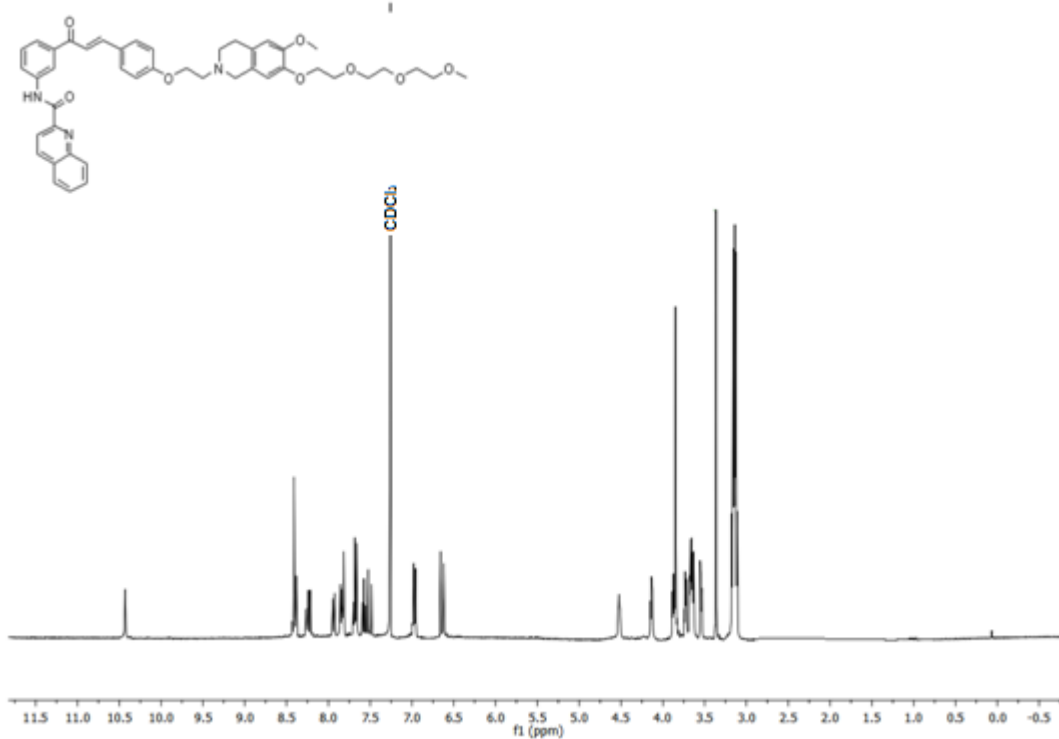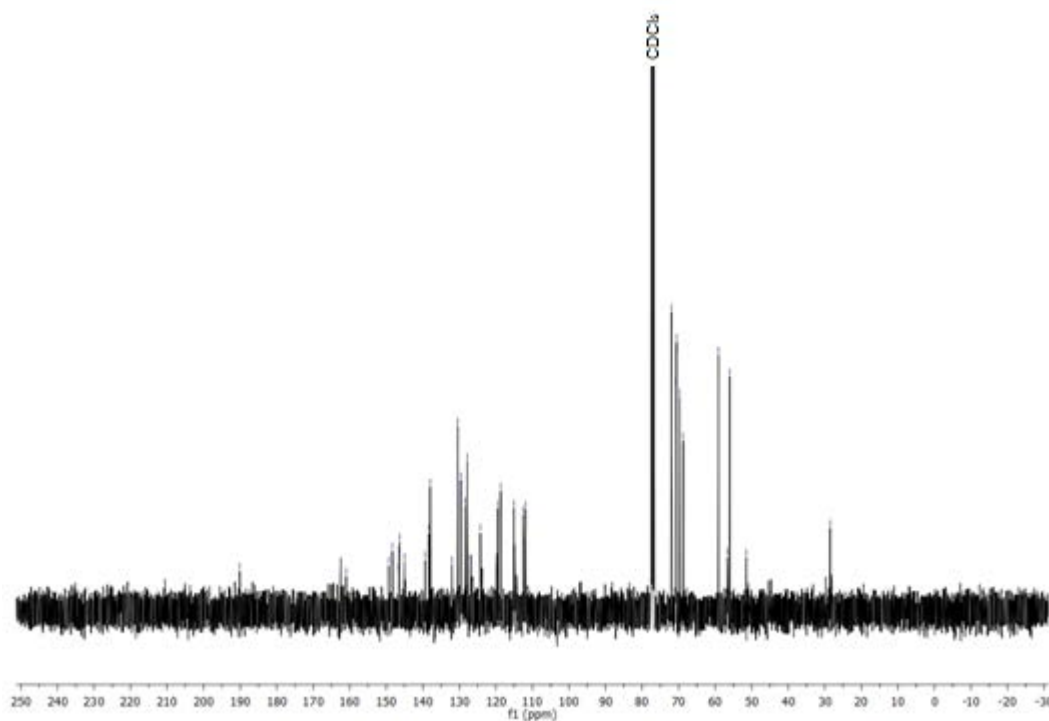

**(E)-N-(5-(3-(4-(2-(6,7-dimethoxy-3,4-dihydroisoquinolin-2(1H)-yl)ethoxy)phenyl)acryloyl)-2-methylphenyl)quinoline-2-carboxamide (16d)**

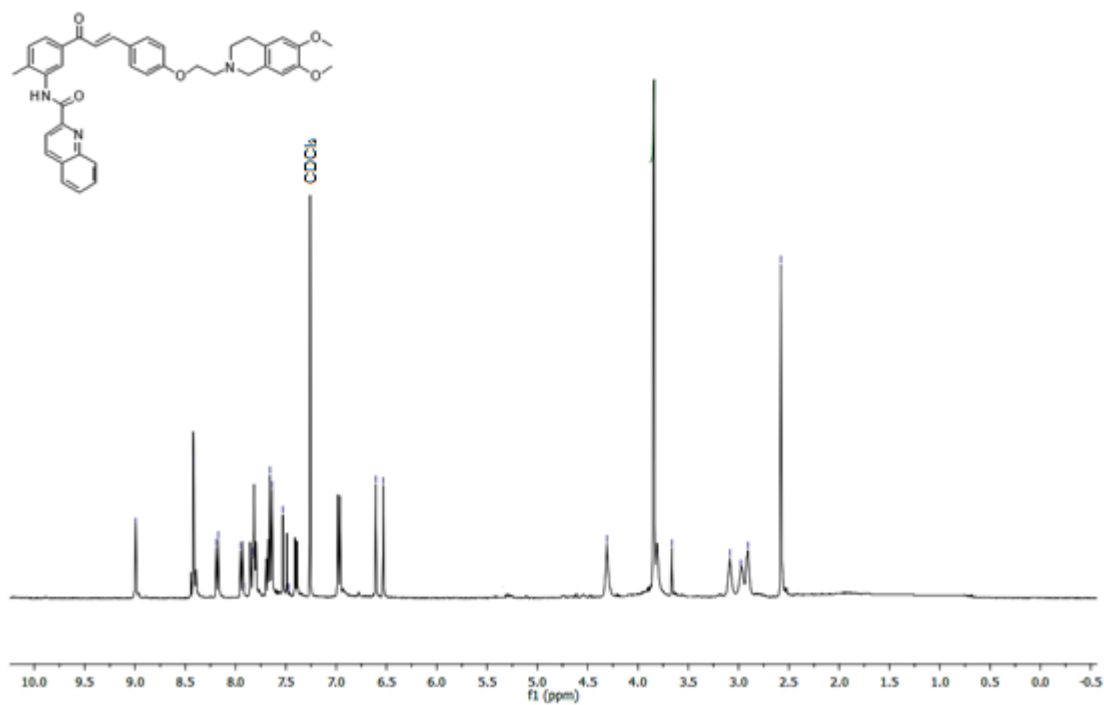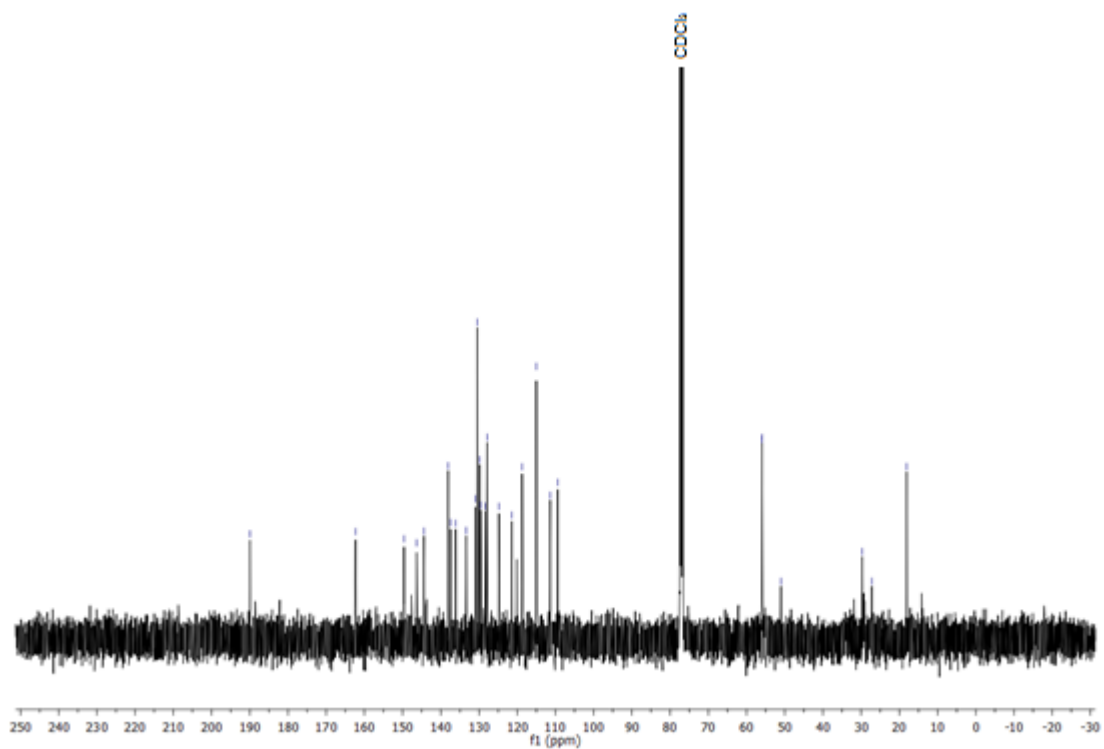

**(E)-N-(5-(3-(4-(2-(6,7-bis(2-methoxyethoxy)-3,4-dihydroisoquinolin-2(1H)-yl)ethoxy)phenyl)acryloyl)-2-methylphenyl)quinoline-2-carboxamide (16e)**

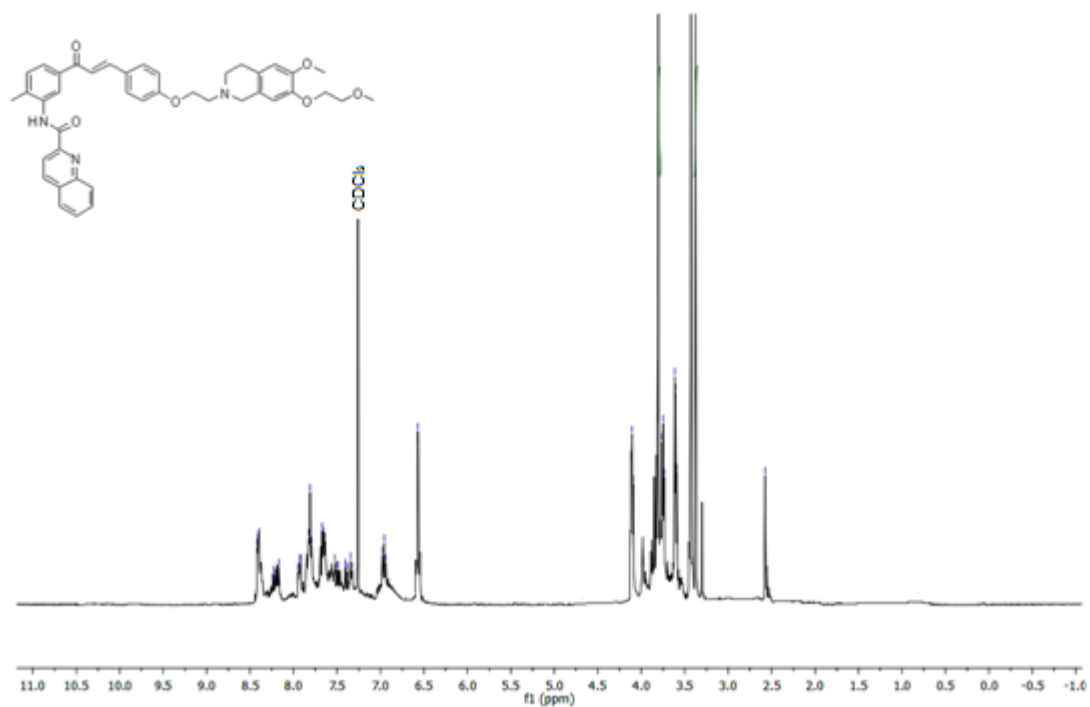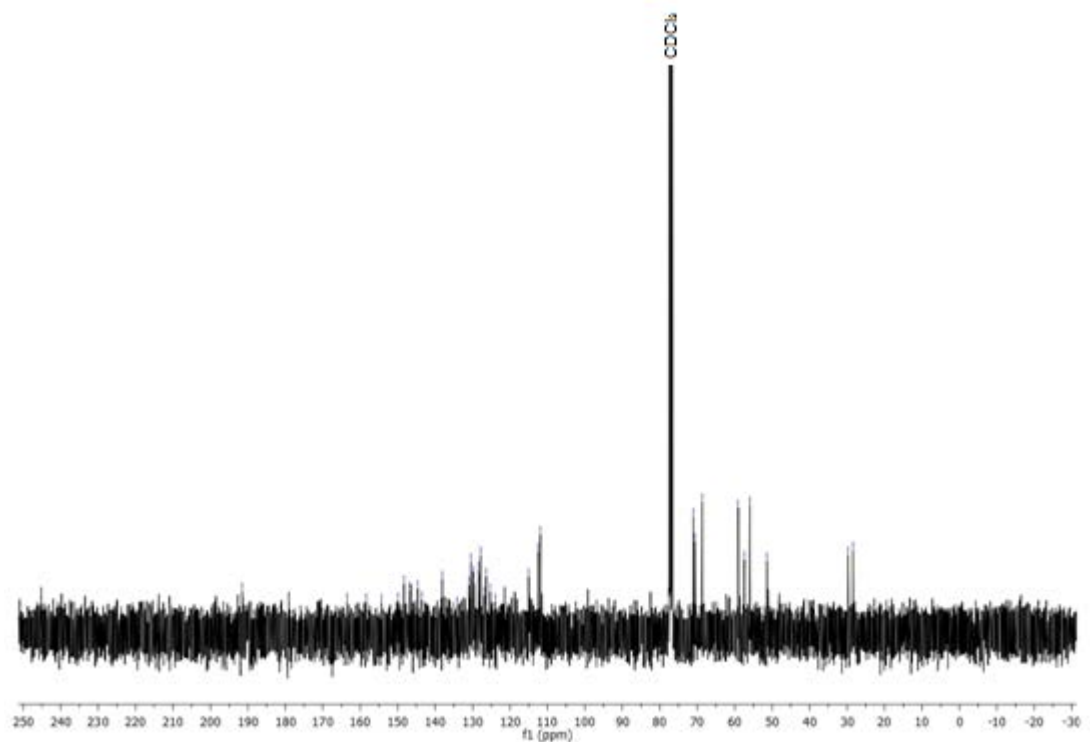

**(E)-N-(5-(3-(4-(2-(6,7-bis(2-(2-(2-methoxyethoxy)ethoxy)ethoxy)ethoxy)-3,4-dihydroisoquinolin-2(1H)-yl)ethoxy)phenyl)acryloyl)-2-methylphenyl)quinoline-2-carboxamide (16f)**

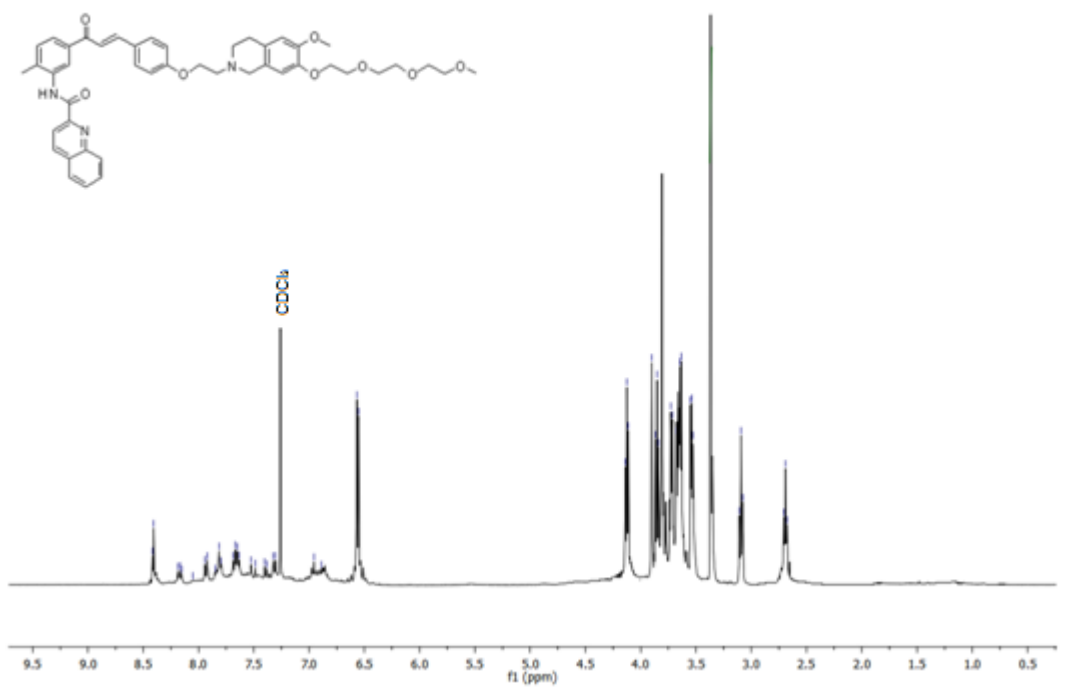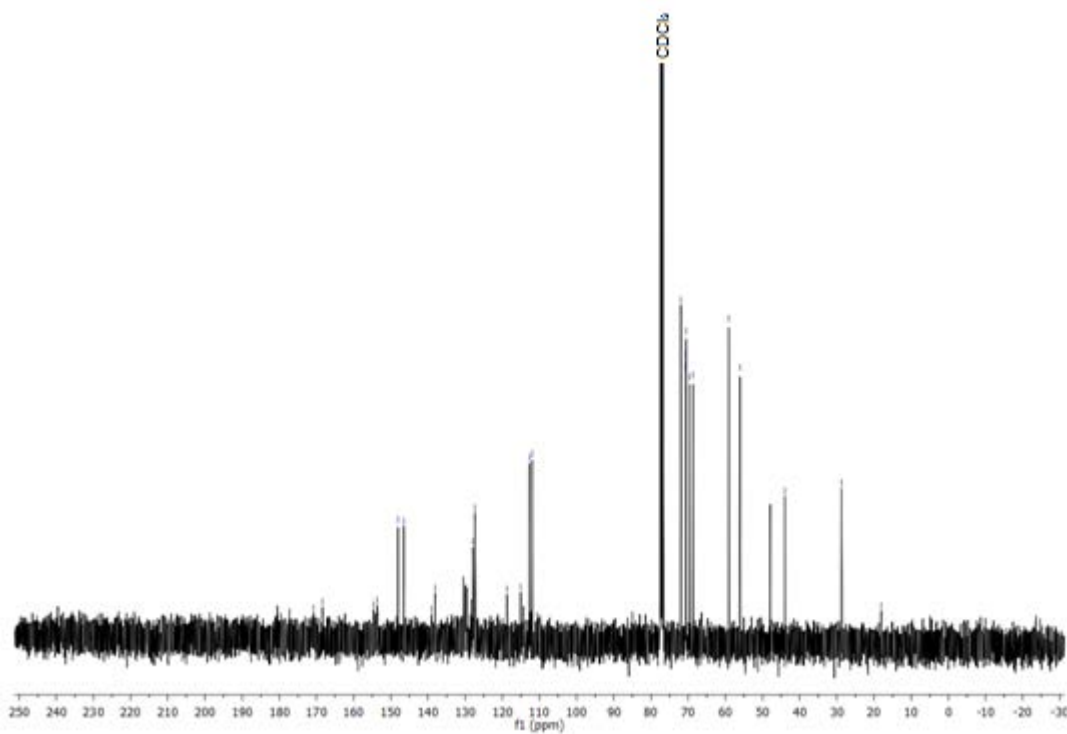

**N-(3-(2-(6,7-dimethoxy-3,4-dihydroisoquinolin-2(1H)-yl)acetyl)phenyl)quinoline-2-carboxamide  
(17a)**

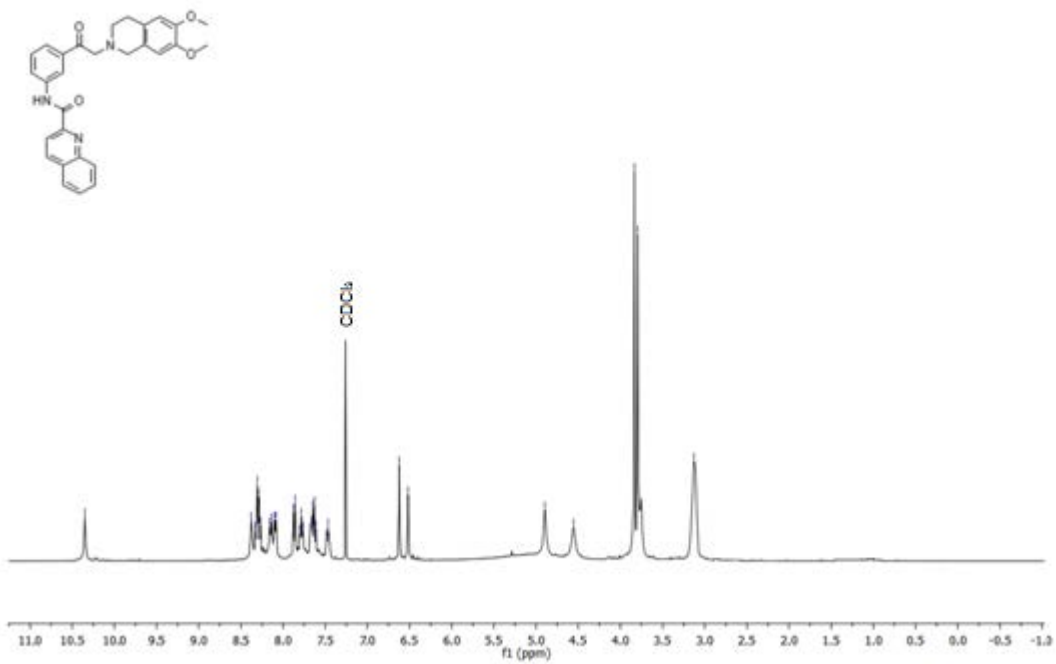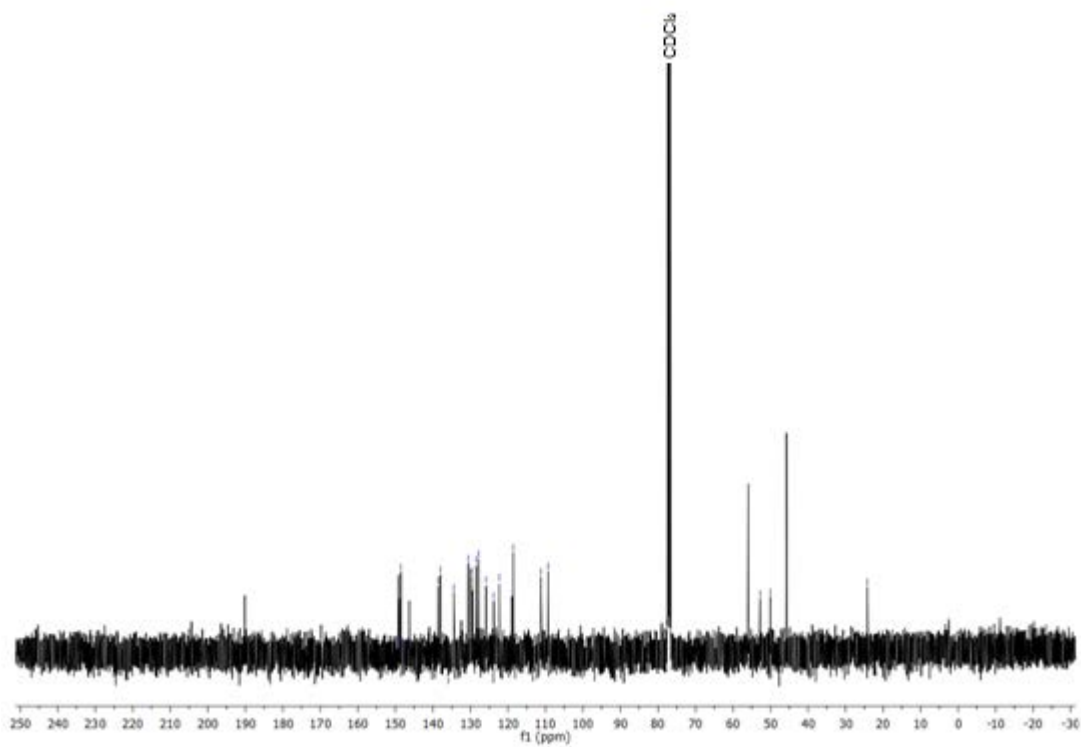

**N-(3-(2-(6-methoxy-7-(2-methoxyethoxy)-3,4-dihydroisoquinolin-2(1H)-yl)acetyl)phenyl)quinoline-2-carboxamide (17b)**

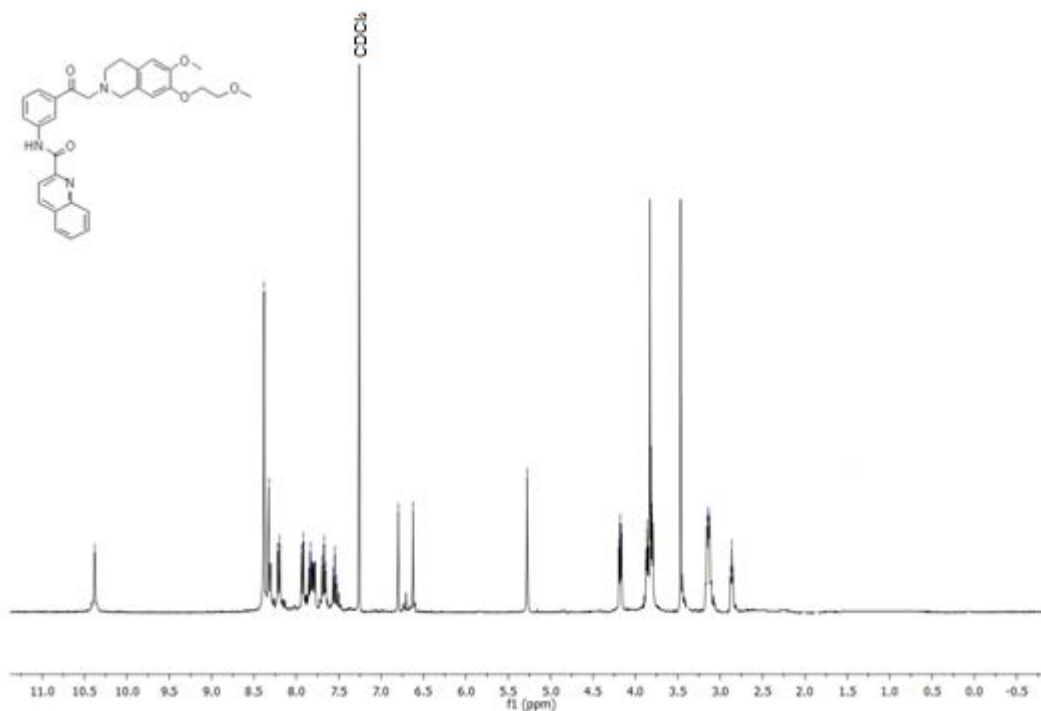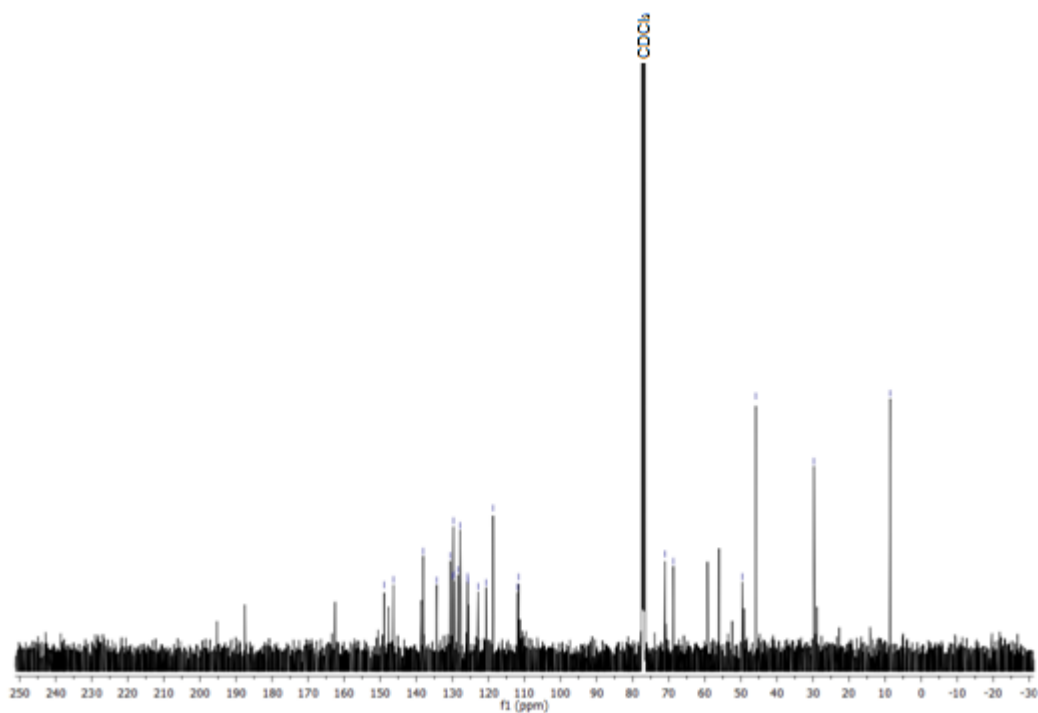

**N-(3-(2-(6,7-bis(2-(2-(2-methoxyethoxy)ethoxy)ethoxy)ethoxy)ethoxy)-3,4-dihydroisoquinolin-2(1H)-yl)acetyl)phenylquinoline-2-carboxamide (17c)**

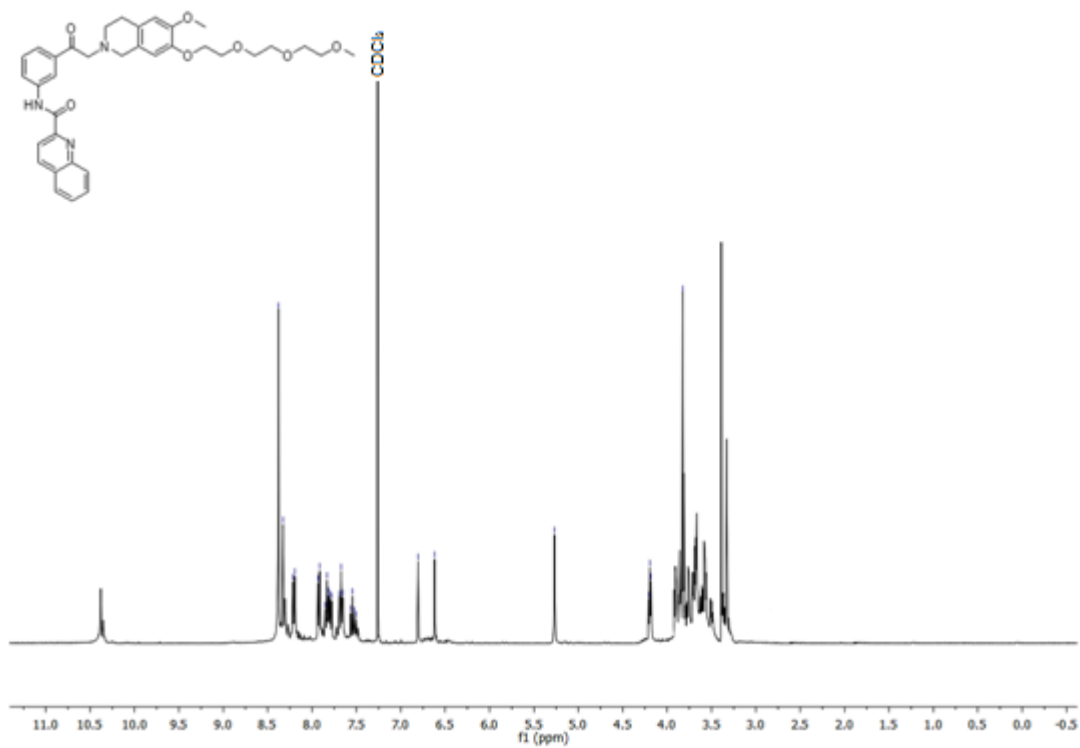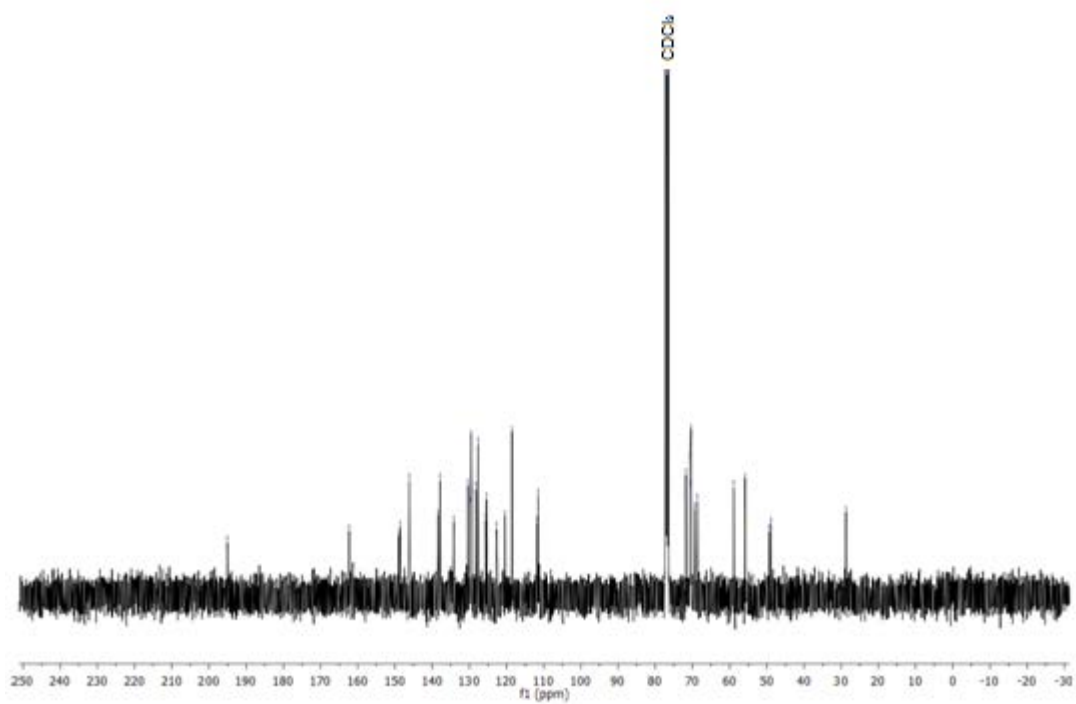



**N-(5-(2-(6,7-dimethoxy-3,4-dihydroisoquinolin-2(1H)-yl)acetyl)-2-methylphenyl)quinoline-2-carboxamide (17d)**

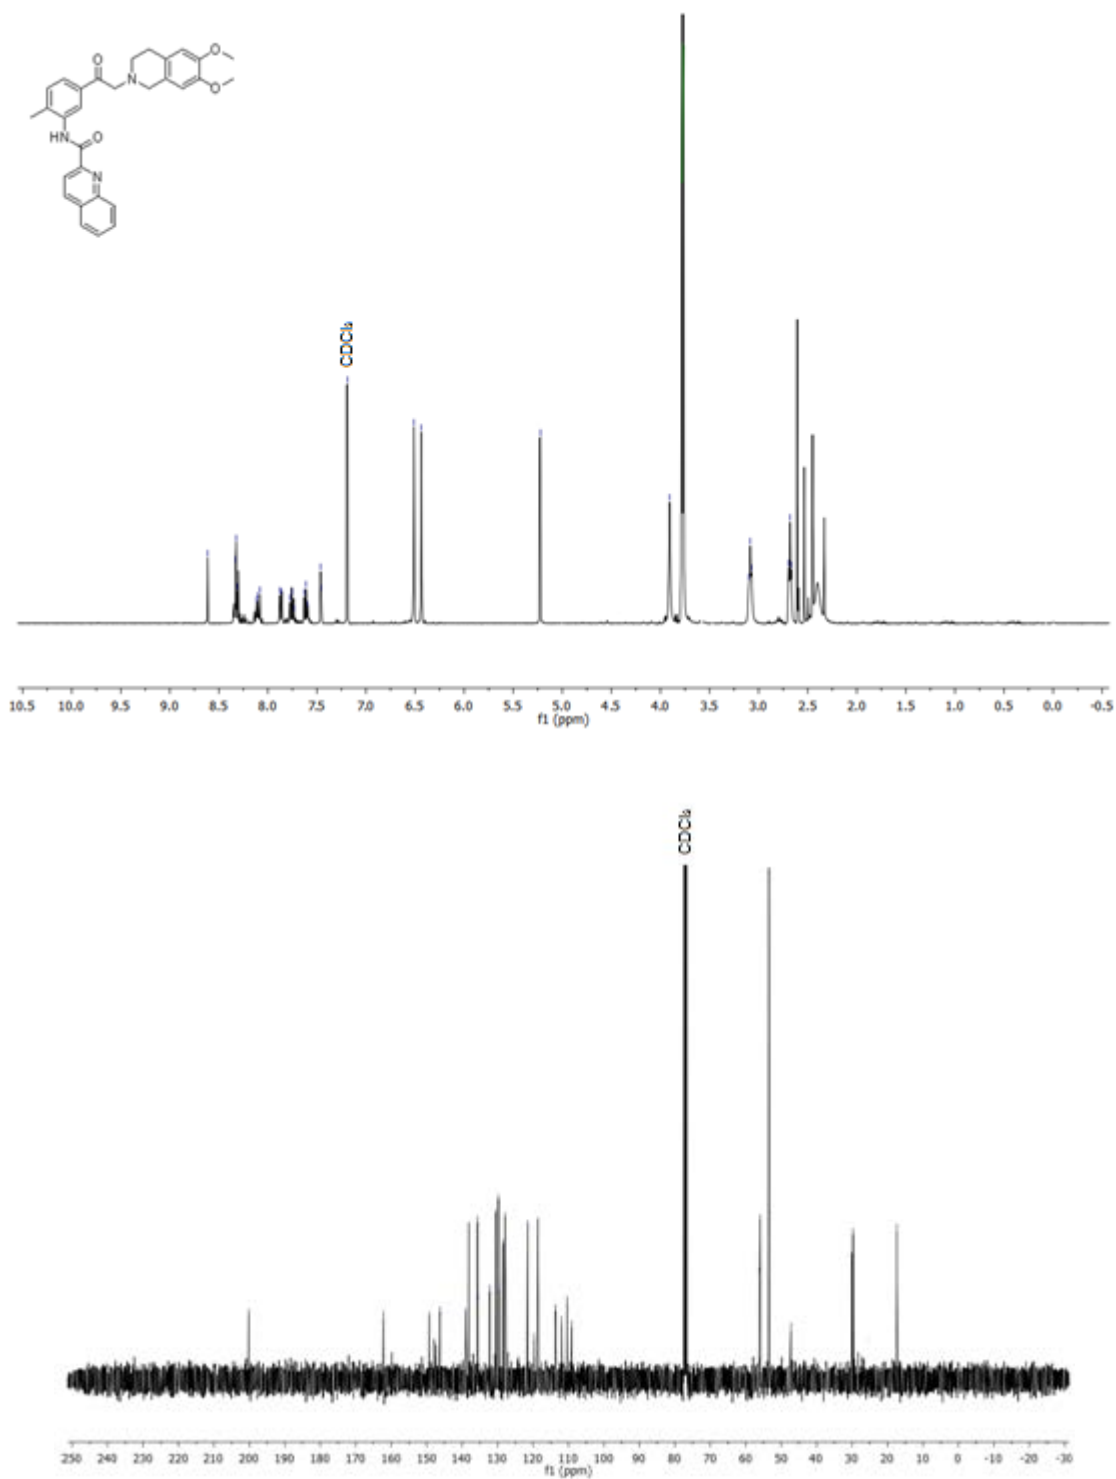

**N-(3-(2-(6-methoxy-7-(2-methoxyethoxy)-3,4-dihydroisoquinolin-2(1H)-yl)acetyl)phenyl)quinoline-2-carboxamide (17e)**

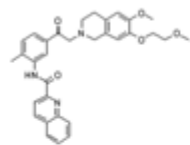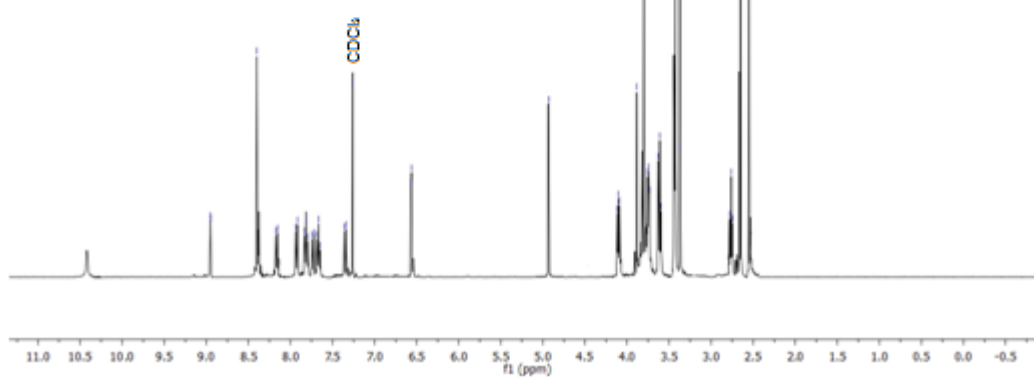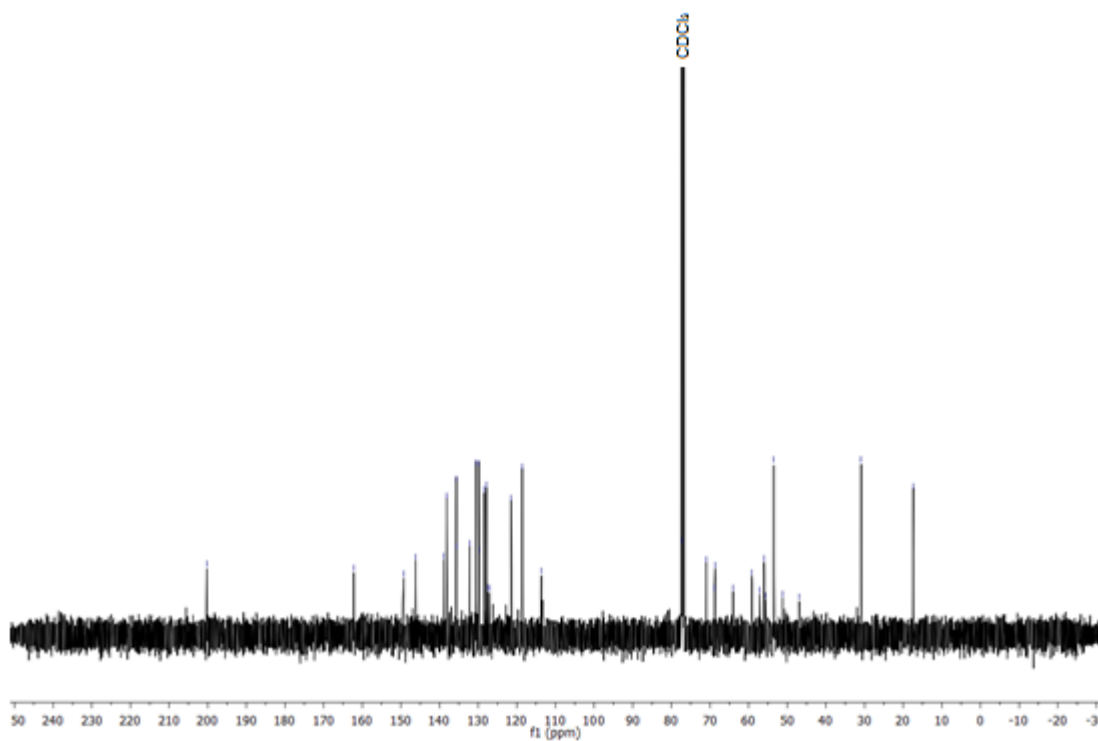



## 1.5 Purity (determined by HPLC)

Table 1: Purities of key compounds

| Compound | Purity (%) | Retention time (min) |
|----------|------------|----------------------|
| 16a      | 96         | 16.7                 |
| 16b      | 96         | 16.8                 |
| 16c      | 97         | 16.8                 |
| 16d      | 95         | 17.7                 |
| 16e      | 96         | 17.4                 |
| 16f      | 95         | 17.4                 |
| 17a      | 95         | 14.1                 |
| 17b      | 97         | 14.1                 |
| 17c      | 95         | 14.1                 |
| 17d      | 95         | 15.1                 |
| 17e      | 97         | 15.0                 |
| 17f      | 95         | 14.5                 |

Compound **16a** in DMSO, 0.1  $\mu$ L injected; Detector: 220 nm

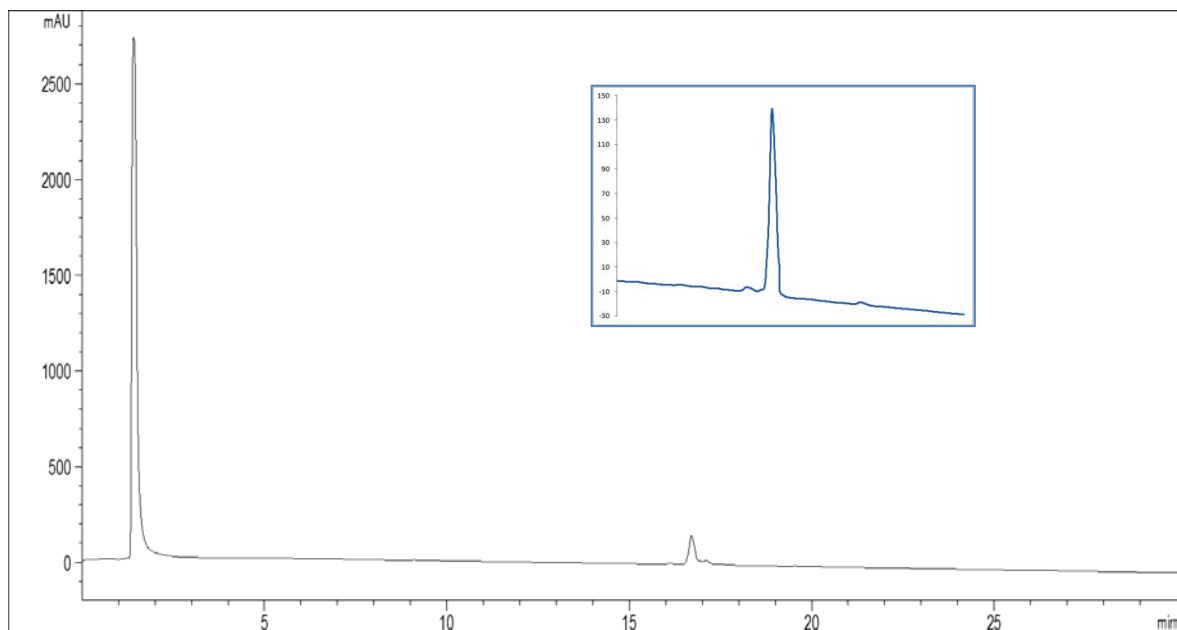

Compound **16b** in DMSO, 0.1  $\mu$ L injected; Detector: 220 nm

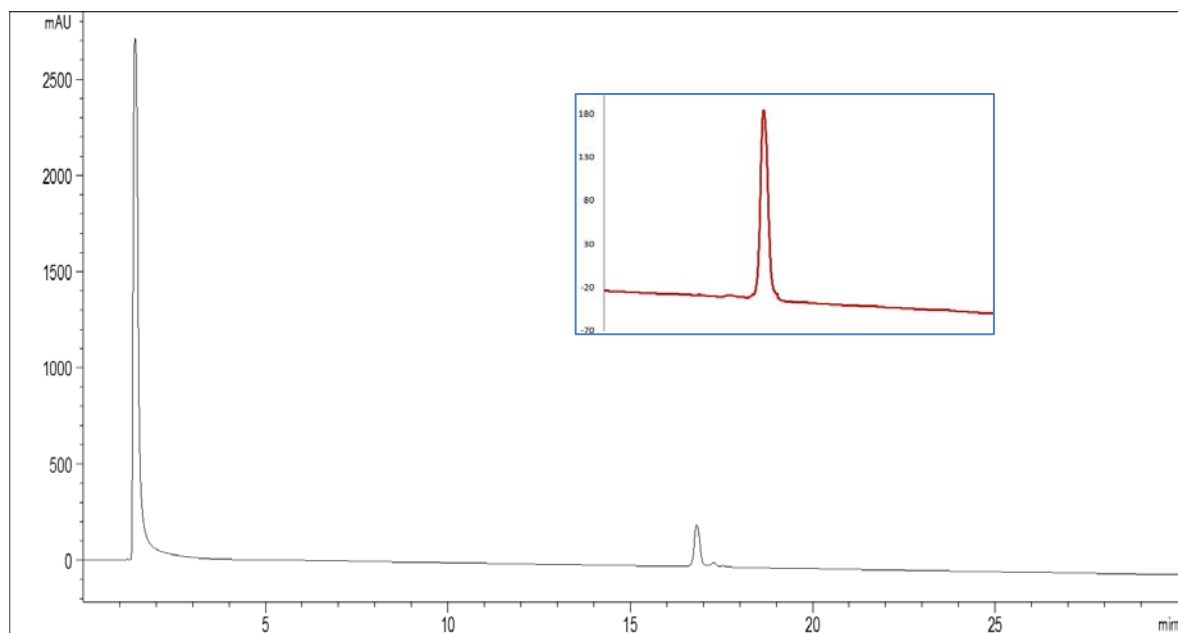

Compound **16c** in DMSO, 0.1  $\mu$ L injected; Detector: 220 nm

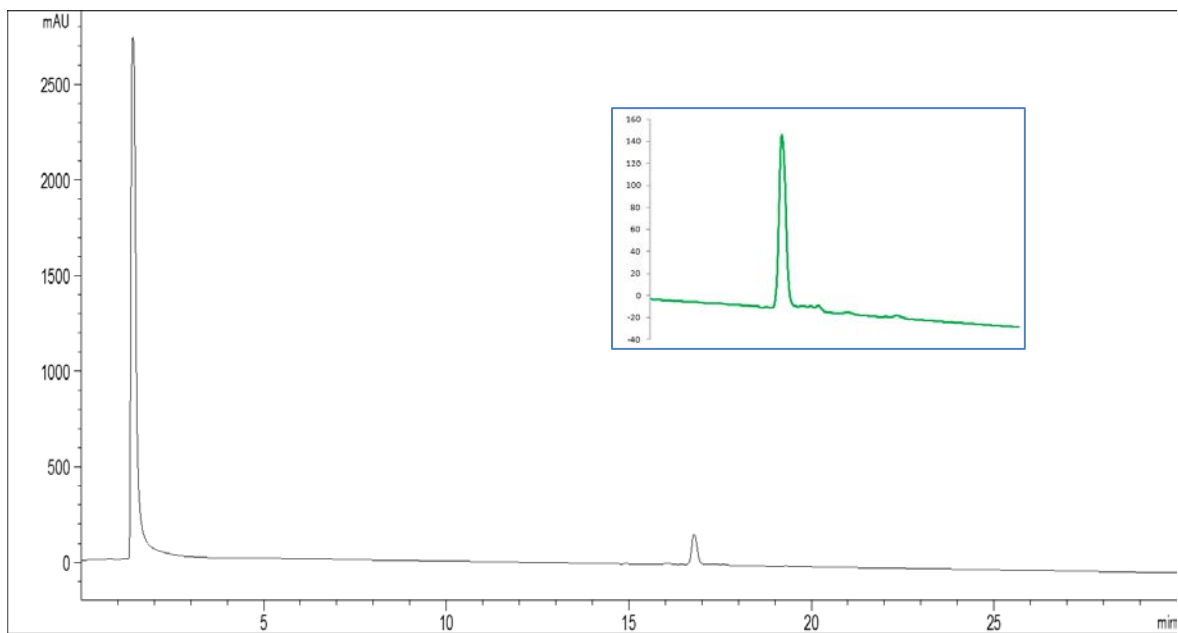

Compound **16d** in DMSO, 0.1  $\mu$ L injected; Detector: 220 nm

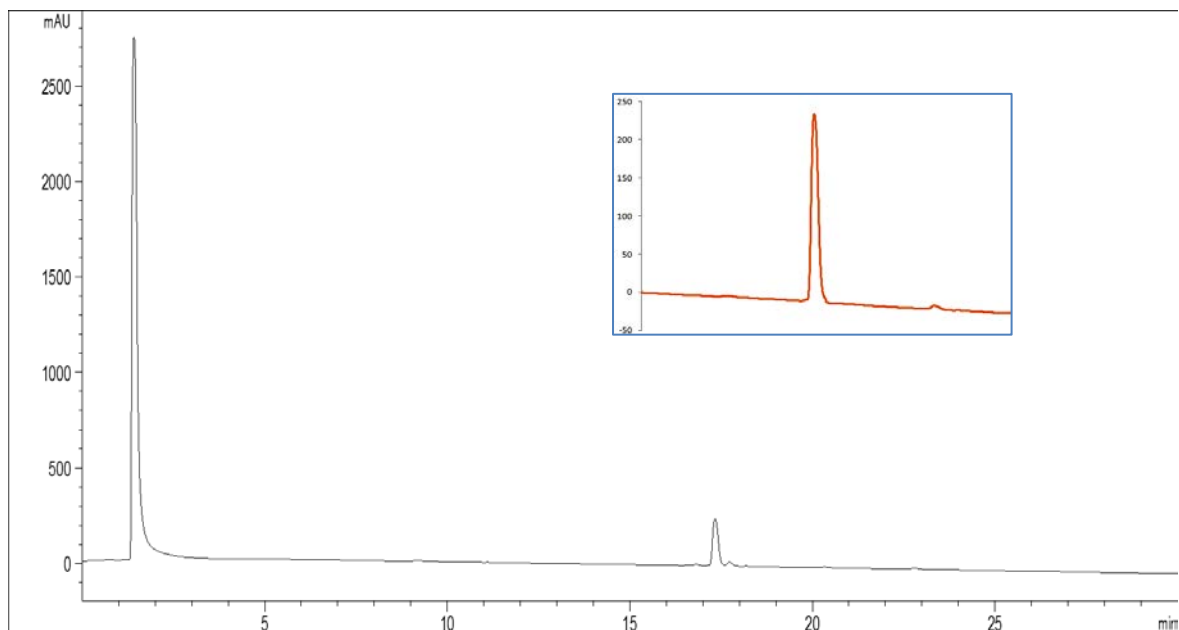

Compound **16e** in DMSO, 0.1  $\mu$ L injected; Detector: 220 nm

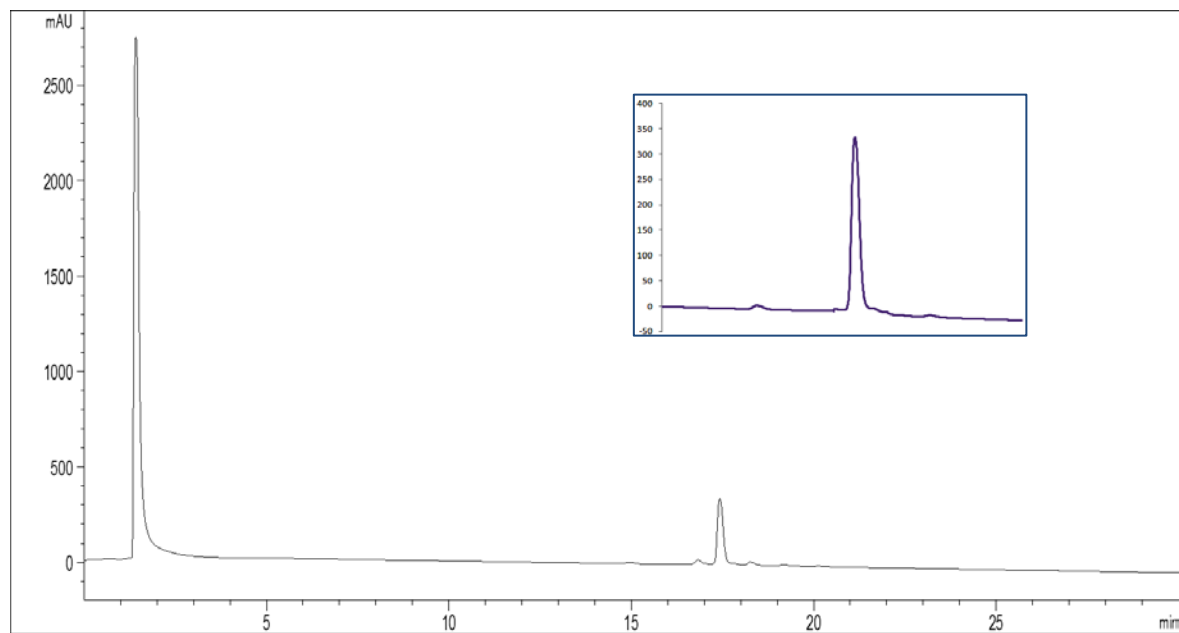

Compound **16f** in DMSO, 0.1  $\mu$ L injected; Detector: 220 nm

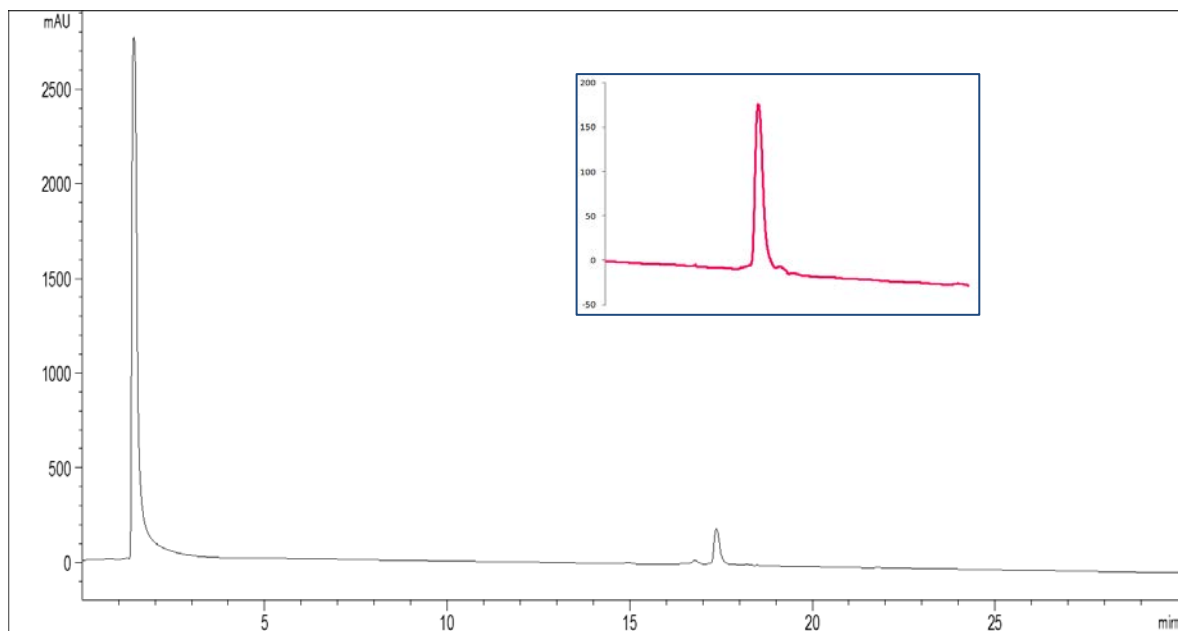

Compound **17a** in DMSO, 0.1  $\mu$ L injected; Detector: 220 nm

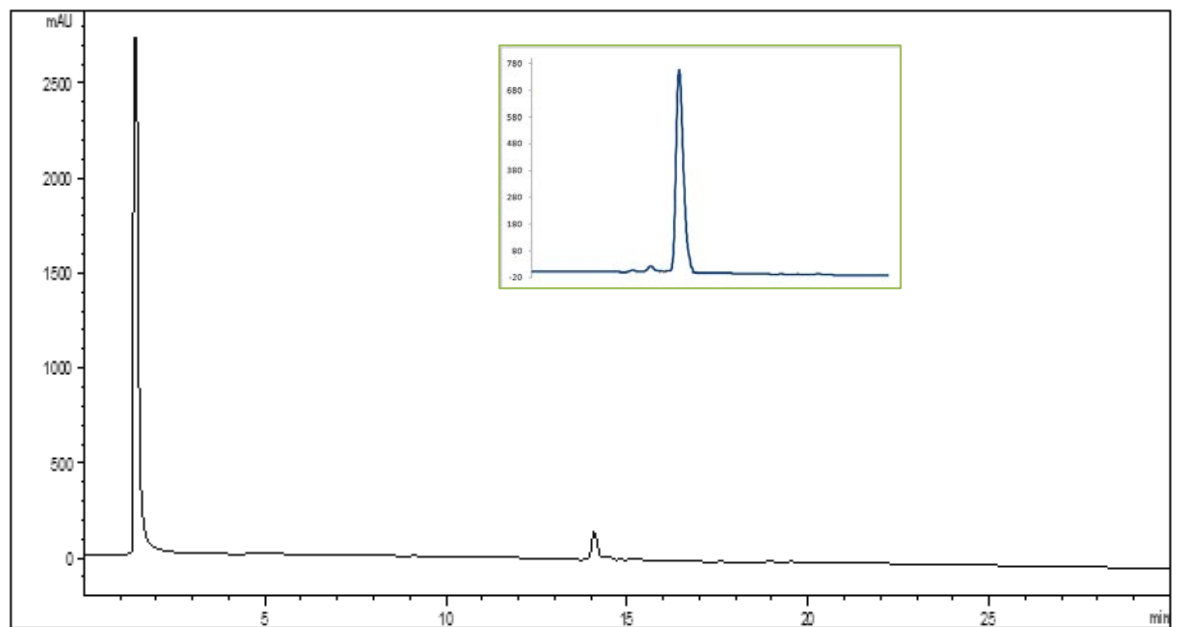

Compound **17b** in DMSO, 0.1  $\mu$ L injected; Detector: 220 nm

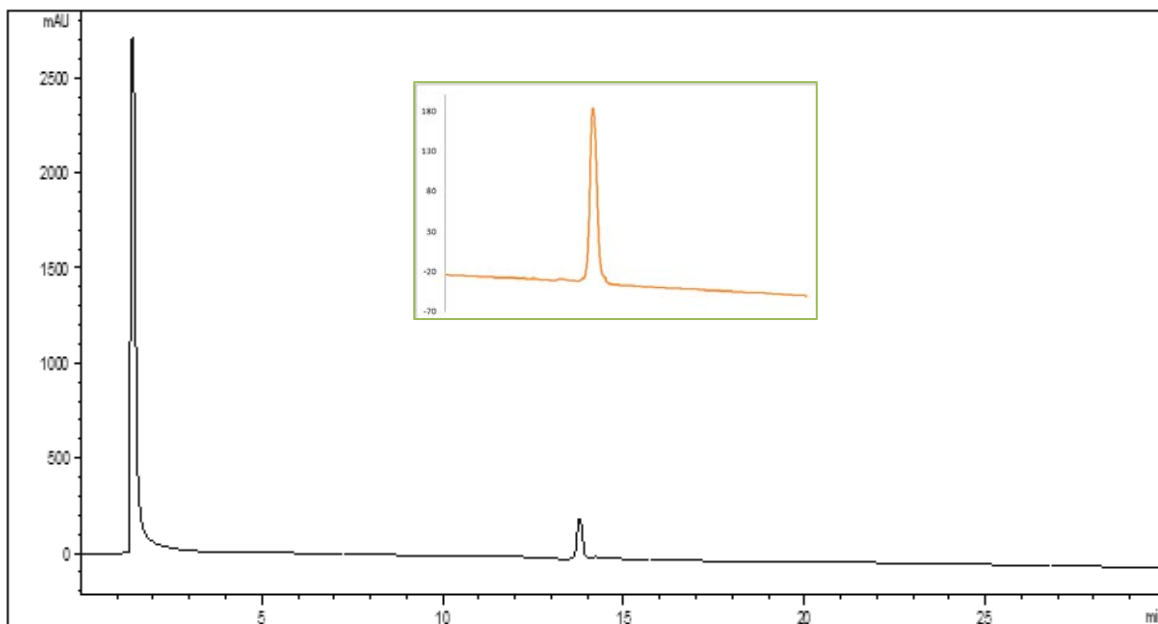

Compound **17c** in DMSO, 0.1  $\mu$ L injected; Detector: 220 nm

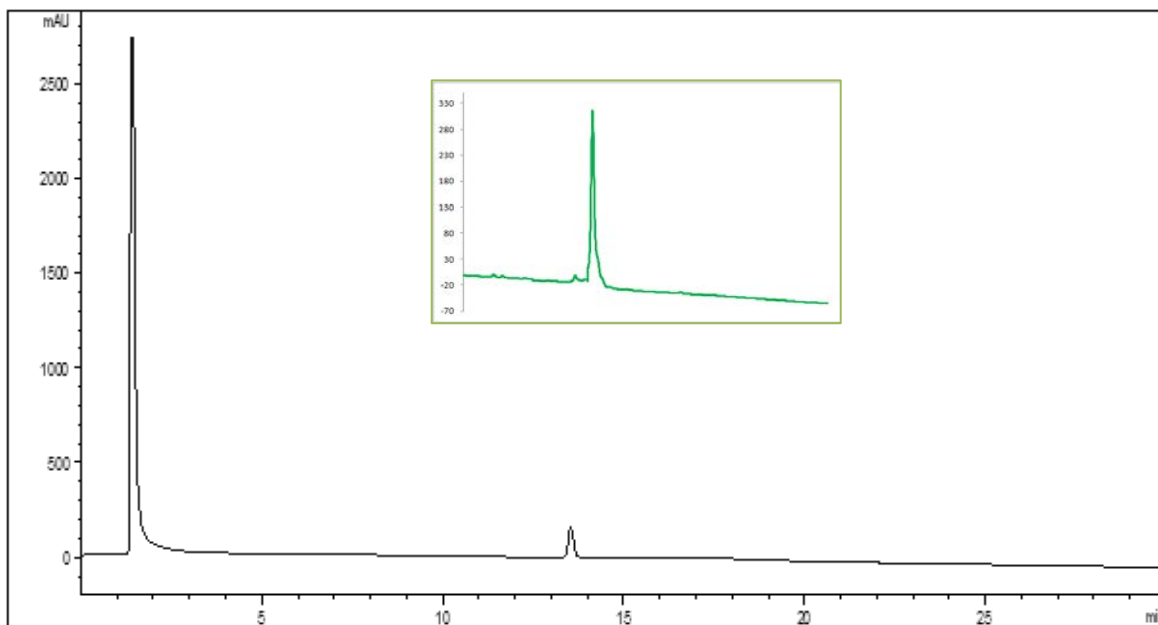



Compound **17d** in DMSO, 0.1  $\mu$ L injected; Detector: 220 nm

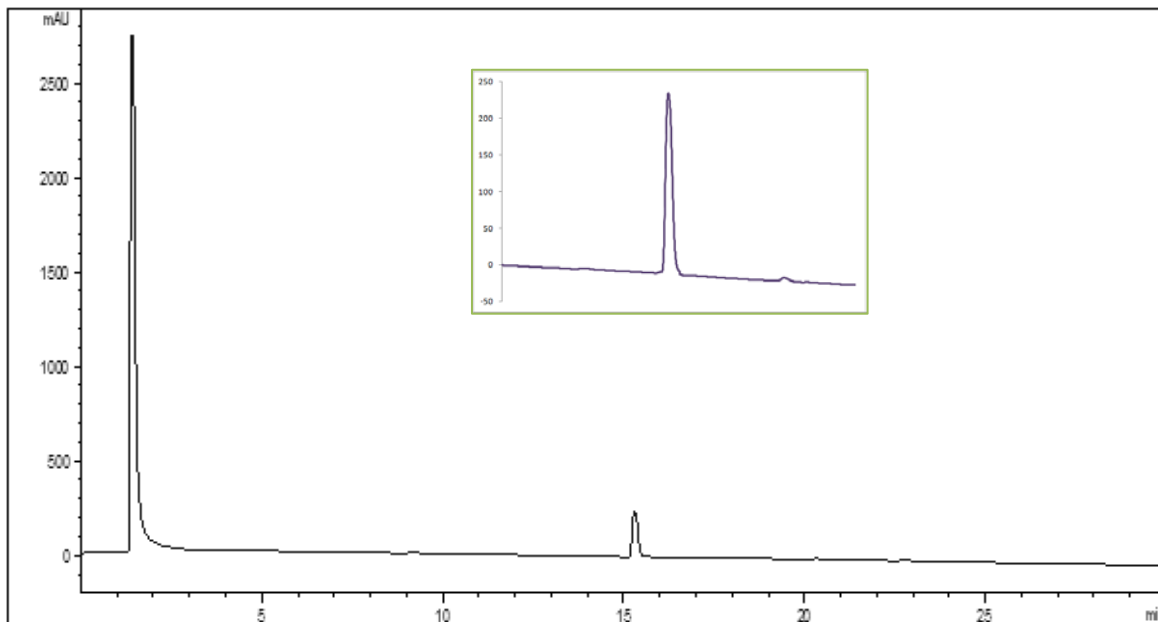

Compound **17e** in DMSO, 0.1  $\mu$ L injected; Detector: 220 nm

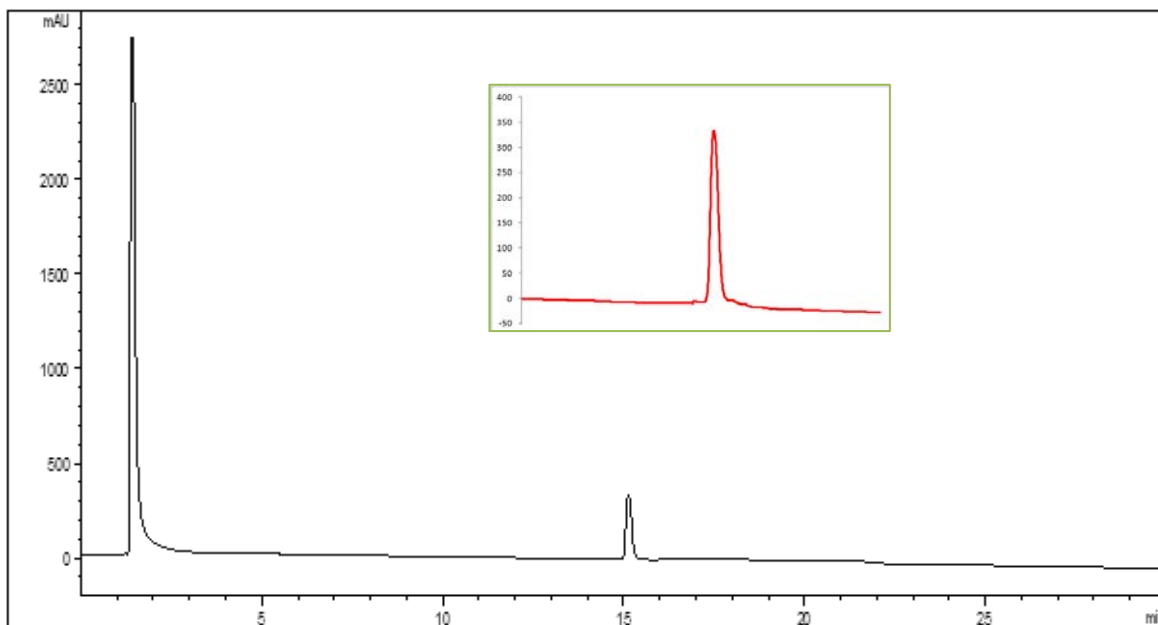

Compound **17f** in DMSO, 0.1  $\mu$ L injected; Detector: 220 nm

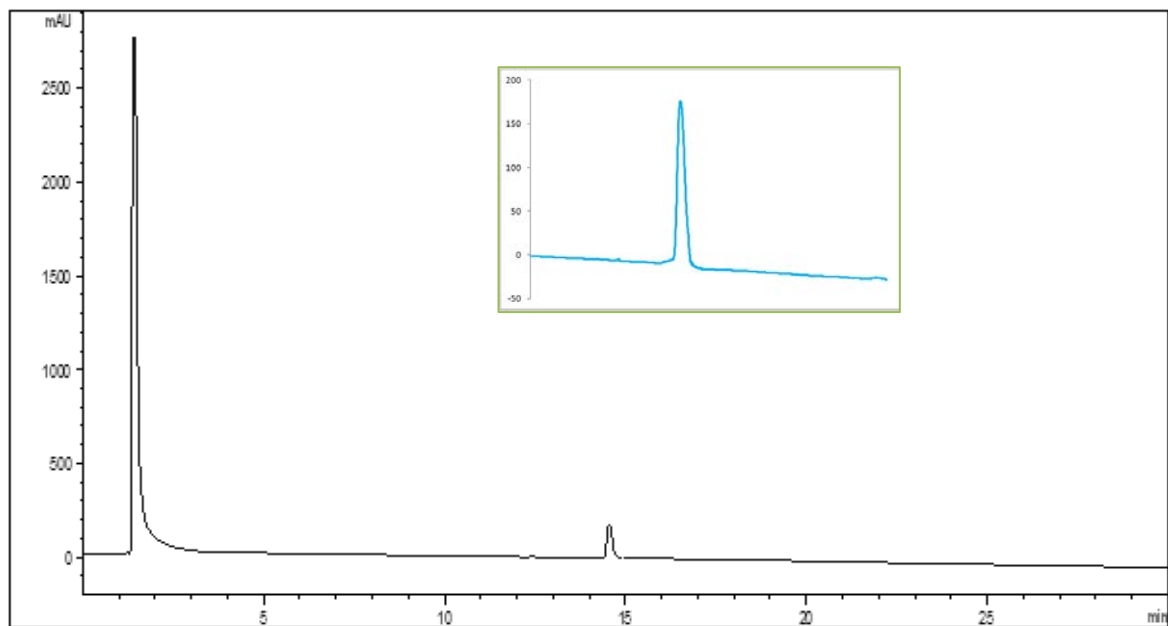

## 2. Pharmacological evaluation

### 2.1 Chemicals and test compounds

Hoechst 33342 (Invitrogen, Karlsruhe, Germany) was dissolved in sterile water to produce a 0.8 mM working solution. Calcein-AM (4 mM in anhydrous DMSO) and pluronic F127 were obtained from Biotium (Hayward, CA, USA) and diluted to 100  $\mu$ M. Bovine serum albumin (BSA) was purchased from Serva (Heidelberg, Germany). Fumitremorgin C (FTC; Merck, Darmstadt, Germany) was also dissolved in DMSO and diluted to a concentration of 1 mM. Reversan was purchased from Tocris Bioscience (Bristol, UK) and diluted to a 3 mM working solution in DMSO. Topotecan and vinblastine for cell culture supplementation were purchased from Sigma (Munich, Germany). Loading buffer (calcein-AM assay) was made of 120 mM NaCl, 5 mM KCl, 2 mM MgCl<sub>2</sub>·6H<sub>2</sub>O, 1.5 mM CaCl<sub>2</sub>·2H<sub>2</sub>O, 25 mM HEPES, 10 mM glucose, pH 7.4. PBS (phosphate buffered saline) was made of 8.0 g/L NaCl, 1.0 g/L Na<sub>2</sub>HPO<sub>4</sub>·2H<sub>2</sub>O, 0.20 g/L KCl, 0.20 g/L KH<sub>2</sub>PO<sub>4</sub> and 0.15 g/L NaH<sub>2</sub>PO<sub>4</sub>·H<sub>2</sub>O. The pH value was adjusted to 7.4. A solution of 4% (m/m) paraformaldehyde (PFA) in PBS was made by stirring 2 g of PFA per 50 g total solution while heating on a magnetic stirrer for approximately 30 min. The test compounds were dissolved in DMSO at a concentration of 10 mM if possible, depending on the solubility of the compounds. All stock solutions were stored at -20 °C. If not otherwise stated, chemicals (p.a. quality) were obtained from Merck (Darmstadt, Germany). Purified water (Milli-Q system, Millipore, Eschborn, Germany) was used throughout.

### 2.2 Cells and culture conditions

MCF-7/Topo cells, an ABCG2-overexpressing subclone of MCF-7 cells (ATCC® HTB-22™, American Type Culture Collection, Manassas, VA), were obtained as described [10] and cultured in water-saturated atmosphere (95% air, 5% CO<sub>2</sub>) at 37 °C in 75-cm<sup>2</sup> culture flasks from Nunc (Wiesbaden, Germany) in Dulbecco's Modified Eagle Medium (DMEM; Sigma, Munich, Germany) containing L-glutamine, 2.2 g/L NaHCO<sub>3</sub> and 110 mg/L sodium pyruvate, supplemented with 10% fetal calf serum (FCS; Biochrom, Berlin, Germany) and 550 nM topotecan to induce overexpression of the ABCG2 transporter. Human Kb-V1 cells, an ABCB1-overexpressing subclone of Kb cells (ATCC® CCL-17™), were obtained and cultured as described [10]. MDCKII-MRP1 cells: MDCKII cells (Madin-Darby Canine Kidney cells, strain II; a dog epithelial cell line; ATCC® CRL-2936™), transfected with human ABCC1, [11, 12] were a kind gift from Prof. Dr. P. Borst from the Netherland Cancer Institute (Amsterdam, NL).

The cells were cultured in DMEM supplemented with 10% FCS, 3.7 g/L NaHCO<sub>3</sub> and 110 mg/L sodium pyruvate. Trypsinization was performed at 37 °C (95% air, 5% CO<sub>2</sub>) for 2 min for MCF/Topo and Kb-V1 cells using 0.1% trypsin /0.04% EDTA and for 20-30 min using 0.2% trypsin / 0.08% EDTA. All cells were routinely monitored for mycoplasma contamination by PCR (Venor GeM, Minerva Biolabs, Berlin, Germany) and only mycoplasma-negative cultures were used.

### **2.3 Calcein-AM microplate assay for the determination of ABCB1 modulation**

Kb-V1 cells were seeded into flat-bottomed 96-well plates (Greiner, Frickenhausen, Germany) at a density of 20,000 cells per well. On the following day, cells were washed with loading buffer (120 mM NaCl, 5 mM KCl, 2 mM MgCl<sub>2</sub>.6H<sub>2</sub>O, 1.5 mM CaCl<sub>2</sub>.2H<sub>2</sub>O, 25 mM HEPES, 10 mM glucose, pH 7.4) in order to remove unspecific serum esterases. Afterwards, cells were incubated with loading suspension (loading buffer, 5 mg/mL BSA, 1.25 µL/mL pluronic F127 (20% in DMSO)) containing 0.5 µM calcein-AM and the test compounds at increasing concentrations (10 nM – 100 µM) for 10 min (37 °C / 5% CO<sub>2</sub>) to construct concentration-response curves. Tariquidar served as positive control at a final concentration of 10 µM corresponding to 100% inhibition of calcein-AM efflux. In general, test compounds were investigated as triplicates, controls as sextuplicates, respectively. Subsequently, the loading suspension was discarded, and cells were fixed with 4% PFA solution in PBS for 30 min. After three washing steps, fixed cells were overlaid with loading buffer and relative fluorescence intensities were determined with a GENios Pro microplate reader (Tecan Deutschland, Crailsheim, Germany). Measurement mode: fluorescence top; excitation filter: 485/20; emission filter: 535/25; number of reads: 10; integration time: 40 µs; lag time: 0 µs; mirror selection: Dichroic 3; plate definition file: GRE96ft.pdf; multiple reads per well (Circle): 3x3; time between move and flash: 100 ms. On each plate, the optimal gain was calculated by determination of the fluorescence intensity in the presence of the reference substance, tariquidar. Relative IC<sub>50</sub> values were calculated using GraphPad Prism 7, “Four parameter curve” fitting. Errors were expressed as standard error of the mean (SEM) [13].

### **2.4 Calcein-AM microplate assay for the determination of ABCC1 modulation**

MDCKII cells were seeded into flat-bottomed 96-well plates at a density of about 20,000 cells/well. On the following day, cells were washed with loading buffer in order to remove unspecific serum esterases. Afterwards, cells were incubated with loading suspension (loading buffer, 5 mg/mL BSA, 1.25 µL/mL

pluronic F127 (20% (m/v) in DMSO)) containing 0.5  $\mu\text{M}$  calcein-AM and the test compound at increasing concentrations (10 nM-100  $\mu\text{M}$ ) for 60 min (37 °C / 5%  $\text{CO}_2$ ). Reversan served as positive control at a final concentration of 30  $\mu\text{M}$  corresponding to 100% ABCG1 inhibition. In general, test compounds were investigated as triplicates, controls as sextuplicates, respectively. Subsequently, the loading suspension was discarded, and the cells were fixed with 4% PFA solution for 30 min. After three washing circles (loading buffer), fixed cells were overlaid with loading buffer, and relative fluorescence intensities were determined with a GENios Pro microplate reader (Tecan Deutschland, Crailsheim, Germany). Measurement mode: fluorescence top; excitation filter: 485/20; emission filter: 535/25; number of reads: 10; integration time: 40  $\mu\text{s}$ ; lag time: 0  $\mu\text{s}$ ; mirror selection: Dichroic 3; plate definition file: GRE96ft.pdf; multiple reads per well (Circle): 3x3; time between move and flash: 100 ms. On each plate, the optimal gain was calculated by determination of the fluorescence intensity in the presence of the reference substance, tariquidar. Relative  $\text{IC}_{50}$  values were calculated using GraphPad Prism 7, "Four parameter curve" fitting. Errors were expressed as standard error of the mean (SEM) [13].

## **2.5 Hoechst 33342 microplate assay for the determination of ABCG2 modulation**

Optimal conditions of the assay were systematically determined as described elsewhere [14] with slight modifications. MCF-7/Topo cells were seeded into 96-well plates at a density of 20,000 cells/well (total volume: 100  $\mu\text{L}$ ) and allowed to attach to the surface of the microplates overnight in a water-saturated atmosphere (95% air, 5%  $\text{CO}_2$ ) at 37 °C. The next day, the culture medium was removed, and the cells were incubated with loading suspension (DMEM, supplemented as described above, and 0.8  $\mu\text{M}$  Hoechst 33342) in combination with the test compound at increasing concentrations (10 nM-100  $\mu\text{M}$ ) for 2 h (37 °C, 5%  $\text{CO}_2$ ). FTC at a final concentration of 10  $\mu\text{M}$  served as reference compound; under these conditions, the response was defined as 100% inhibition of Hoechst 33342 efflux. The supernatants were drained and the cells were fixed for 30 min under light protection using 100  $\mu\text{L}$  per well of a 4% PFA solution. Finally, MCF-7/Topo cells were washed with PBS (2x250  $\mu\text{L}$  per well) to remove residual dye. Cells were overlaid with PBS (100  $\mu\text{L}$ ), and the fluorescence intensities were determined using a GENios Pro microplate reader (TECAN Deutschland GmbH, Crailsheim, Germany). Measurement mode: fluorescence top; excitation filter: 340/35 nm; emission filter: 485/20 nm; number of reads: 10; integration time: 40 ms; lag time: 0 ms; mirror selection: automatic; plate definition file: GRE96ft.pdf; multiple reads per well (circle, 3x3); time between move and flash: 50 ms. On each plate, the optimal gain was calculated by determination of the fluorescence intensity in the presence of the reference compound FTC. Relative  $\text{IC}_{50}$  values were calculated using GraphPad Prism 7, "four parameter curve" fitting. Errors are expressed as standard error of the mean (SEM) [13].

## 2.6 Stability of test compounds Dulbecco's Modified Eagle Medium (DMEM)

Stock solutions of the test compounds (3 mM) were prepared in DMSO. A 1:50 dilution of the substances in DMEM (containing 10% FCS) was prepared in 1.5-mL polypropylene reaction vessels (Eppendorf, Hamburg, Germany). The samples were shortly vortexed and incubated at 37 °C. At different periods of time, aliquots were taken, and the samples were deproteinated by mixing with two parts of ice-cold acetonitrile. For quantitative precipitation, the samples were vortexed and stored at 4 °C for 30 min. Finally, samples were centrifuged for 5 min at 14,000 g, using an Eppendorf MiniSpin plus centrifuge, and the supernatants were transferred into new reaction vessels. Prior to HPLC analysis, the samples were diluted (1:1) with acetonitrile and stored at -80 °C. Subsequent RP-HPLC analysis were performed using a Agilent 1220 Infinity LC System equipped with a Phenomenex Luna® 3 $\mu$  C18 column (150  $\times$  2.0 mm, 100 Å) at 30°C. HPLC conditions: solvent A = water (Millipore)/TFA (0.05% v/v); solvent B = MeCN (Merck, gradient grade); flow rate = 0.3 mL/min; injection volume 100  $\mu$ L; gradient: 10% to 95% B in 30 min. UV-detection at 220 nm.

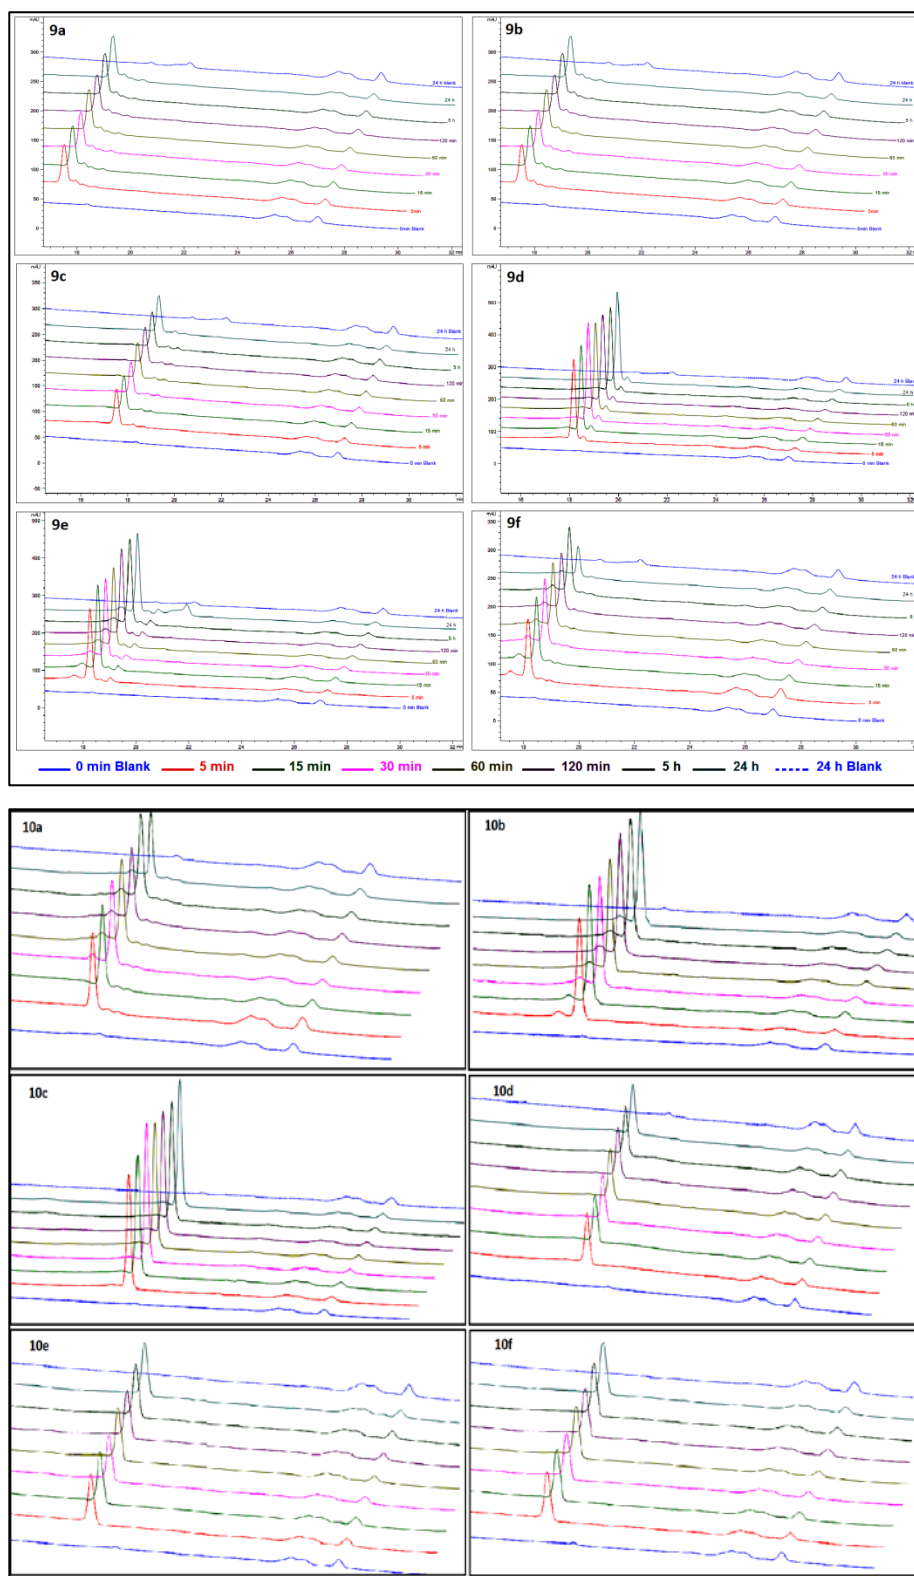

**Figure 1** Chemical stability of compounds in DMEM for 24 h A) chalcones **16a-f** B) ketones **17a-f** (HPLC analysis, UV detection at 220 nm)

## 2.7 Chemosensitivity assay

The assays were performed as described previously [15] with slight modifications. Briefly, 100 mL/well of a tumor cell suspension, yielding a density of 10-20 cells per microscopic field (Olympus, CK2, 320x), were seeded into 96-well plates and incubated overnight at 37°C and 5% CO<sub>2</sub>. The next day, 100 mL/well of fresh medium was added containing the test compounds in various concentrations or vehicle. In general, test compounds were added as 1000-fold concentrated feed solutions (16 wells per drug concentration). On every plate, untreated cells (solvent DMSO in a dilution of 1:1000) served as growth control (vehicle), cells treated with a reference cytostatic (vinblastine) as a positive control. Incubation of the cells was stopped after different periods of time by removal of medium and fixation with a solution of 2% glutardialdehyde (in PBS). All plates were stored at 4 °C until the end of the experiment and afterwards simultaneously stained with 100 mL/well of a 0.02% aq crystal violet solution for 20 min. The trays were rinsed with H<sub>2</sub>O for 20 min in order to remove residual dye. Crystal violet bound by the fixed cells was extracted with 70% EtOH (180 mL/well) while shaking the microplates for 2 h. Absorbance (a parameter proportional to cell mass) was measured at 580 nm using the GENios Pro microplate reader.

## References

1. Corson, B. and R. Hazen, *m-Nitroacetophenone*. *Org. Synth.*, 1930(10): p. 74-74.
2. Montiel, L.E., L.G. Zepeda, and J. Tamariz, *Efficient total synthesis of racemic bisabolane sesquiterpenes curcuphenol and xanthorrhizol starting from substituted acetophenones*. *Helv. Chim. Acta.*, 2010. **93**(7): p. 1261-1273.
3. Chang, F., et al., *Highly efficient solvent-free catalytic hydrogenation of solid alkenes and nitro-aromatics using Pd nanoparticles entrapped in aluminum oxy-hydroxide*. *Tetrahedron Lett.*, 2010. **51**(32): p. 4250-4252.
4. Ueki, H., et al., *Efficient Large-Scale Synthesis of Picolinic Acid-Derived Nickel (II) Complexes of Glycine*. *Eur. J. Org. Chem.*, 2003. **2003**(10): p. 1954-1957.
5. Reddy, B.M., et al., *Silica gel catalyzed  $\alpha$ -bromination of ketones using N-bromosuccinimide: An easy and rapid method*. *Chin. Chem. Lett.*, 2014. **25**(1): p. 179-182.
6. Watanabe, H., et al., *A dual fluorinated and iodinated radiotracer for PET and SPECT imaging of  $\beta$ -amyloid plaques in the brain*. *Bioorg. Med. Chem. Lett.*, 2011. **21**(21): p. 6519-6522.
7. Divi, M.K.P., et al., *Process for the preparation of bazedoxifene acetate and intermediates thereof*, in *Patent and Trademark Office*. 2014, Google Patents: U.S.
8. Ochoa-Puentes, C., et al., *Benzanilide–Biphenyl Replacement: A Bioisosteric Approach to Quinoline Carboxamide-Type ABCG2 Modulators*. *ACS Med. Chem. Lett.*, 2013. **4**(4): p. 393-396.
9. Hao, J., et al., *Temperature-sensitive aliphatic polyesters: synthesis and characterization of  $\gamma$ -substituted caprolactone monomers and polymers*. *J. Mater. Chem.*, 2011. **21**(29): p. 10623-10628.
10. Glavinas, H., et al., *ABCG2 (breast cancer resistance protein/mitoxantrone resistance-associated protein) ATPase assay: a useful tool to detect drug-transporter interactions*. *Drug Metabolism and Disposition*, 2007. **35**(9): p. 1533-1542.



11. Bakos, E., et al., *Functional multidrug resistance protein (MRP1) lacking the N-terminal transmembrane domain*. Journal of Biological Chemistry, 1998. **273**(48): p. 32167-32175.
12. Evers, R., et al., *Drug export activity of the human canalicular multispecific organic anion transporter in polarized kidney MDCK cells expressing cMOAT (MRP2) cDNA*. Journal of Clinical Investigation, 1998. **101**(7): p. 1310.
13. L., S.J., *Guidelines for accurate EC50/IC50 estimation*. Pharmaceutical Statistics, 2011. **10**(2): p. 128-134.
14. Kühnle, M., *Experimental therapy and detection of glioblastoma: investigation of nanoparticles, ABCG2 modulators and optical imaging of intracerebral xenografts*. 2010.
15. Bernhardt, G., et al., *Standardized kinetic microassay to quantify differential chemosensitivity on the basis of proliferative activity*. J. Cancer Res. Clin. Oncol., 1992. **118**(1): p. 35-43.
